# Supplementary figures and images for: A microfluidic platform for the high-throughput study of pathological cardiac hypertrophy
Source: Royal Society of Chemistry journal article supplement (doi:10.1039/c7lc00415j), 2017-01-01

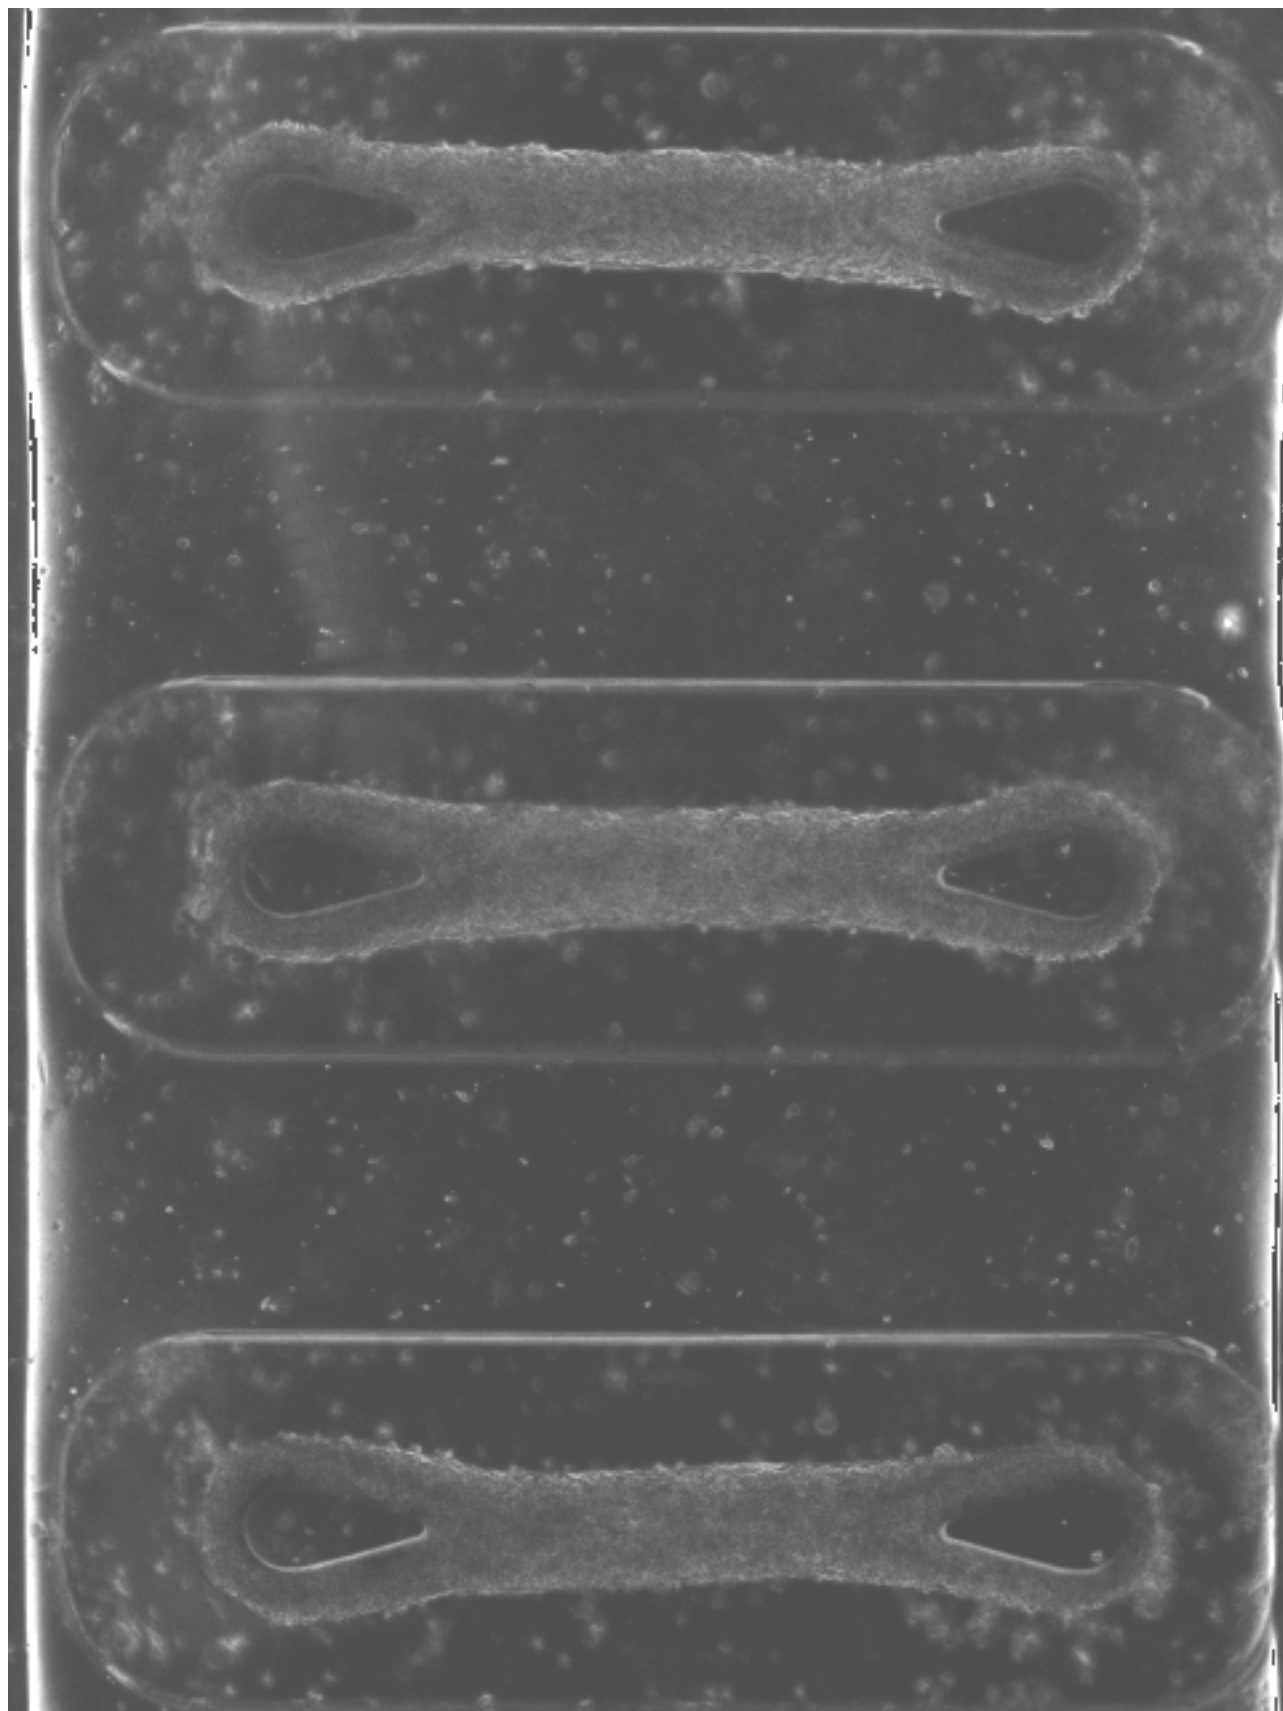

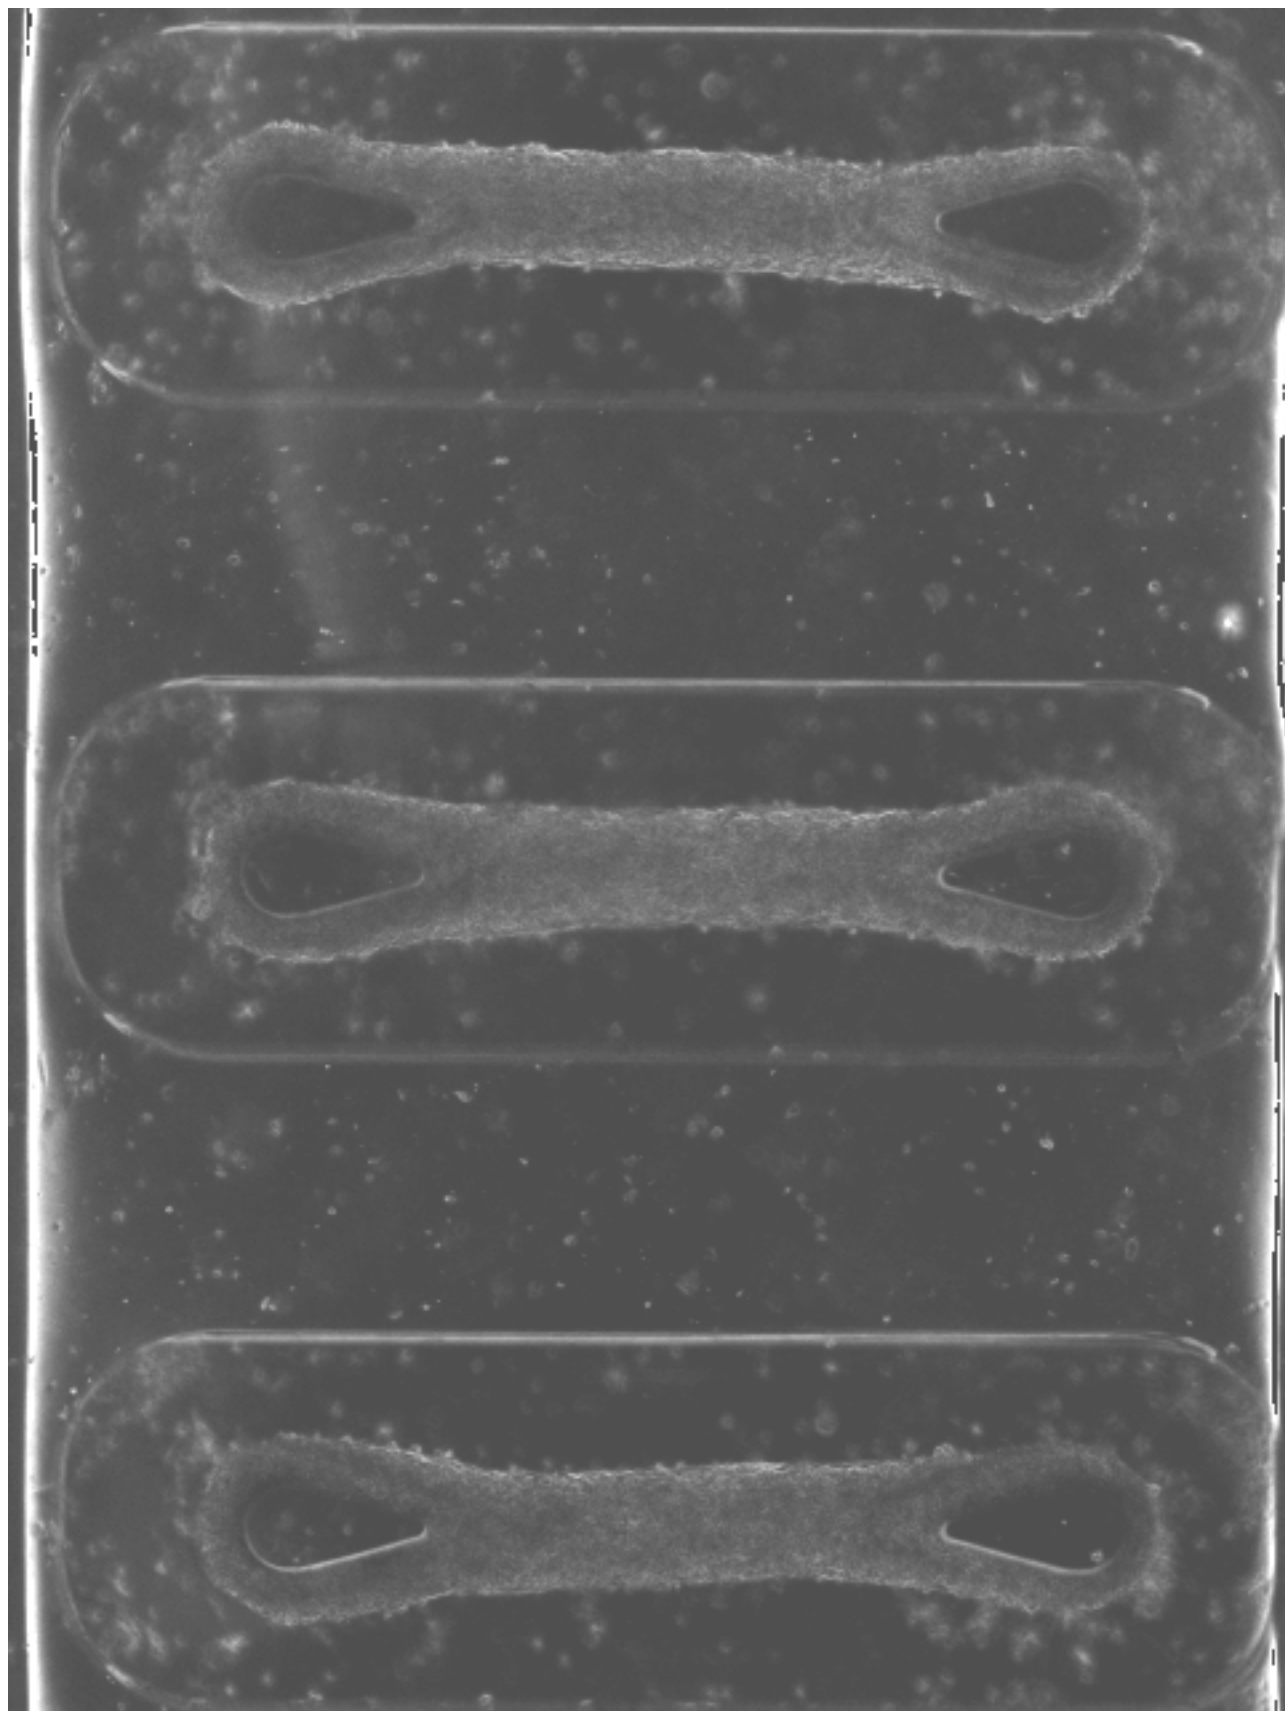

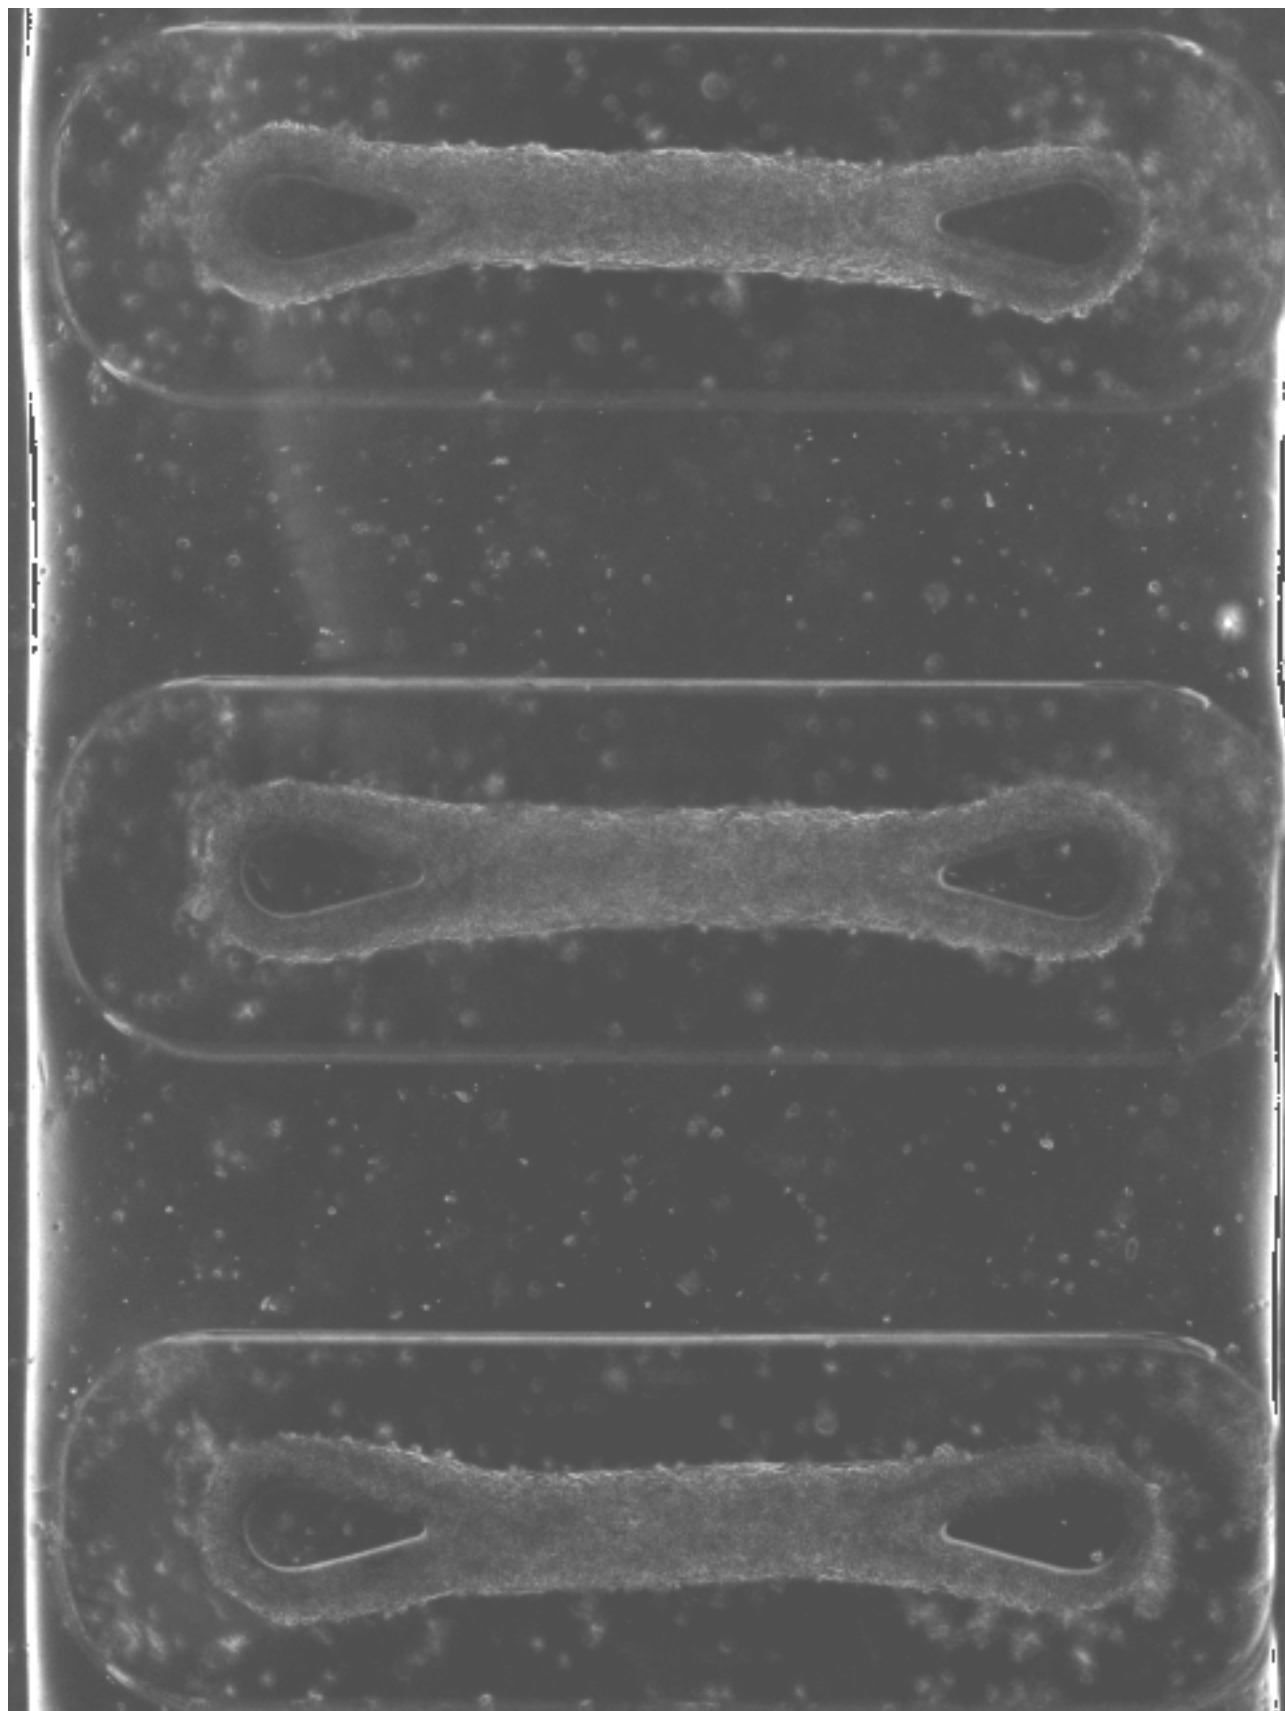

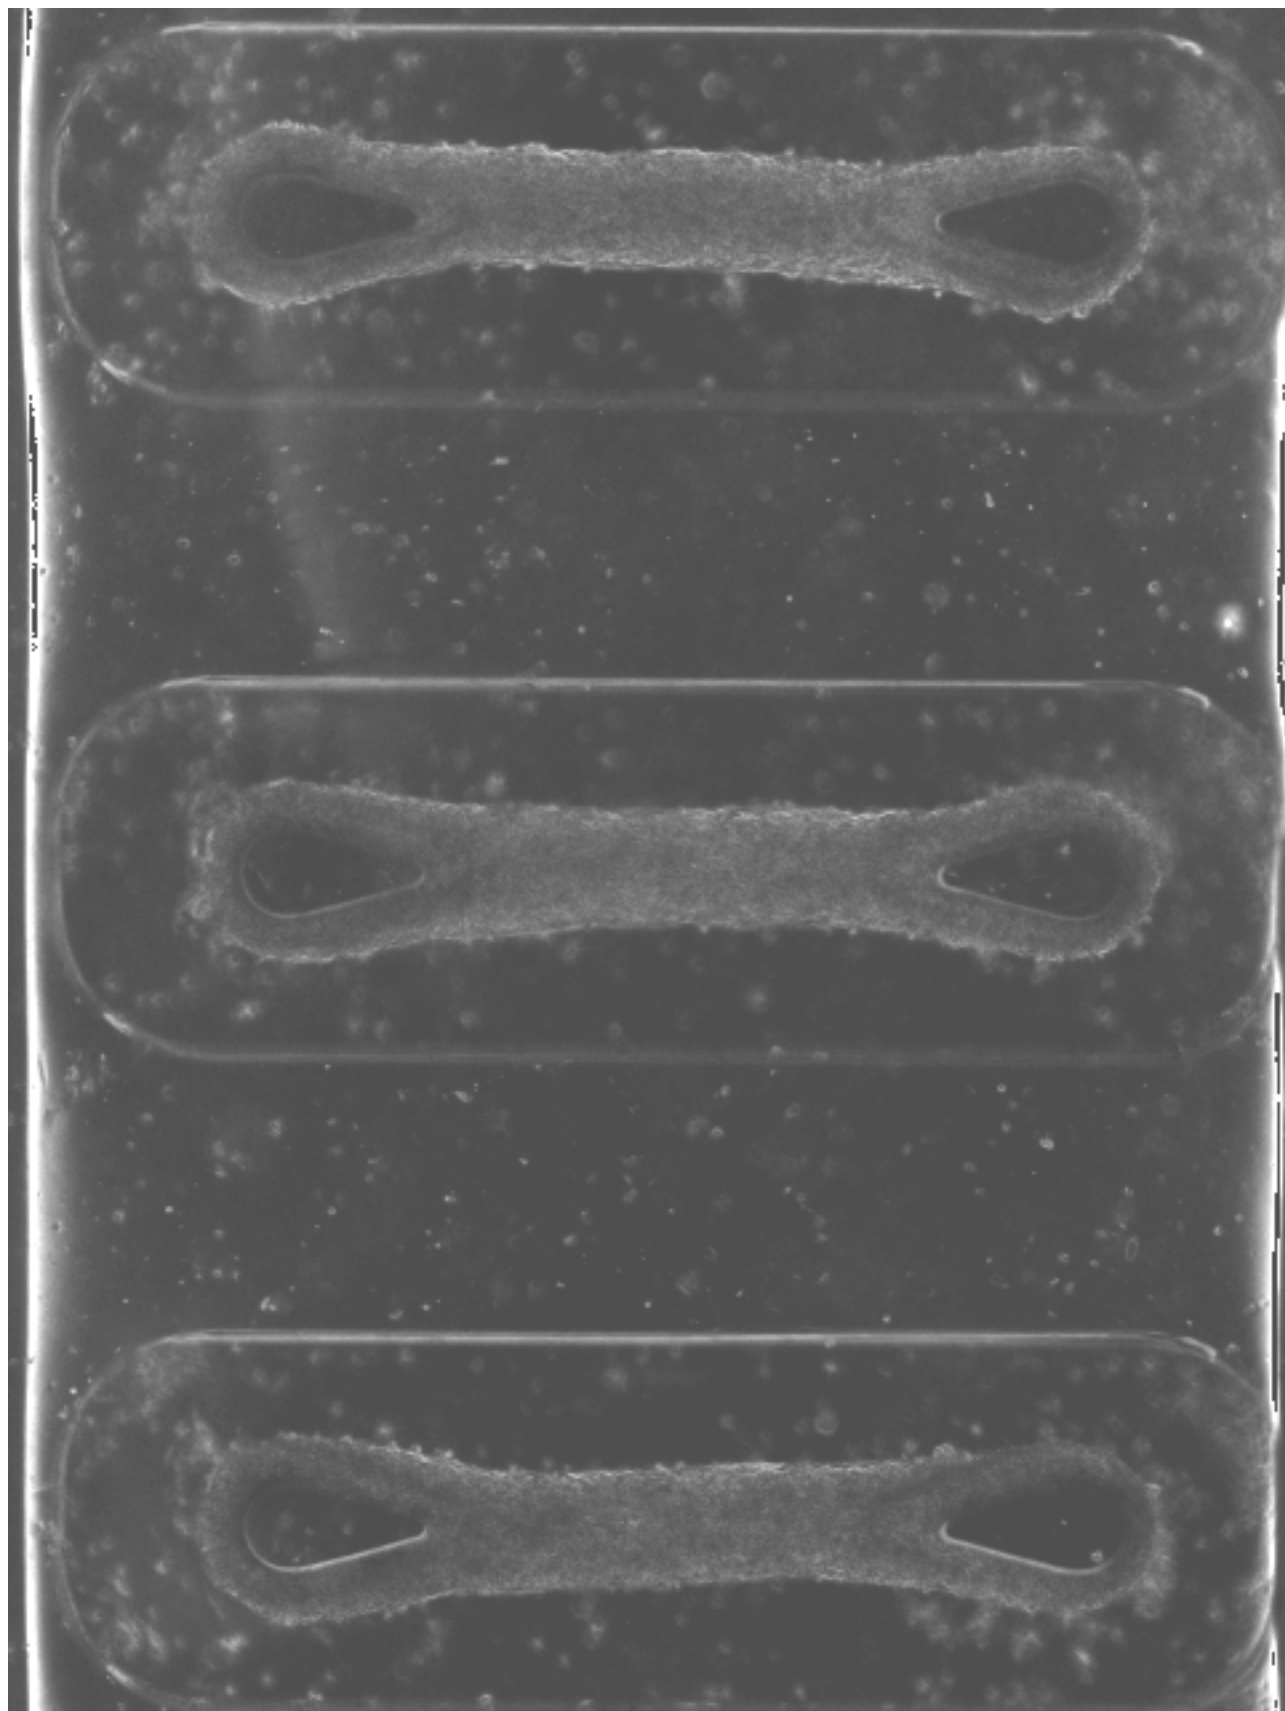



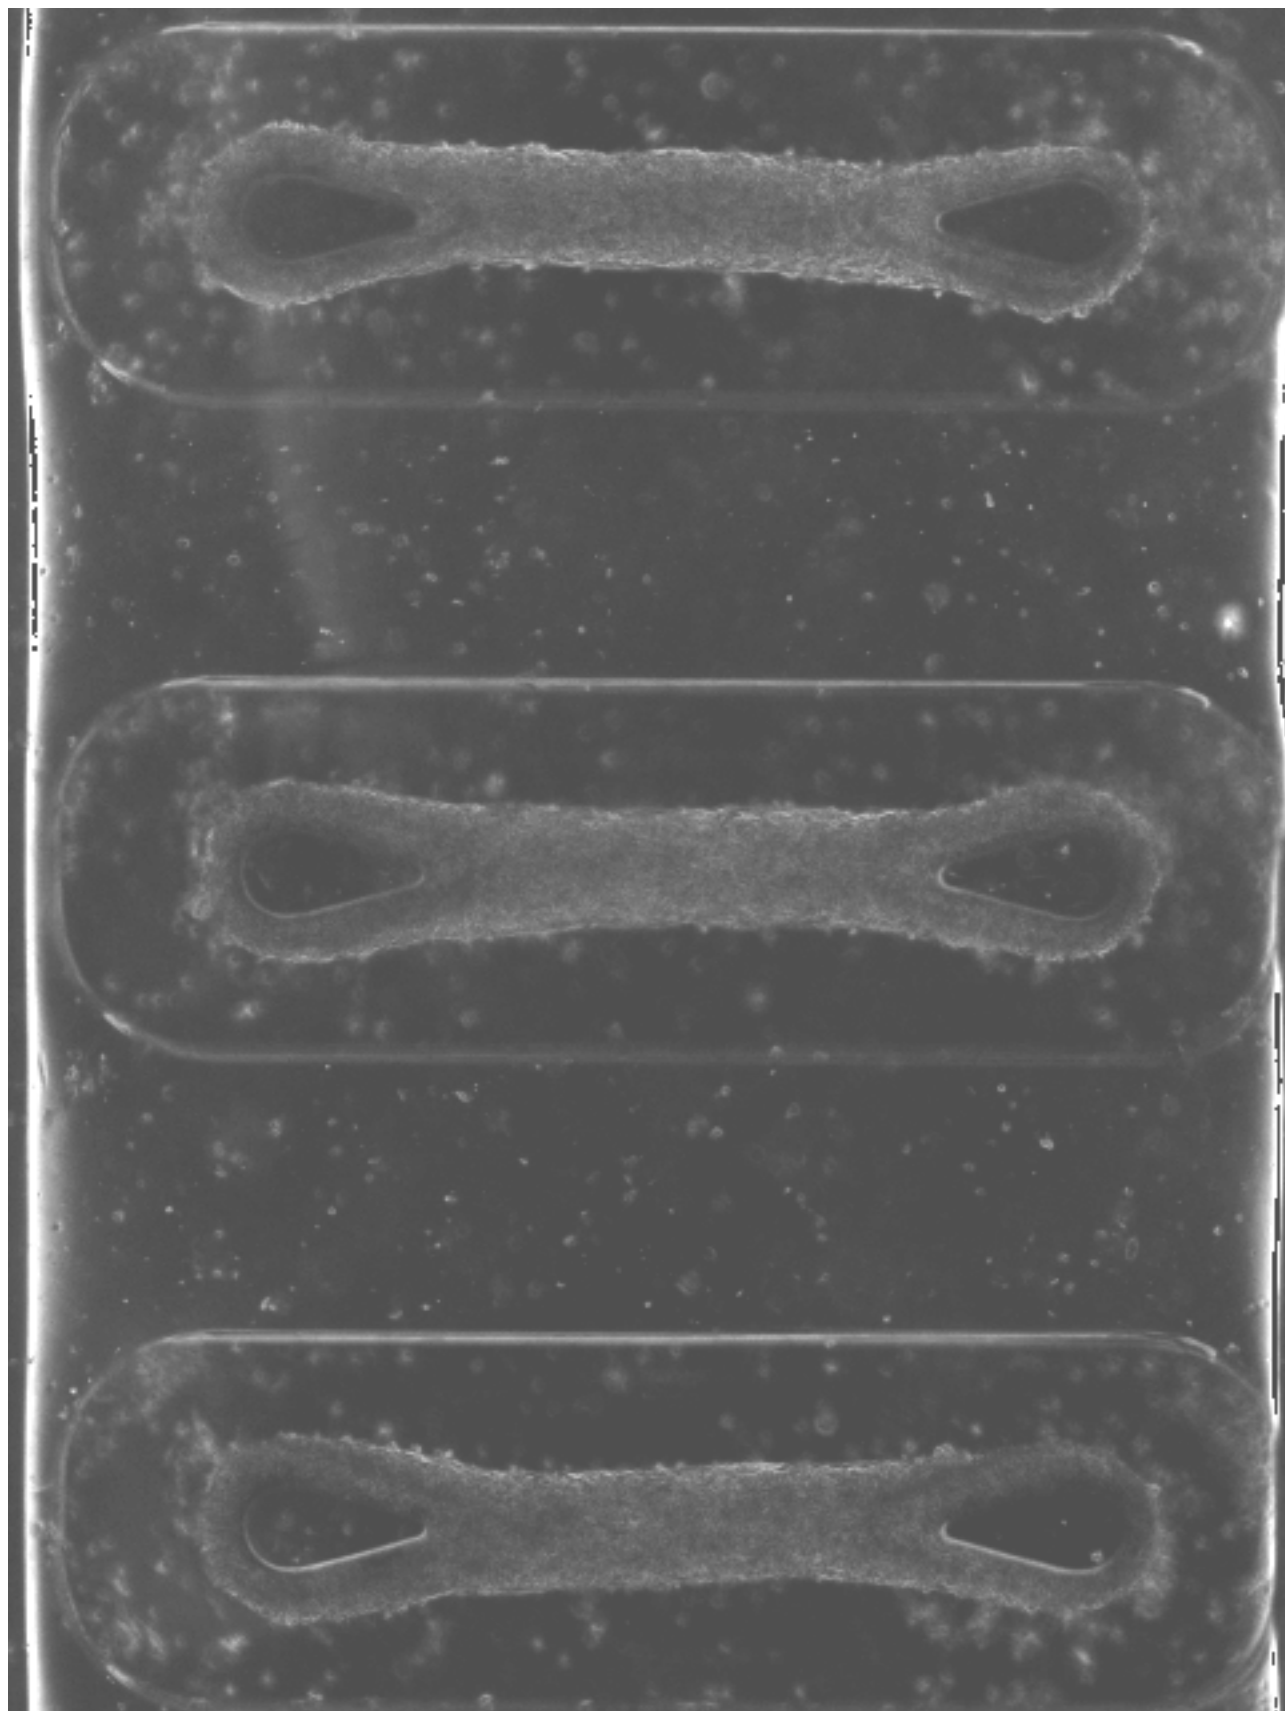

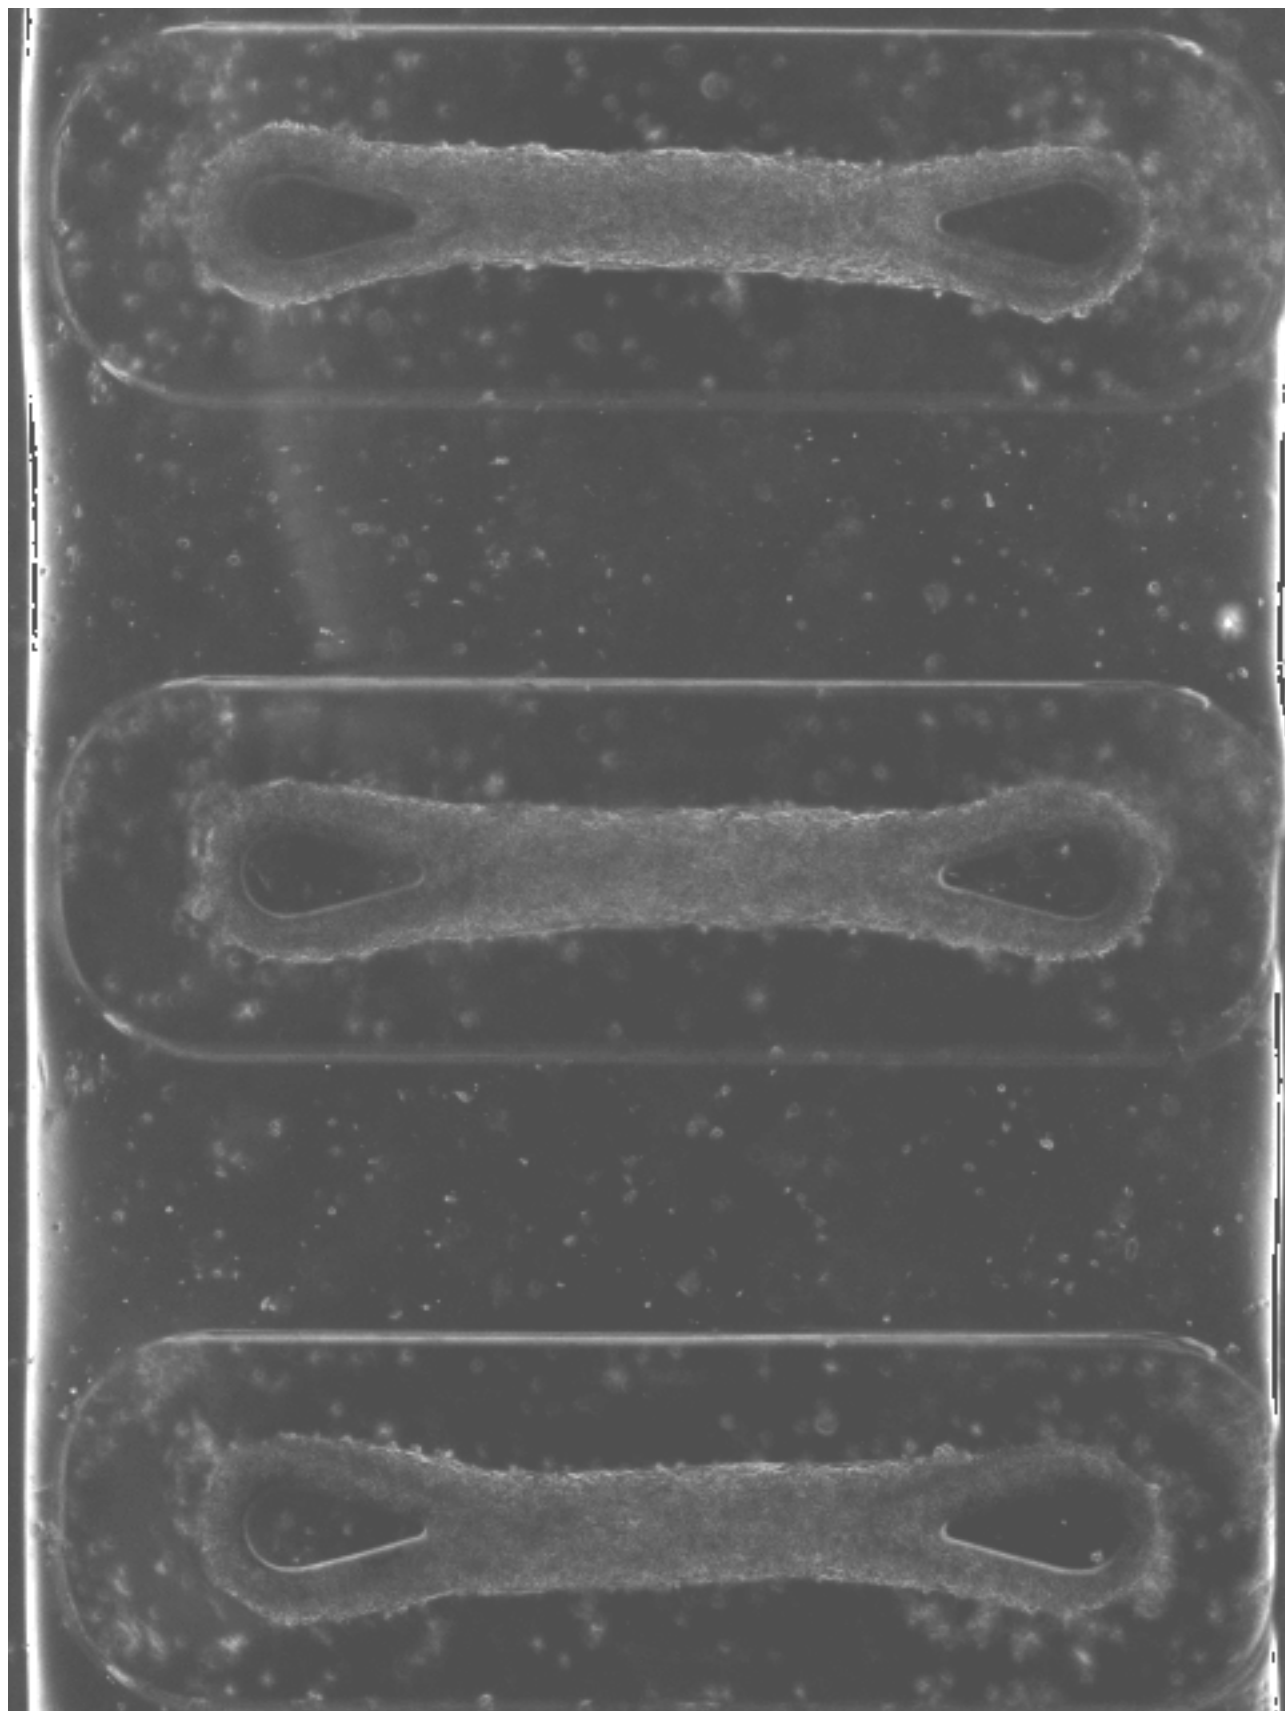

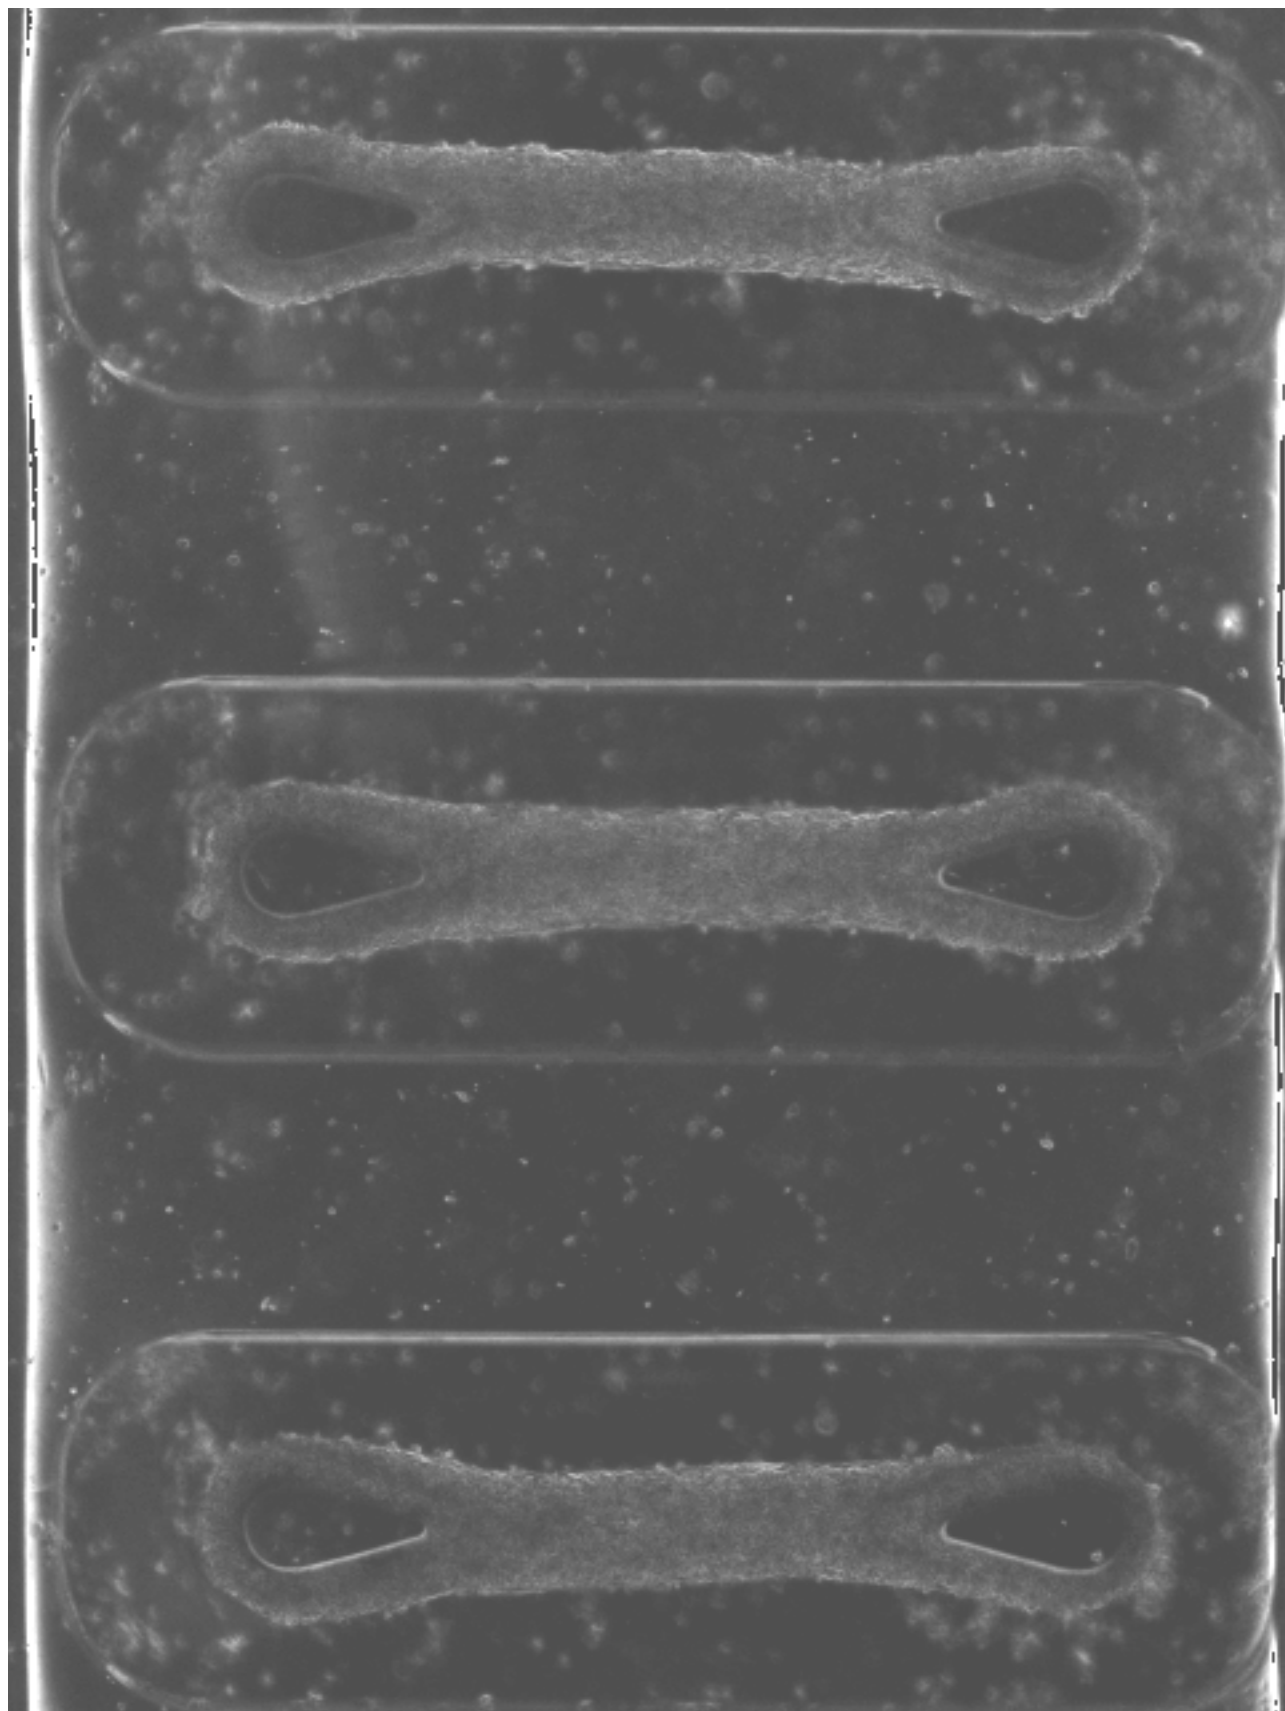

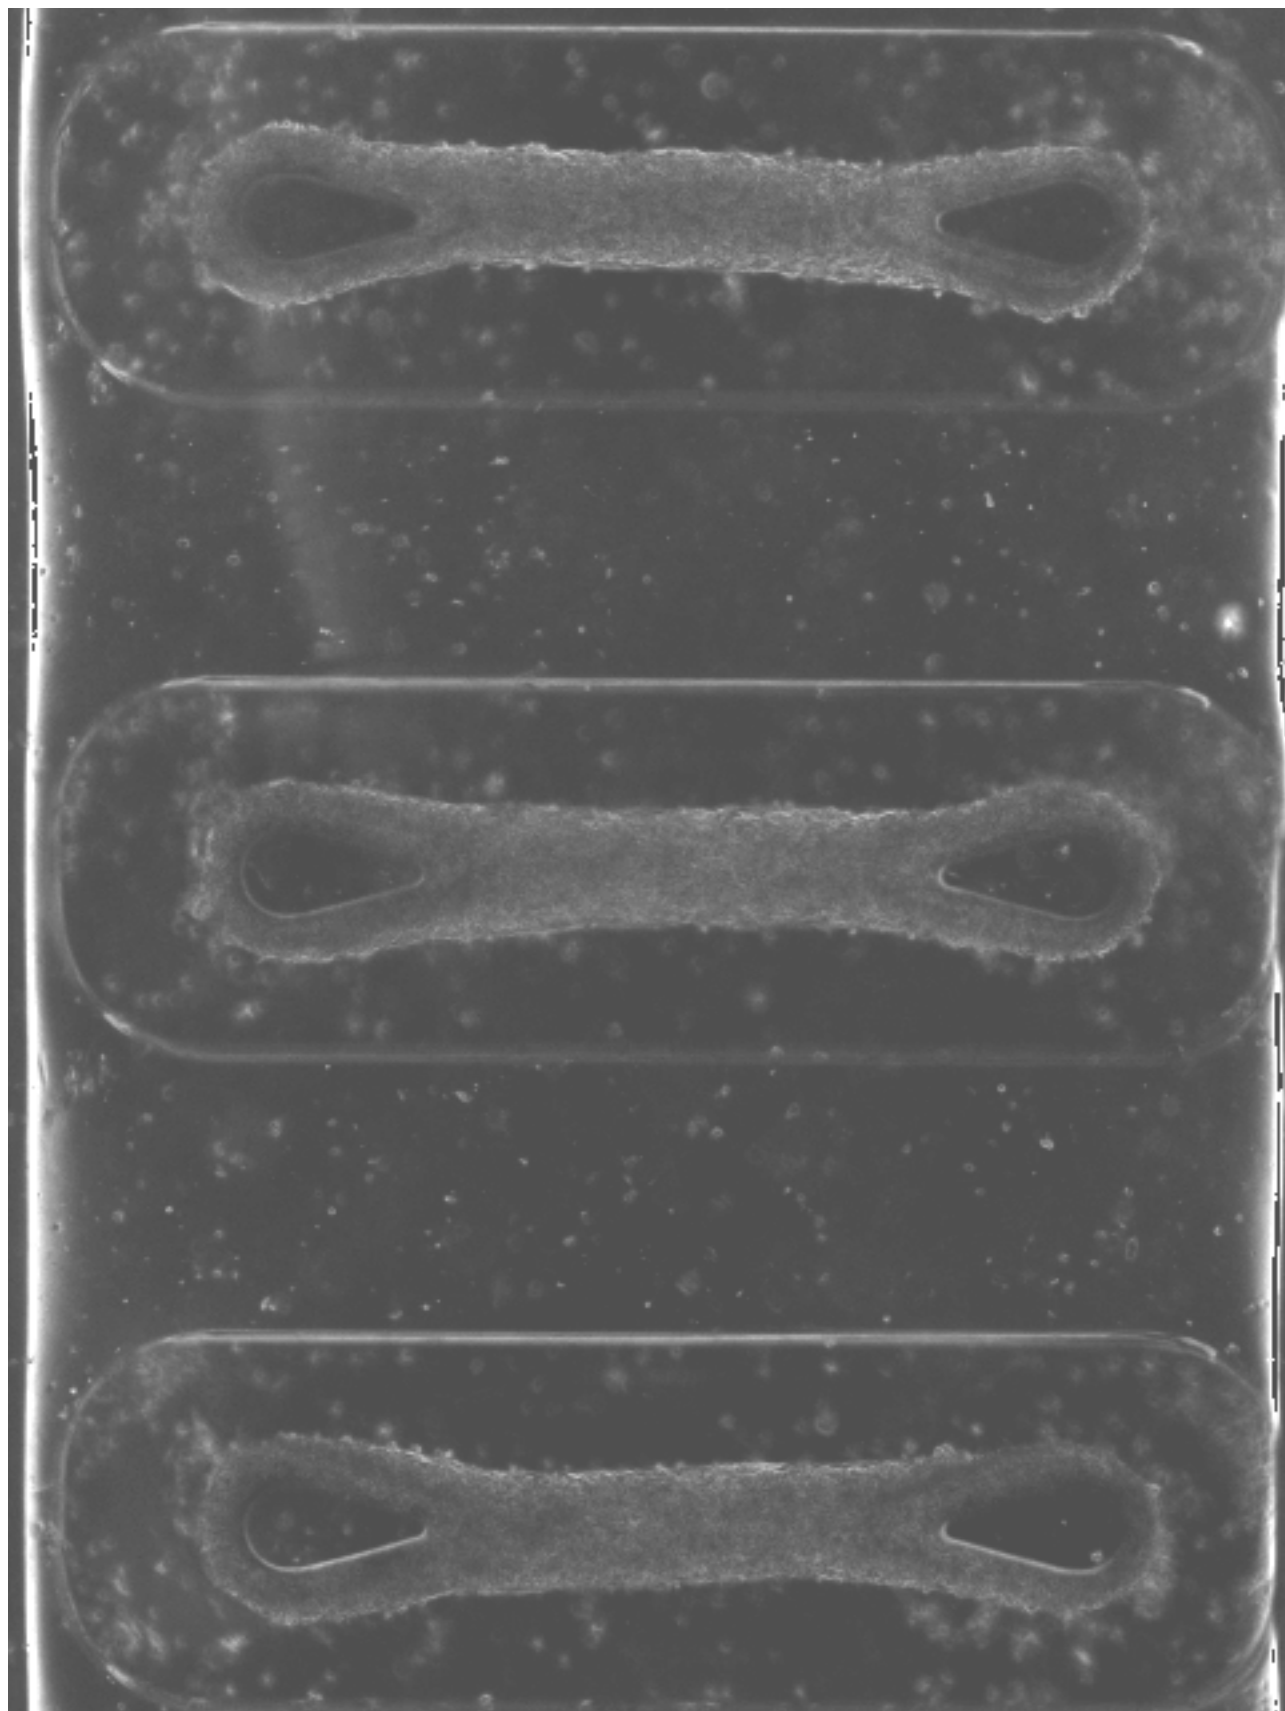

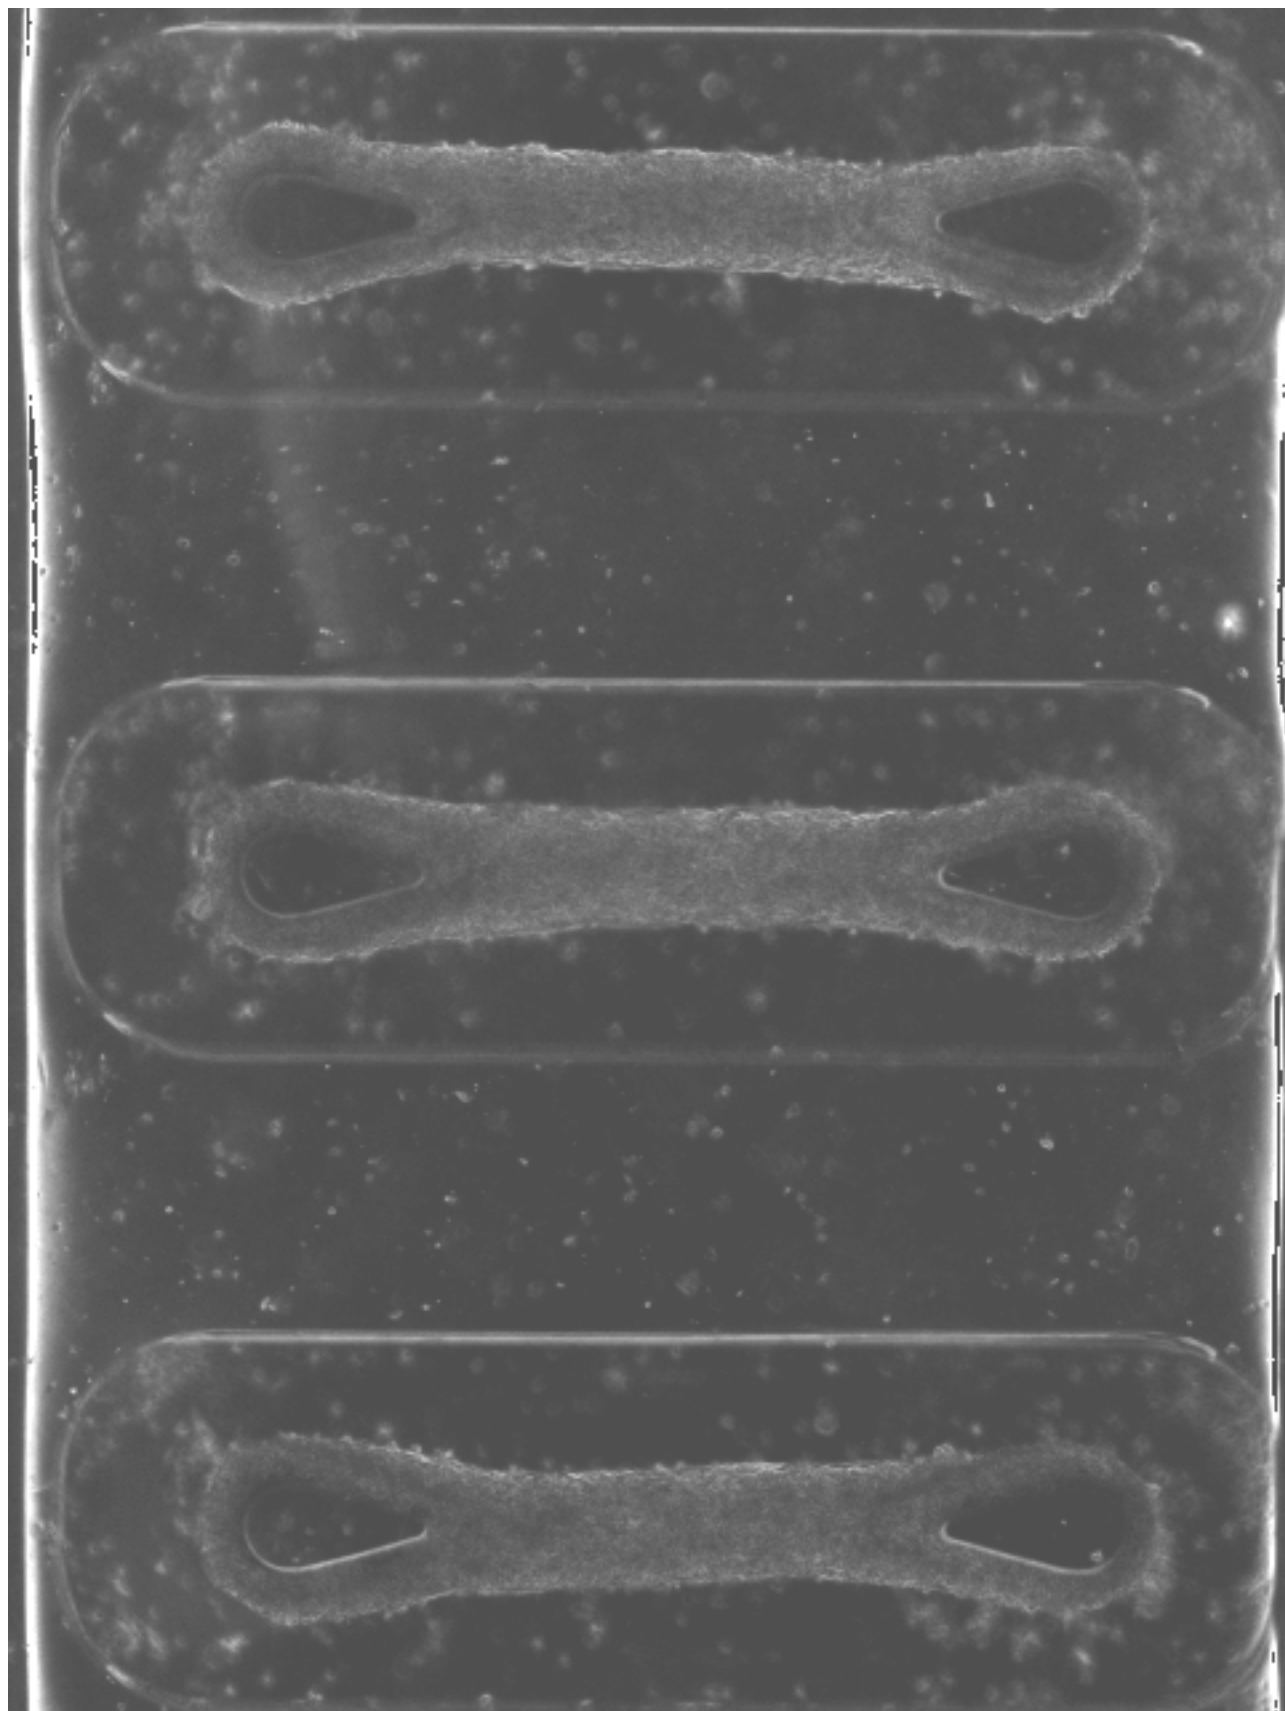

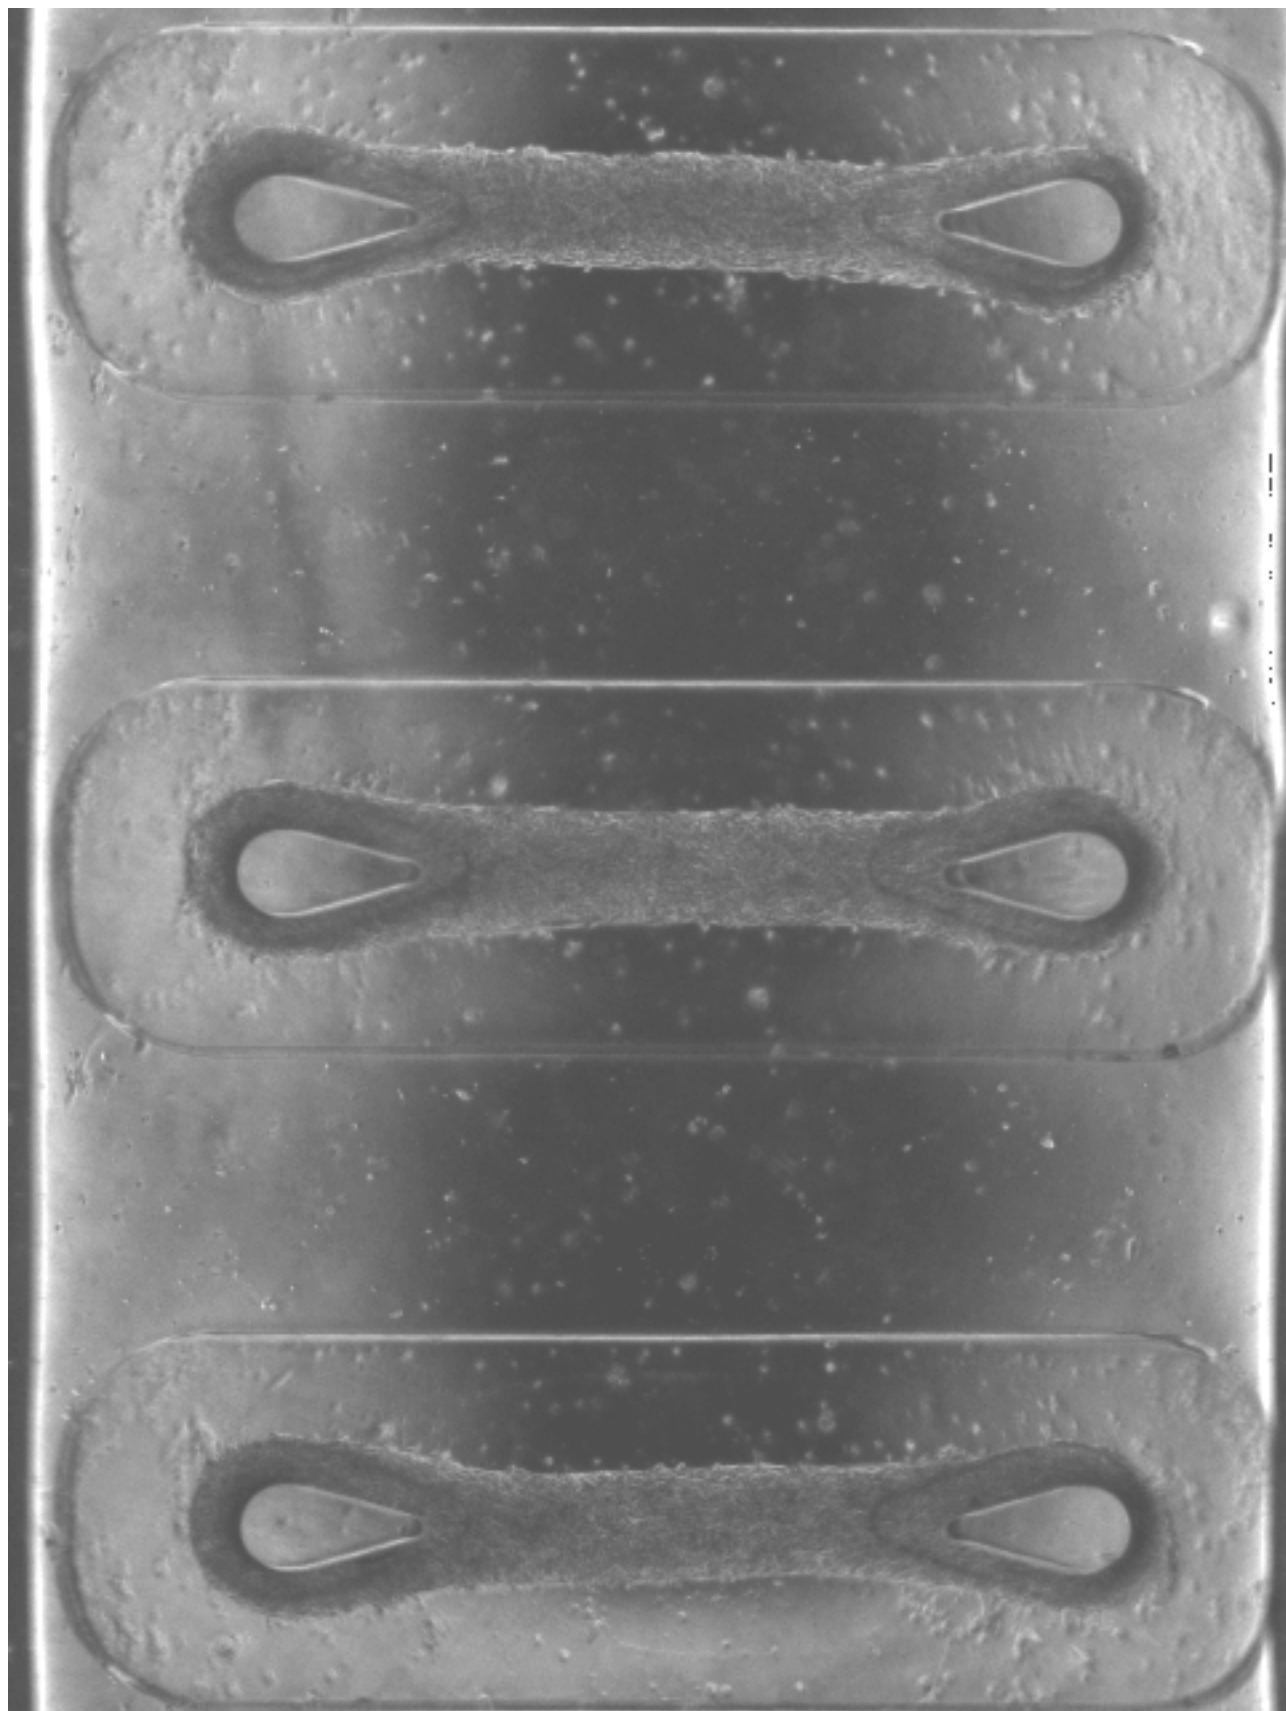

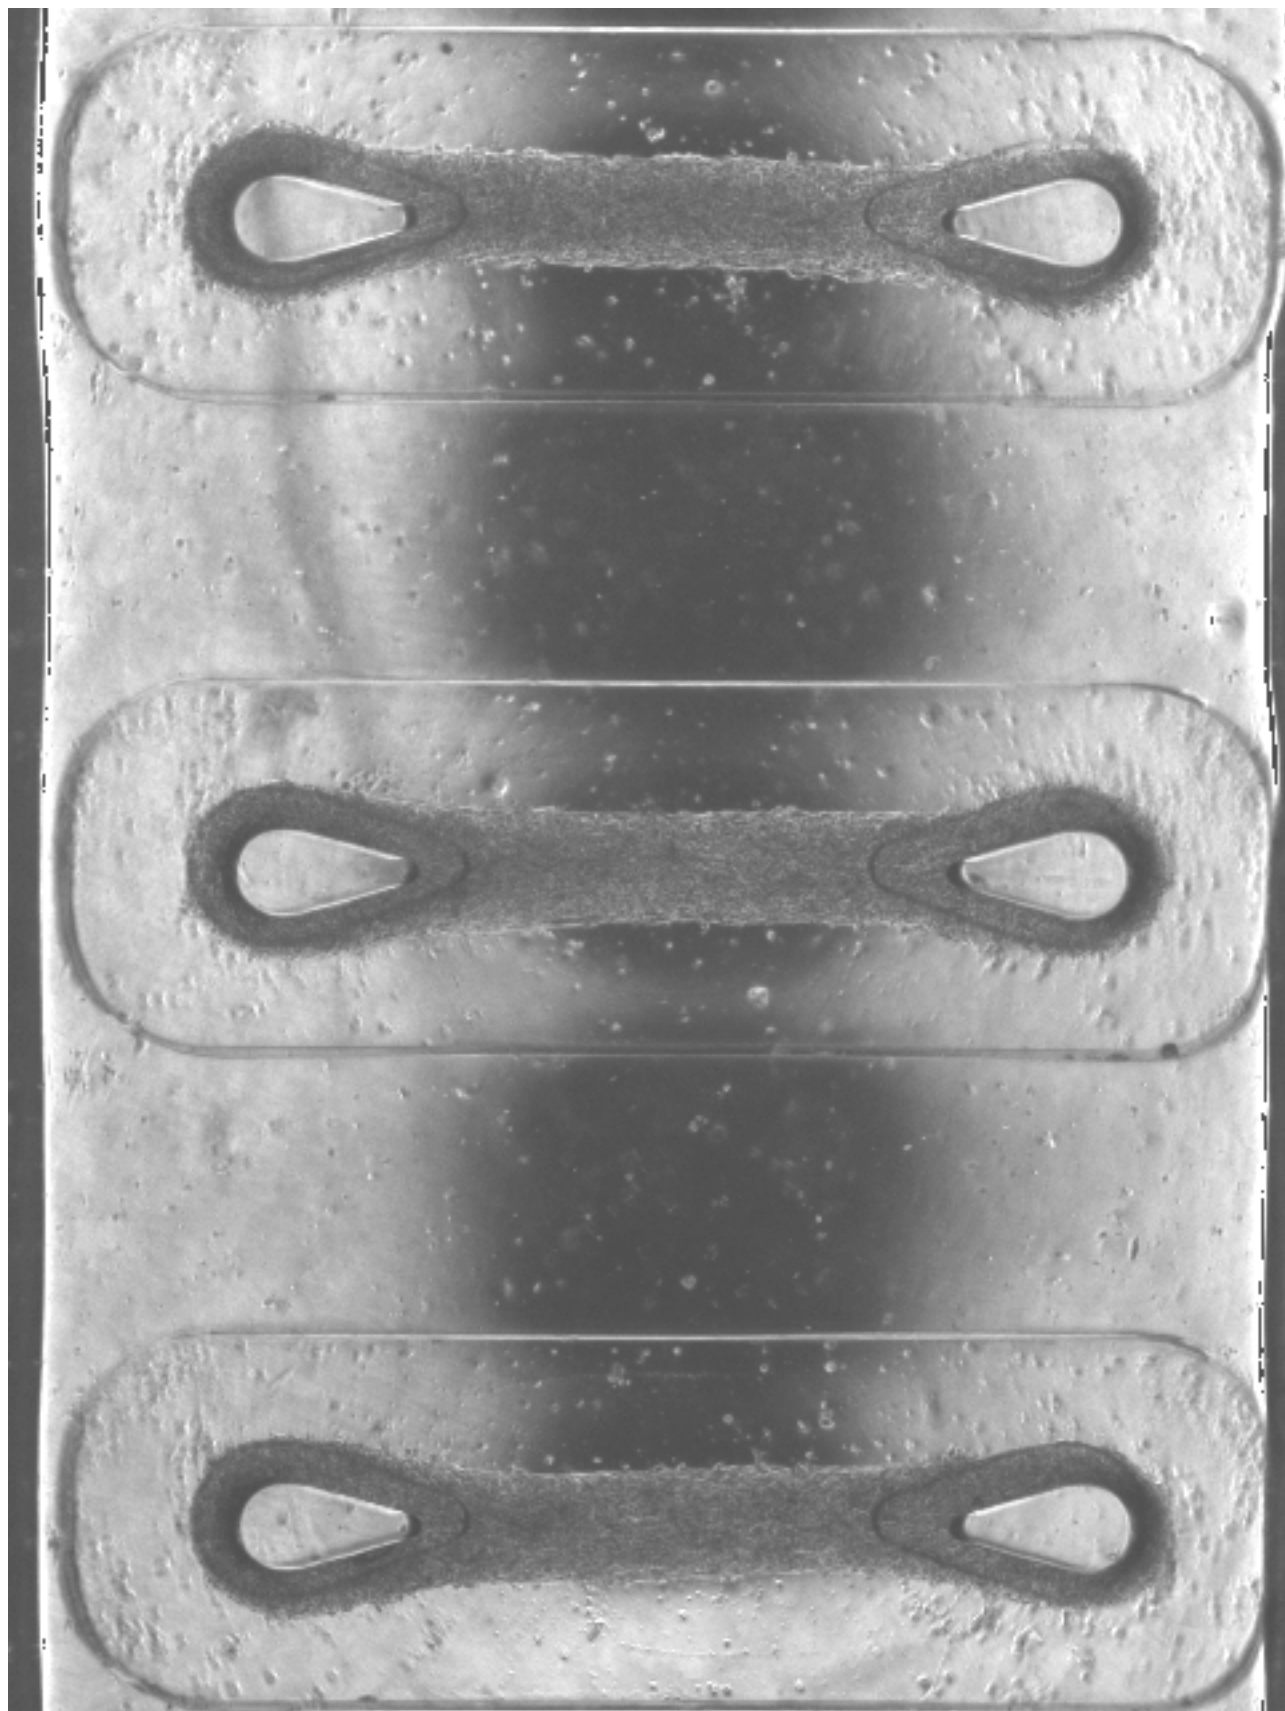



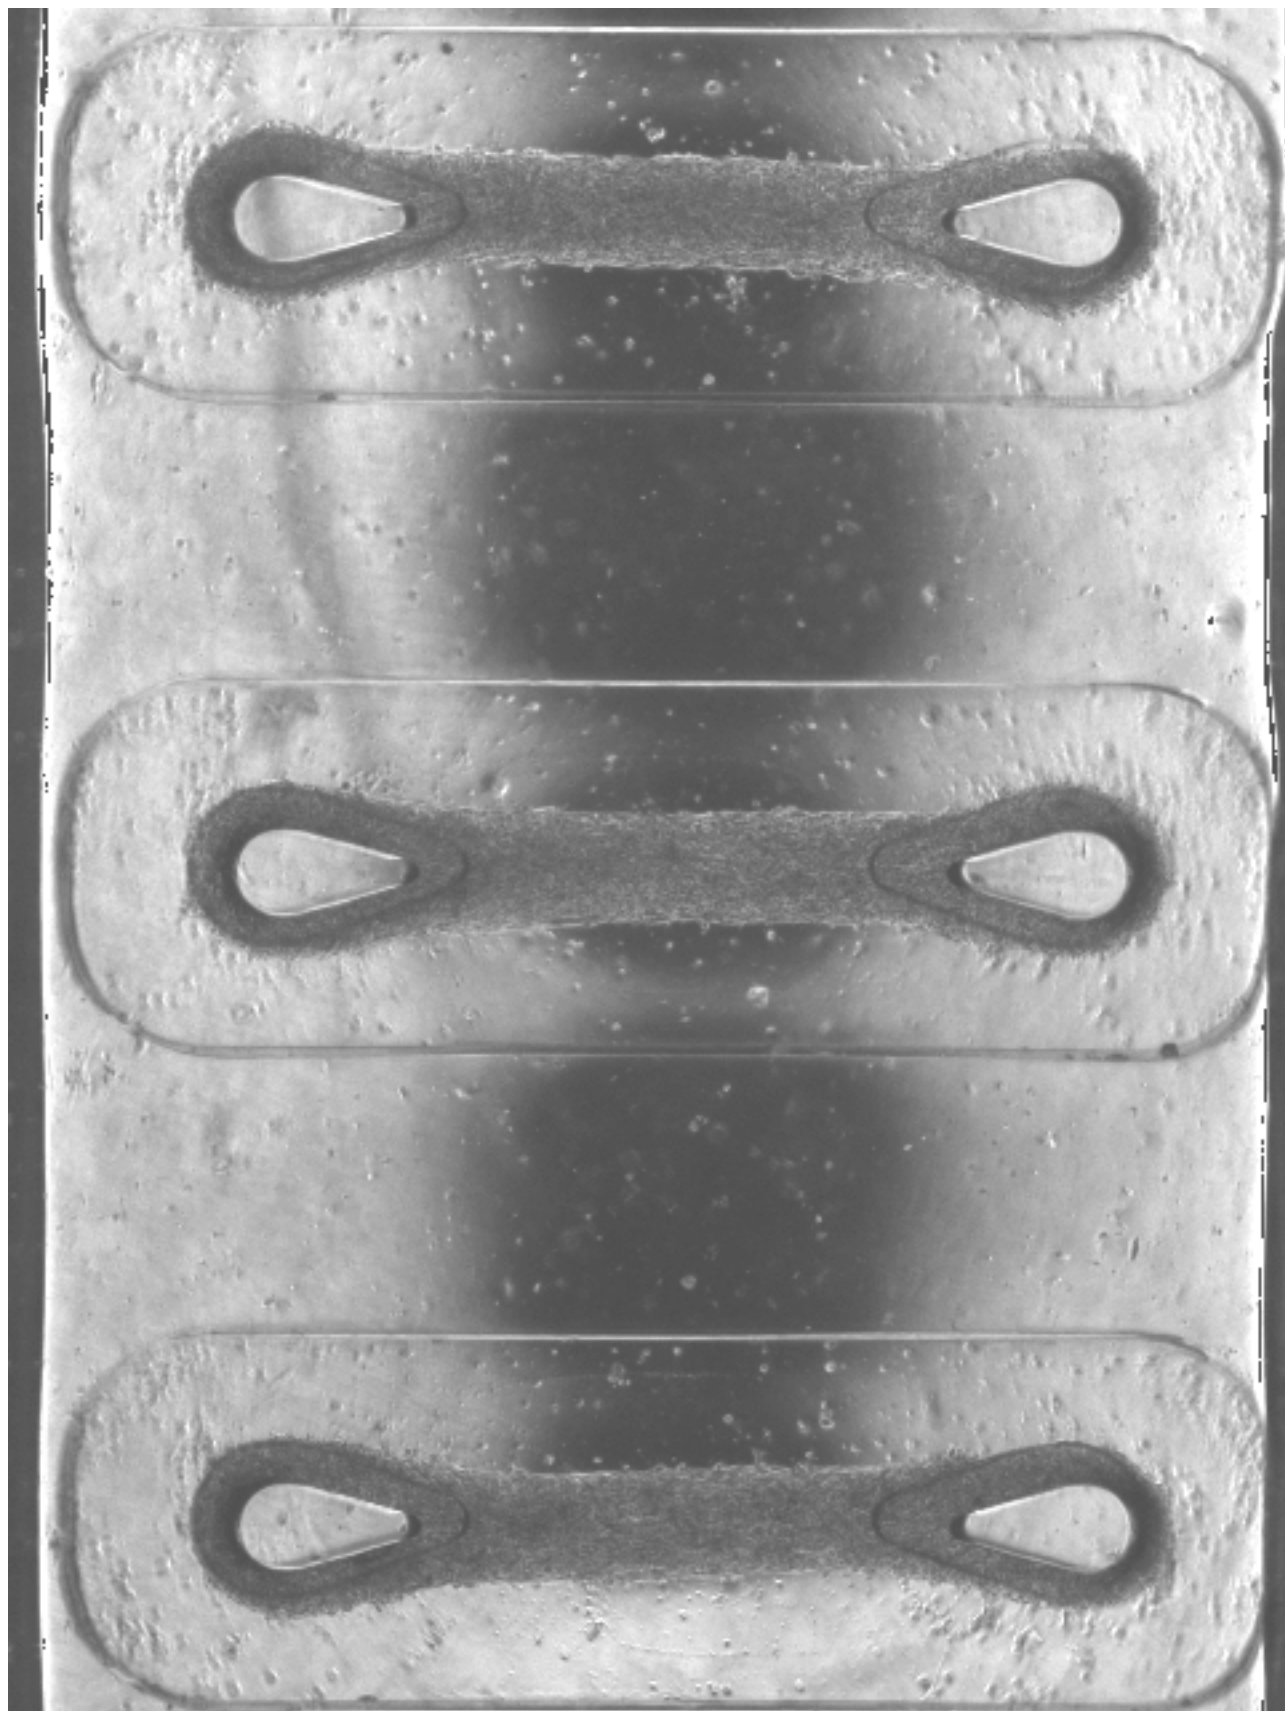

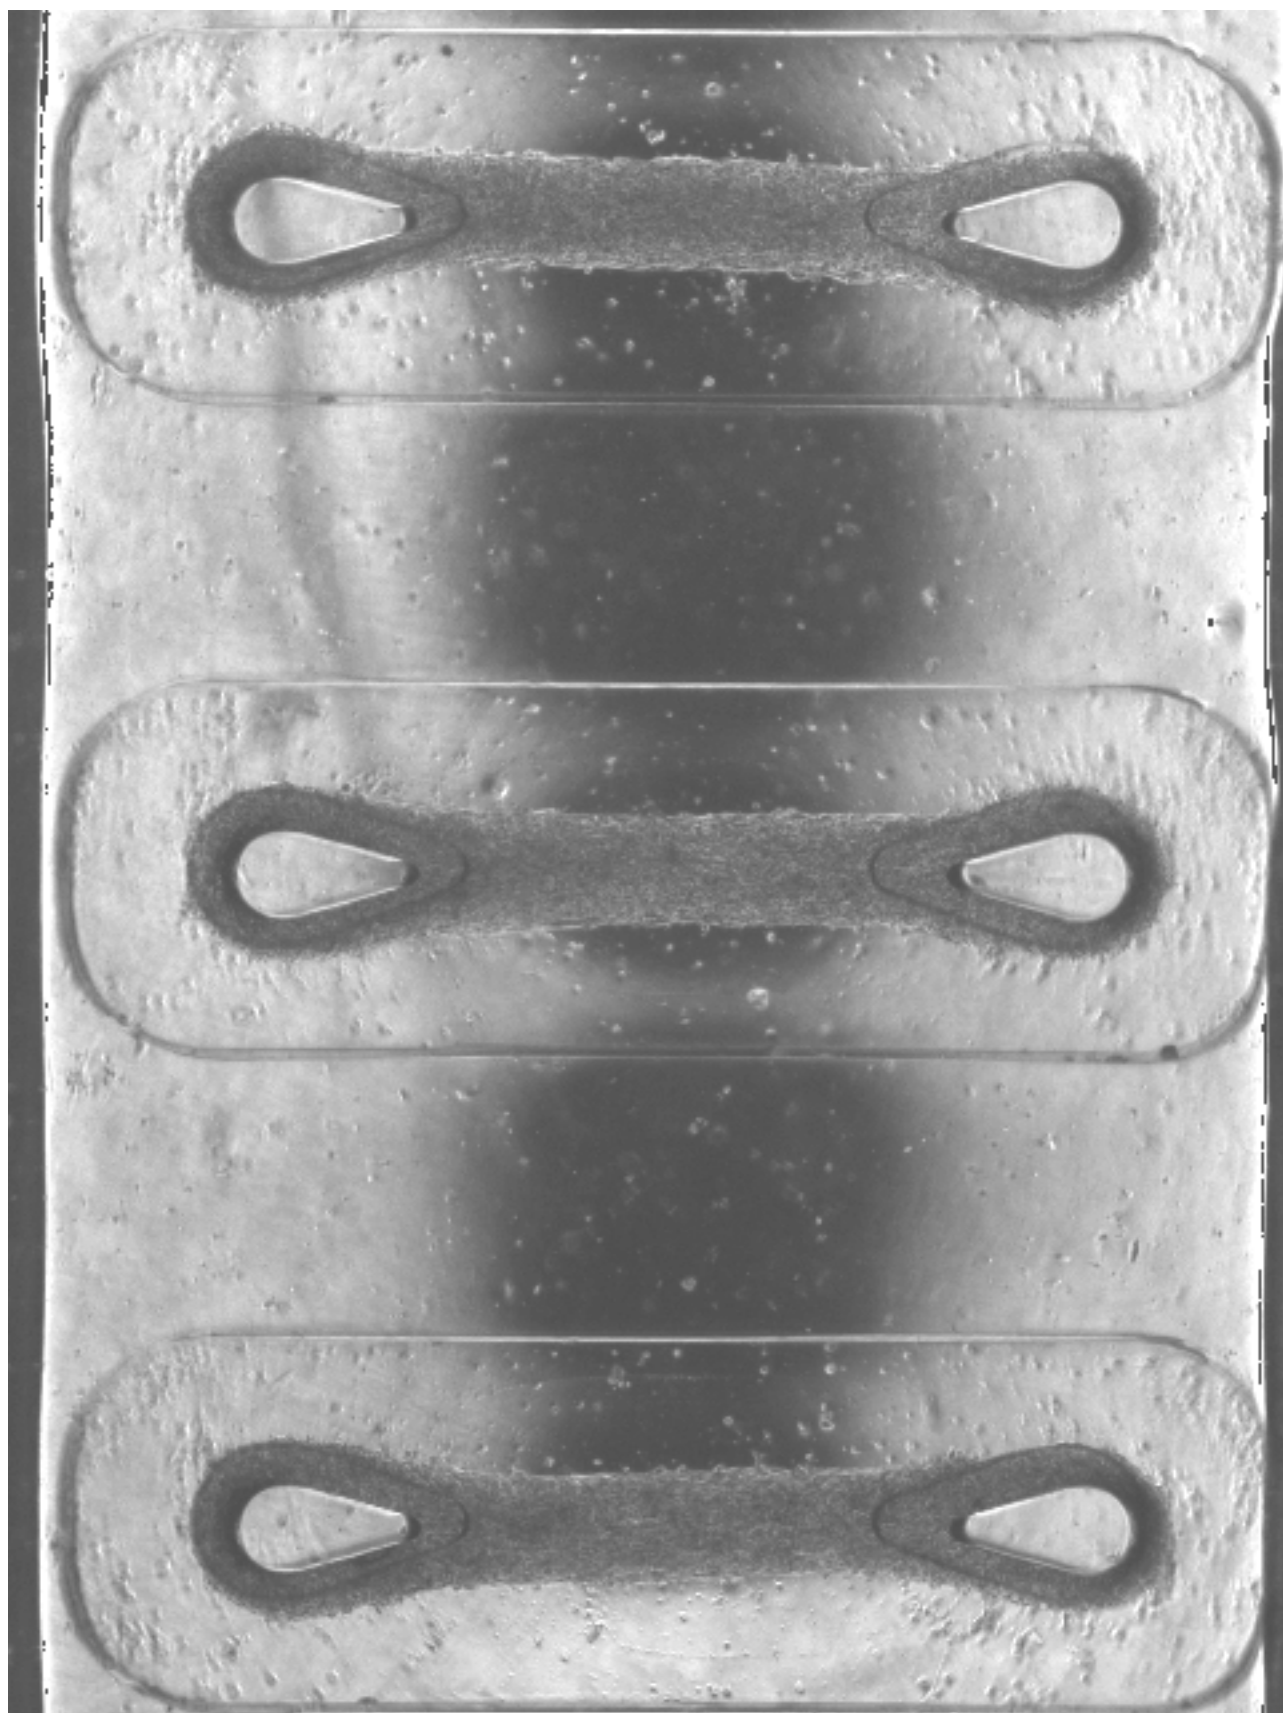

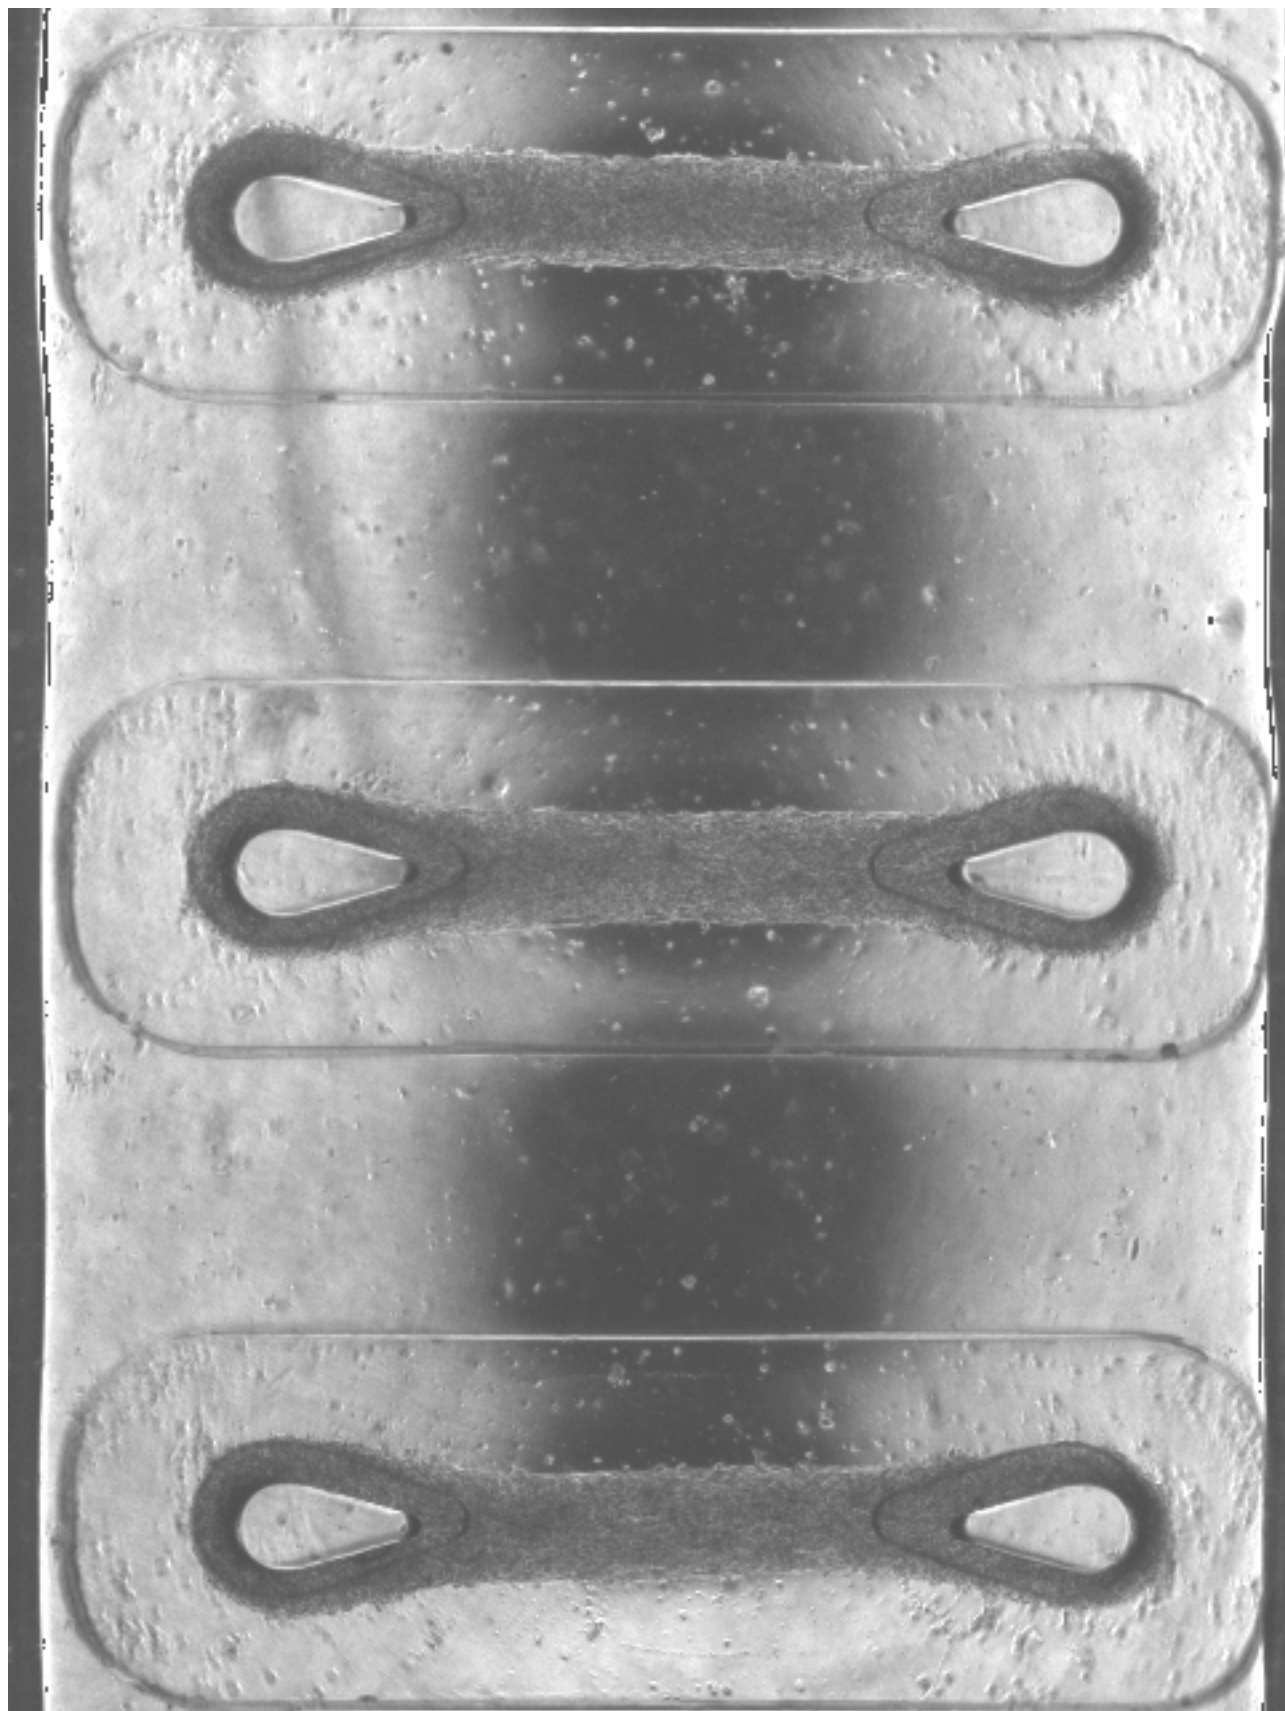

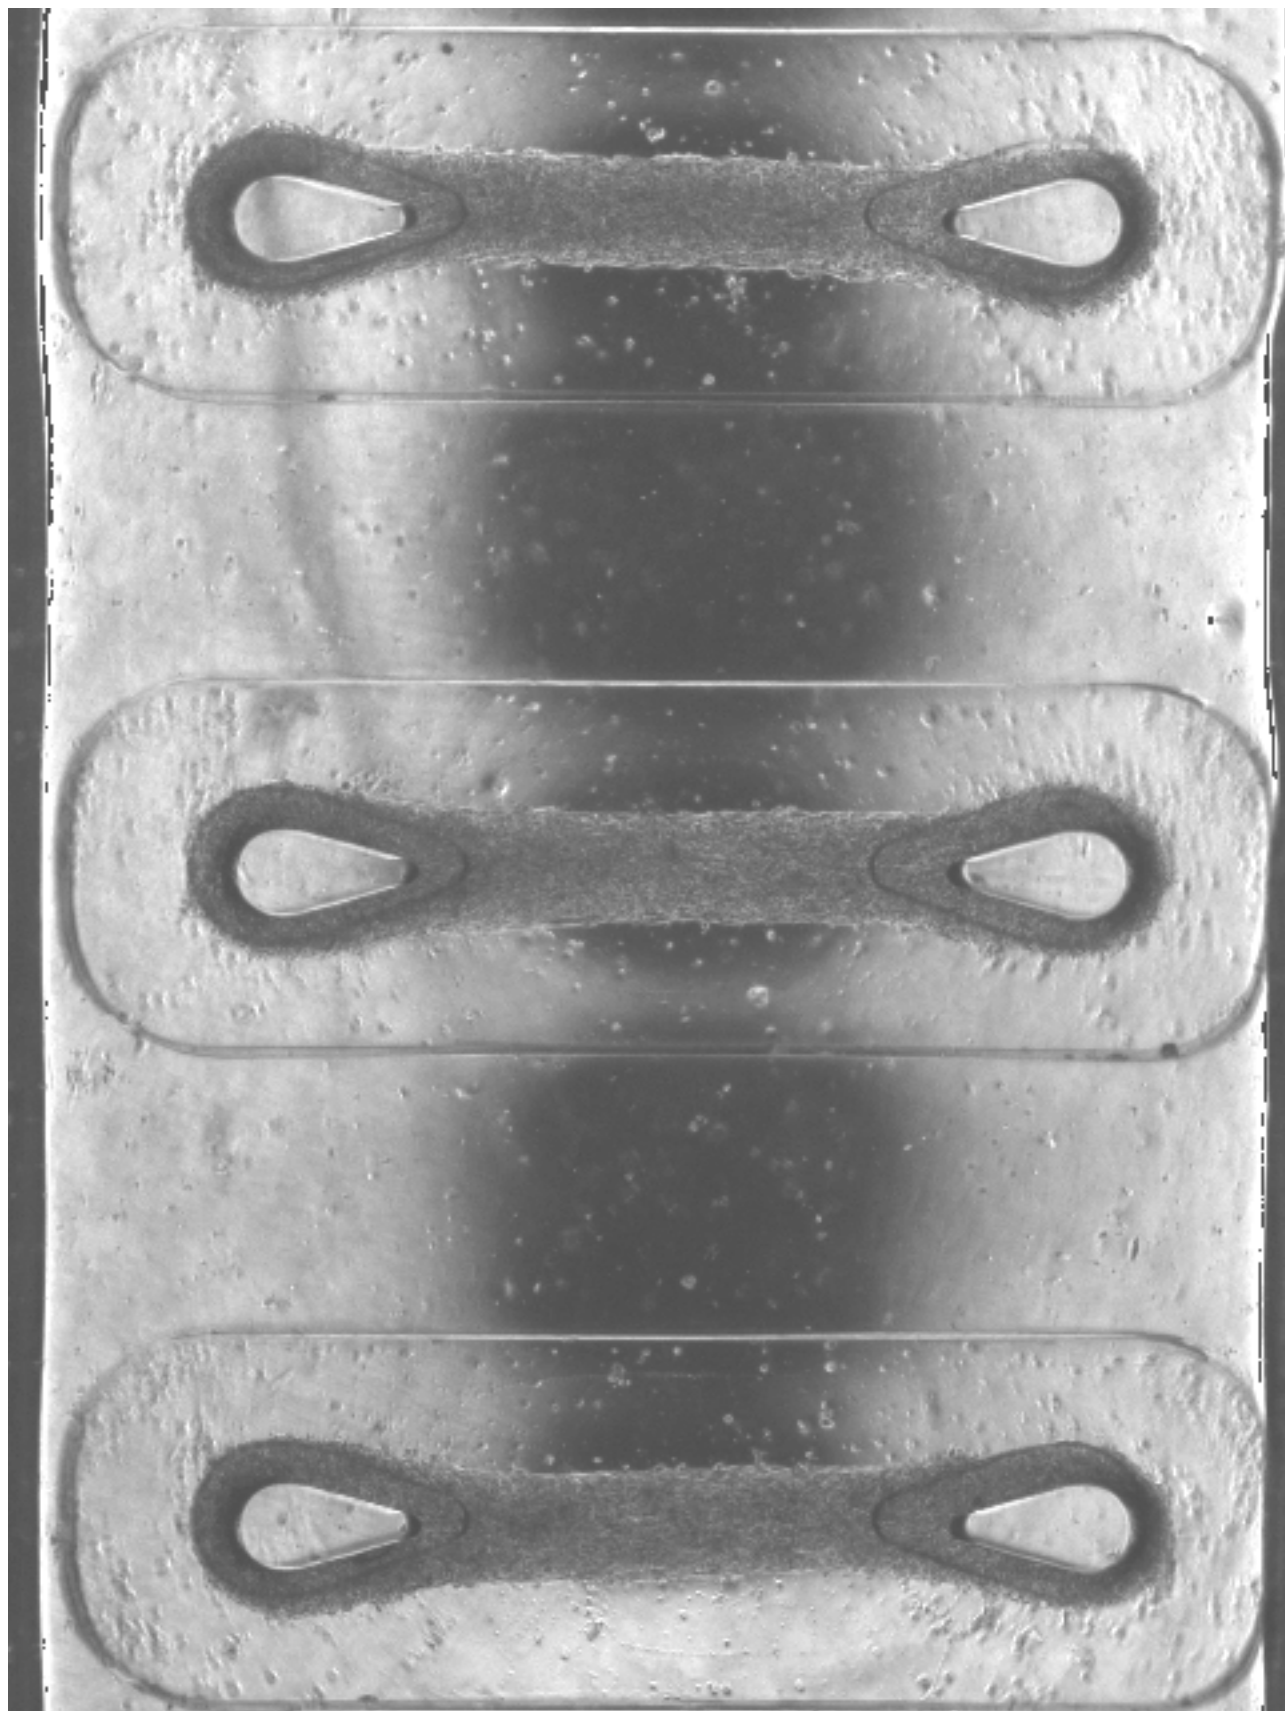

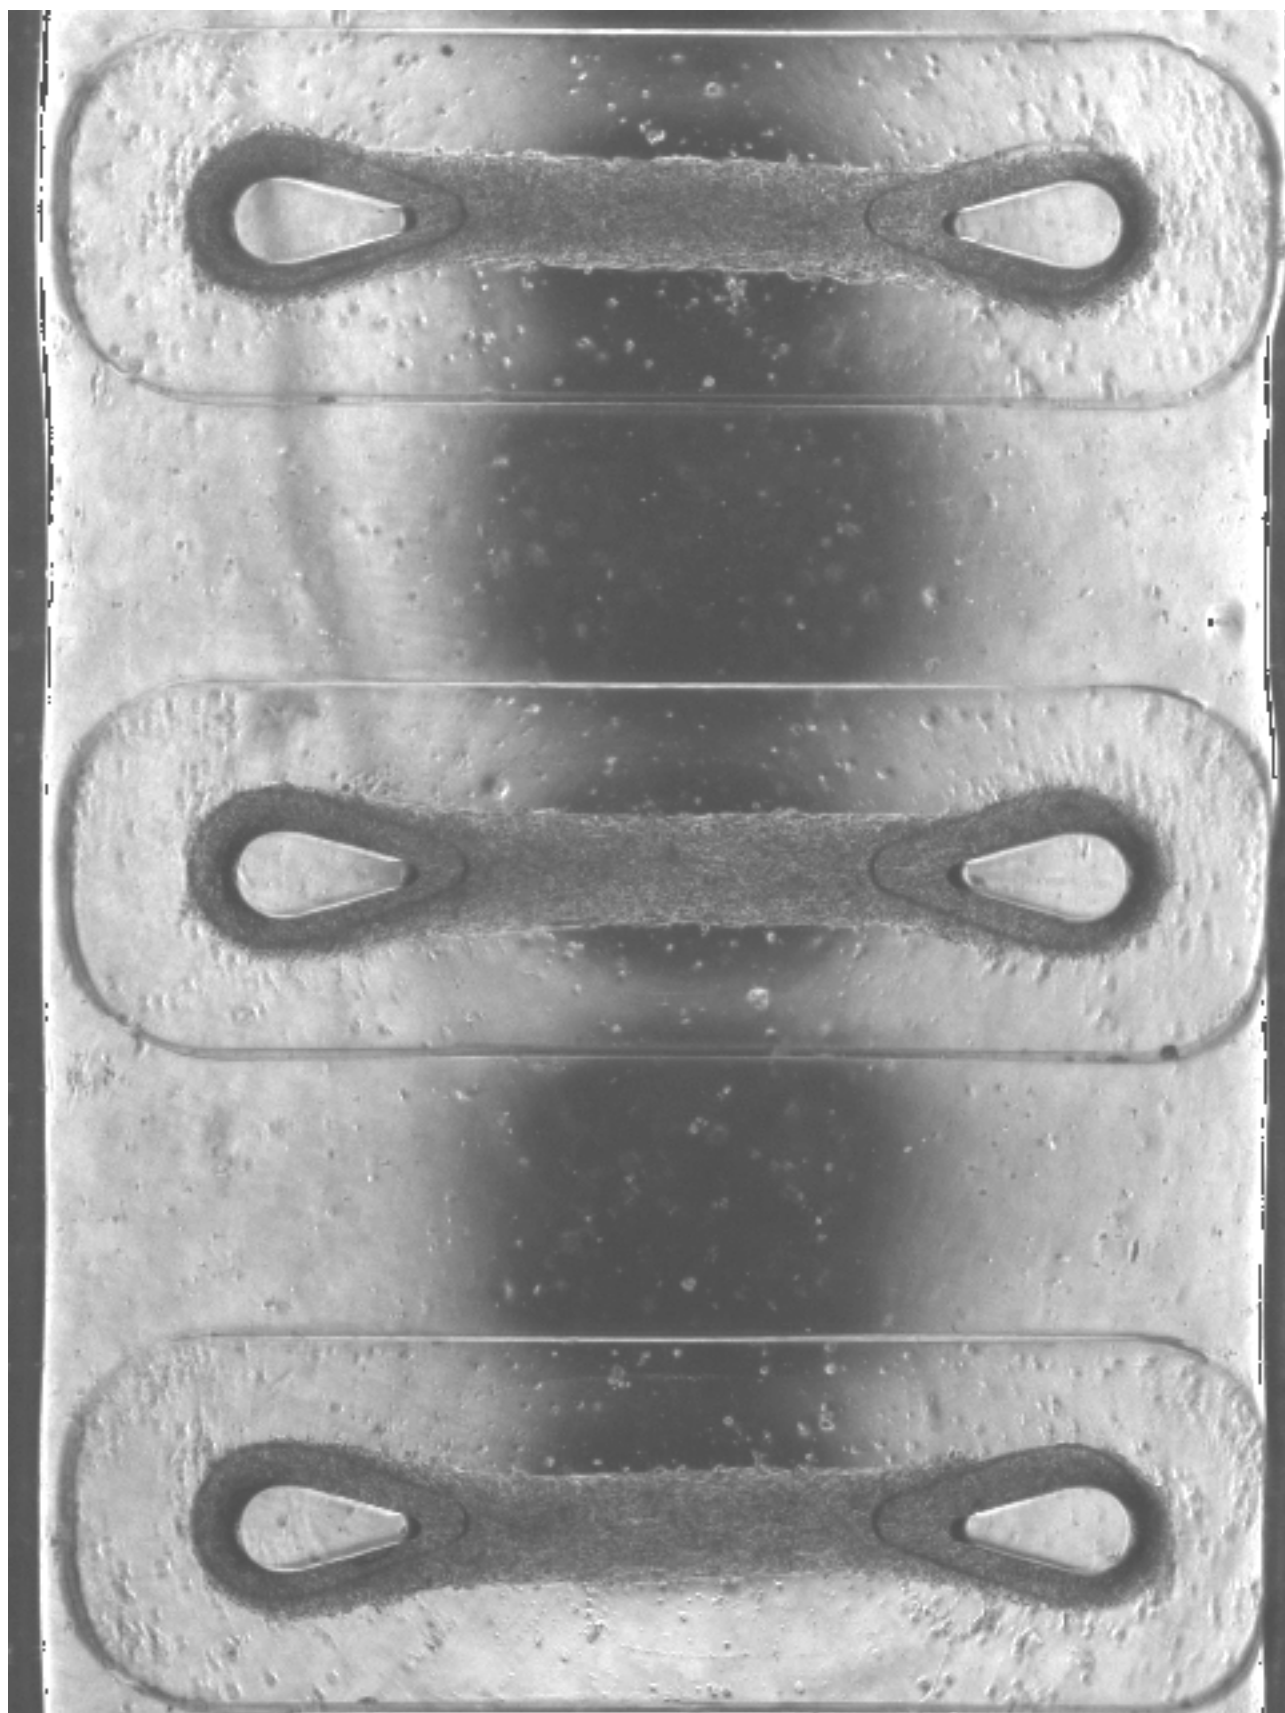



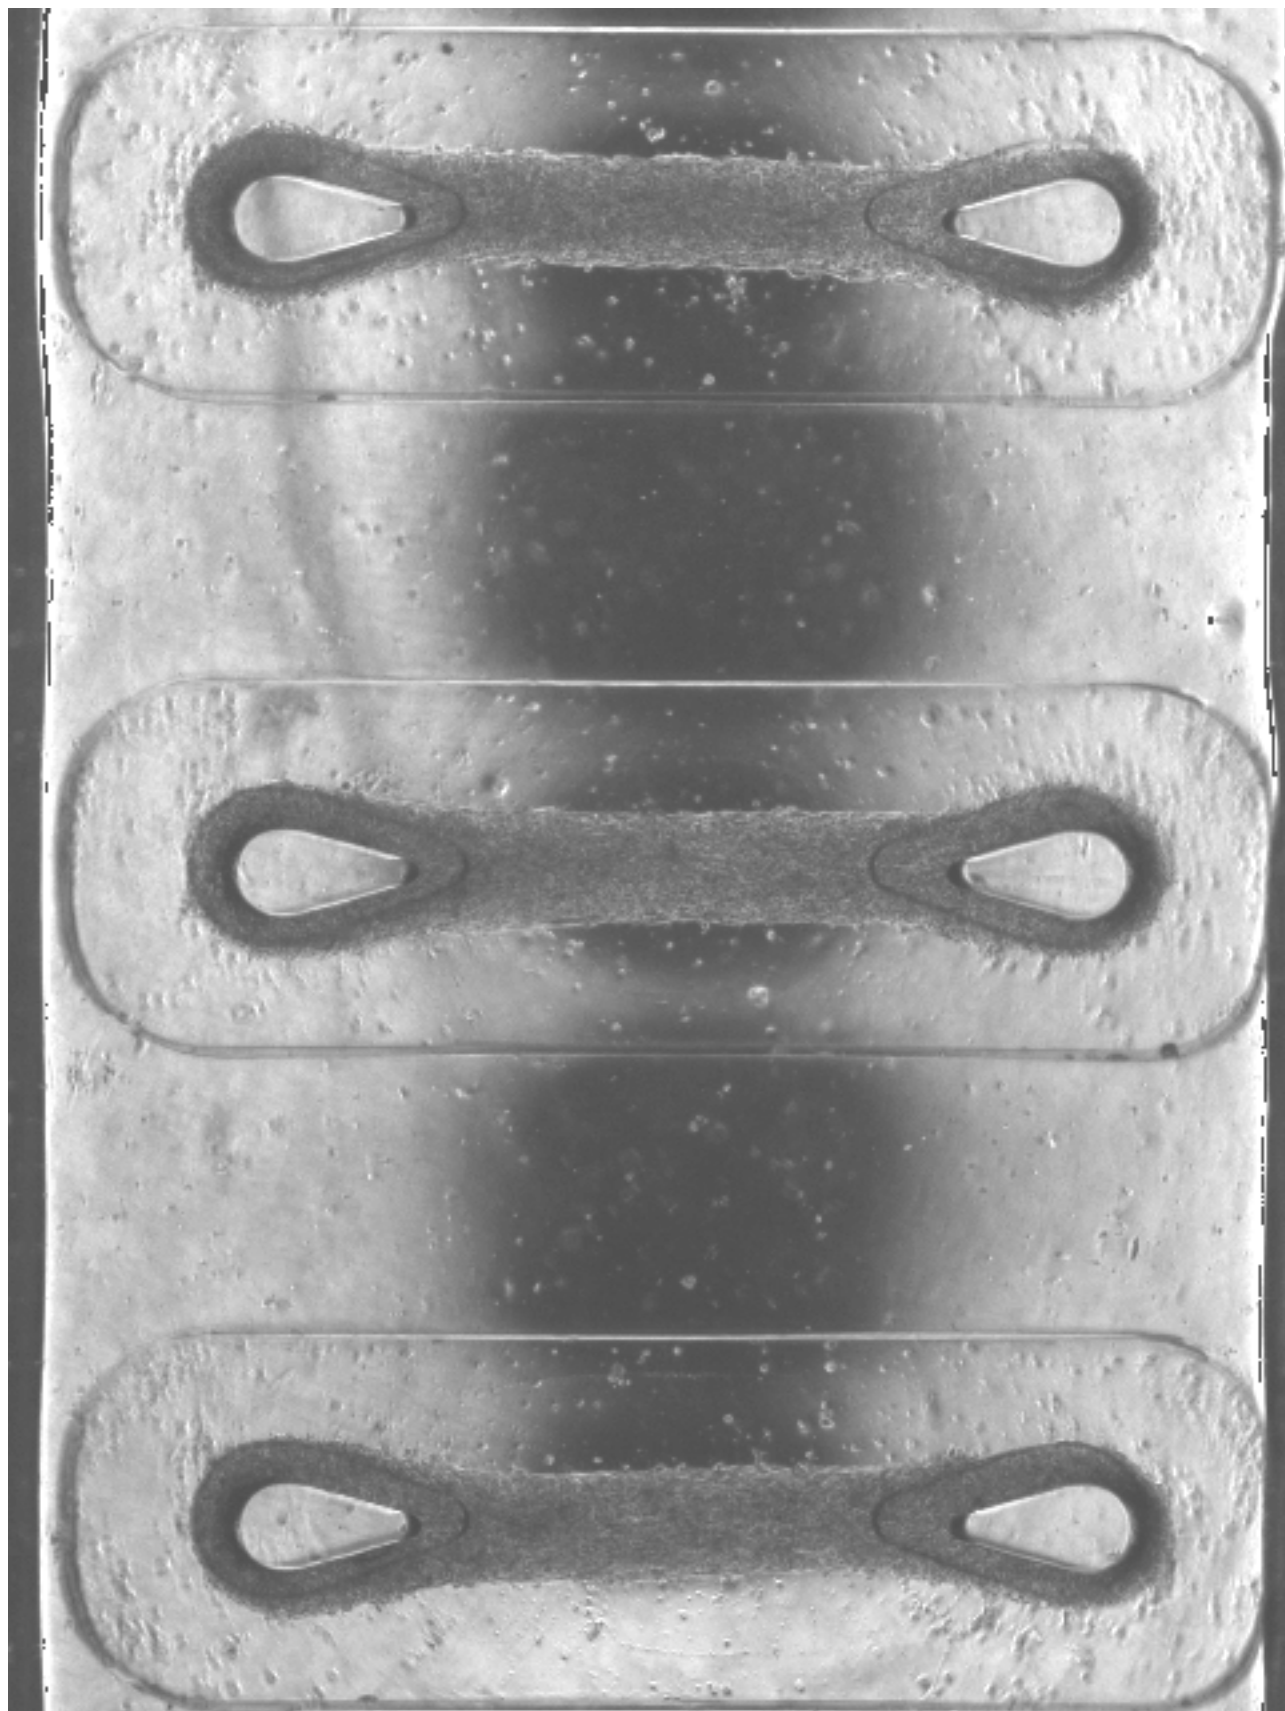

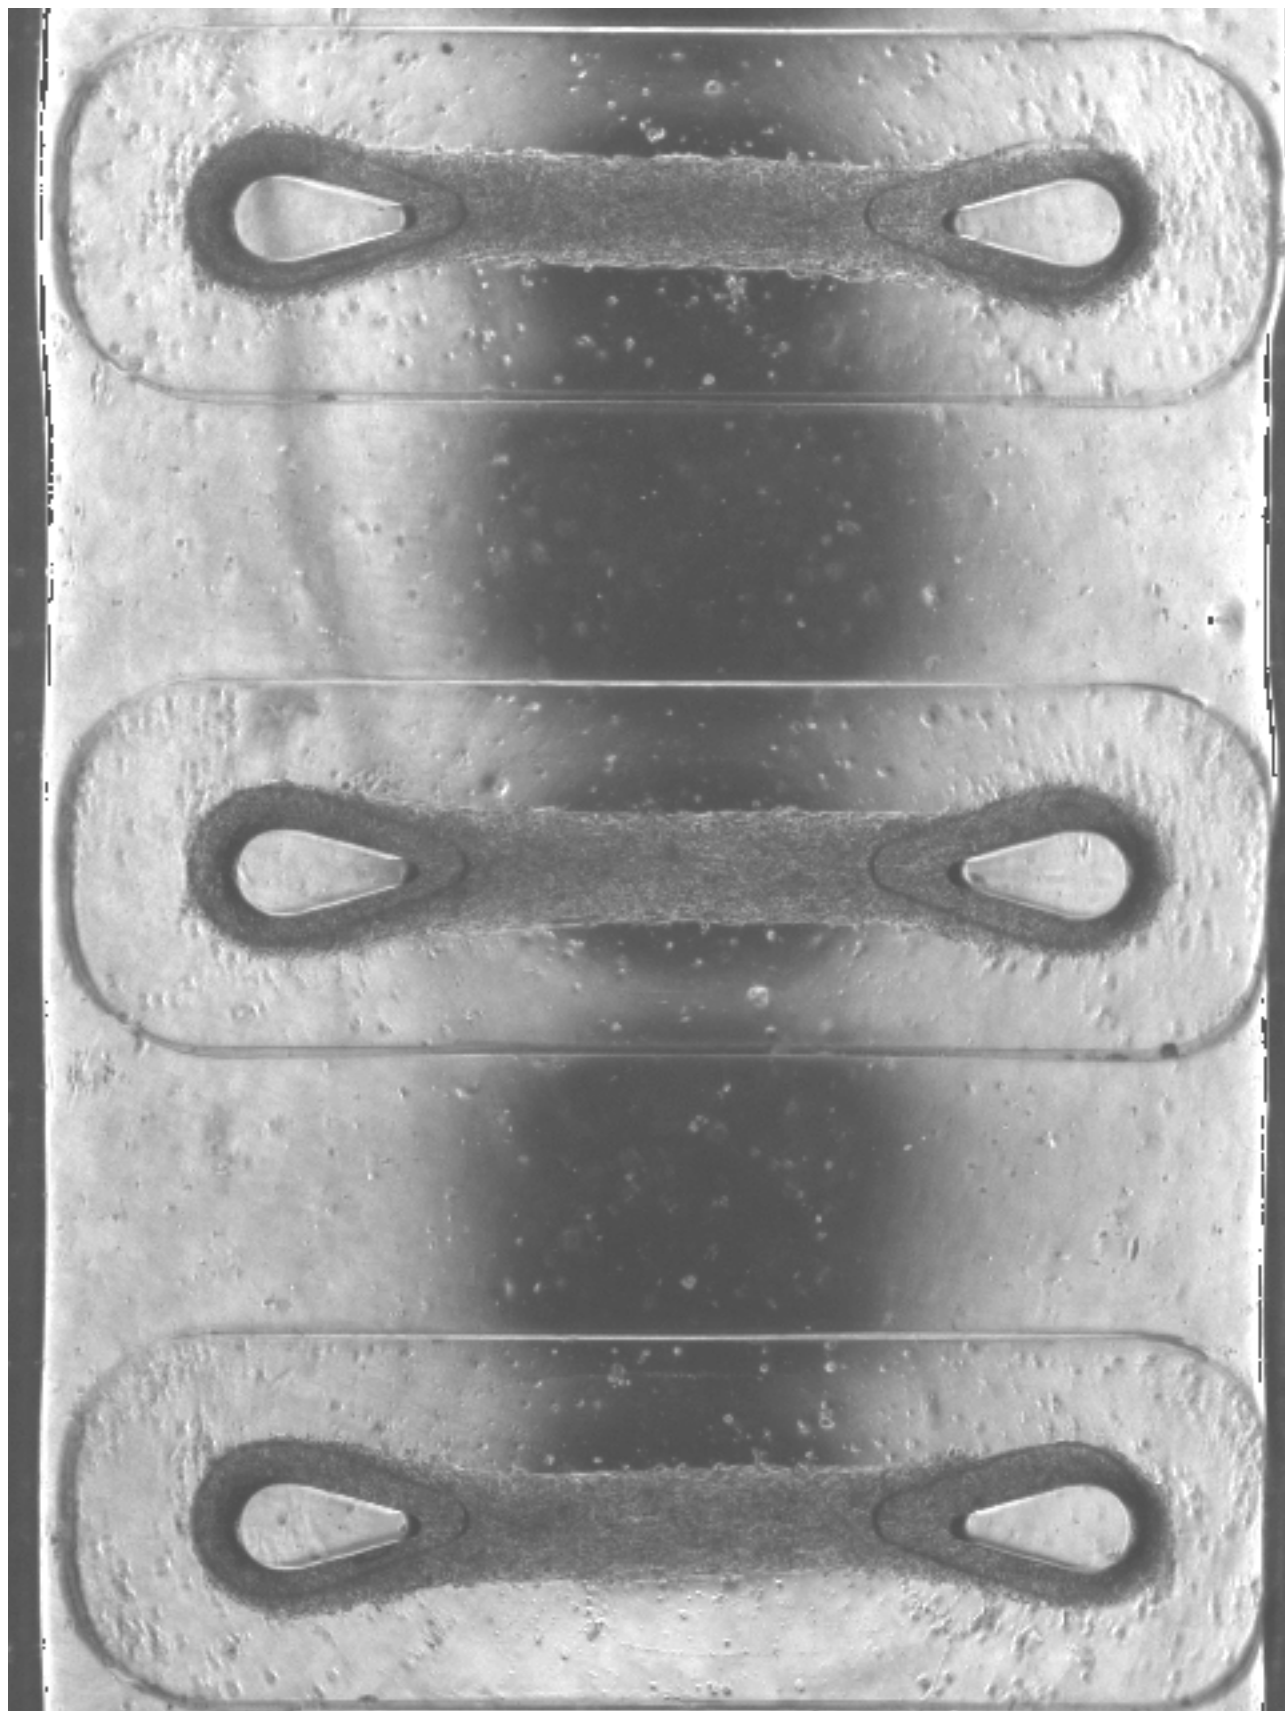



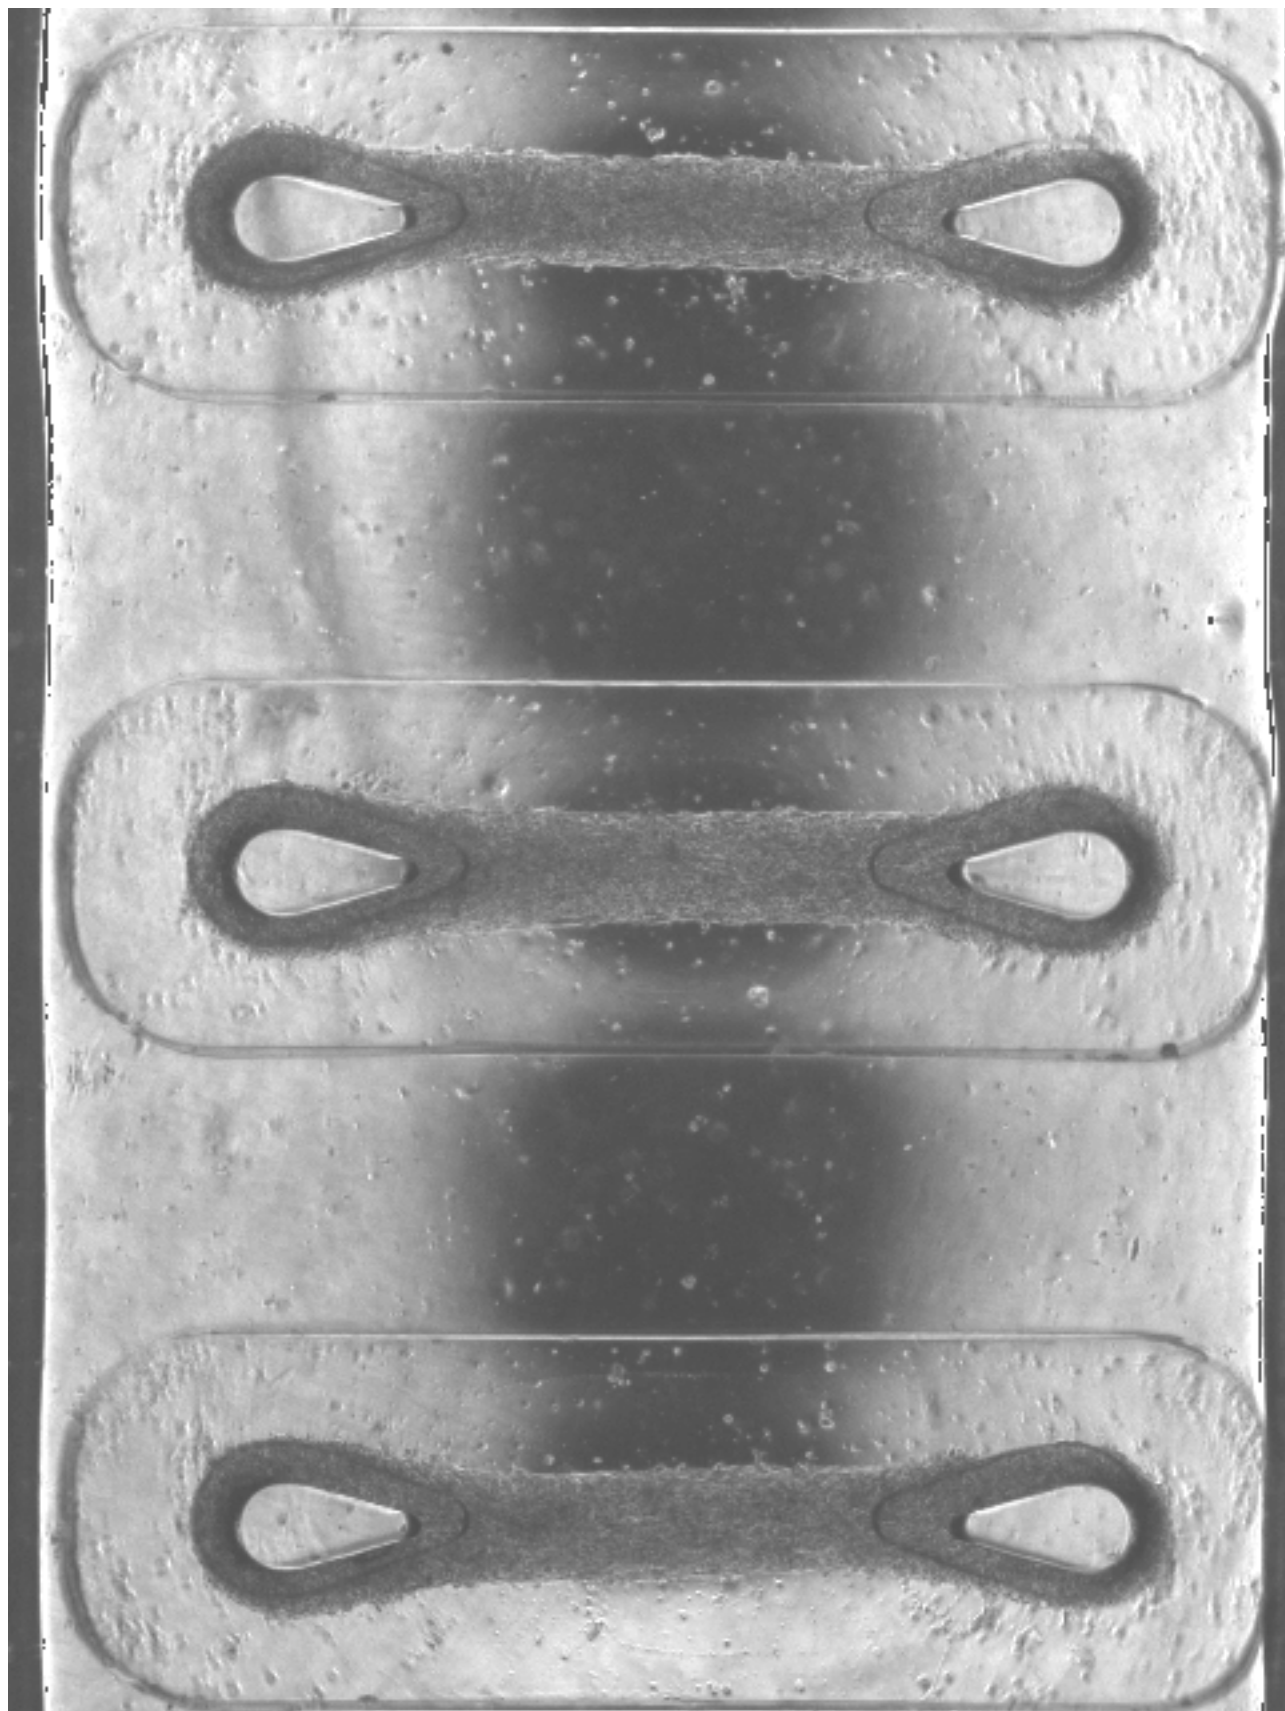

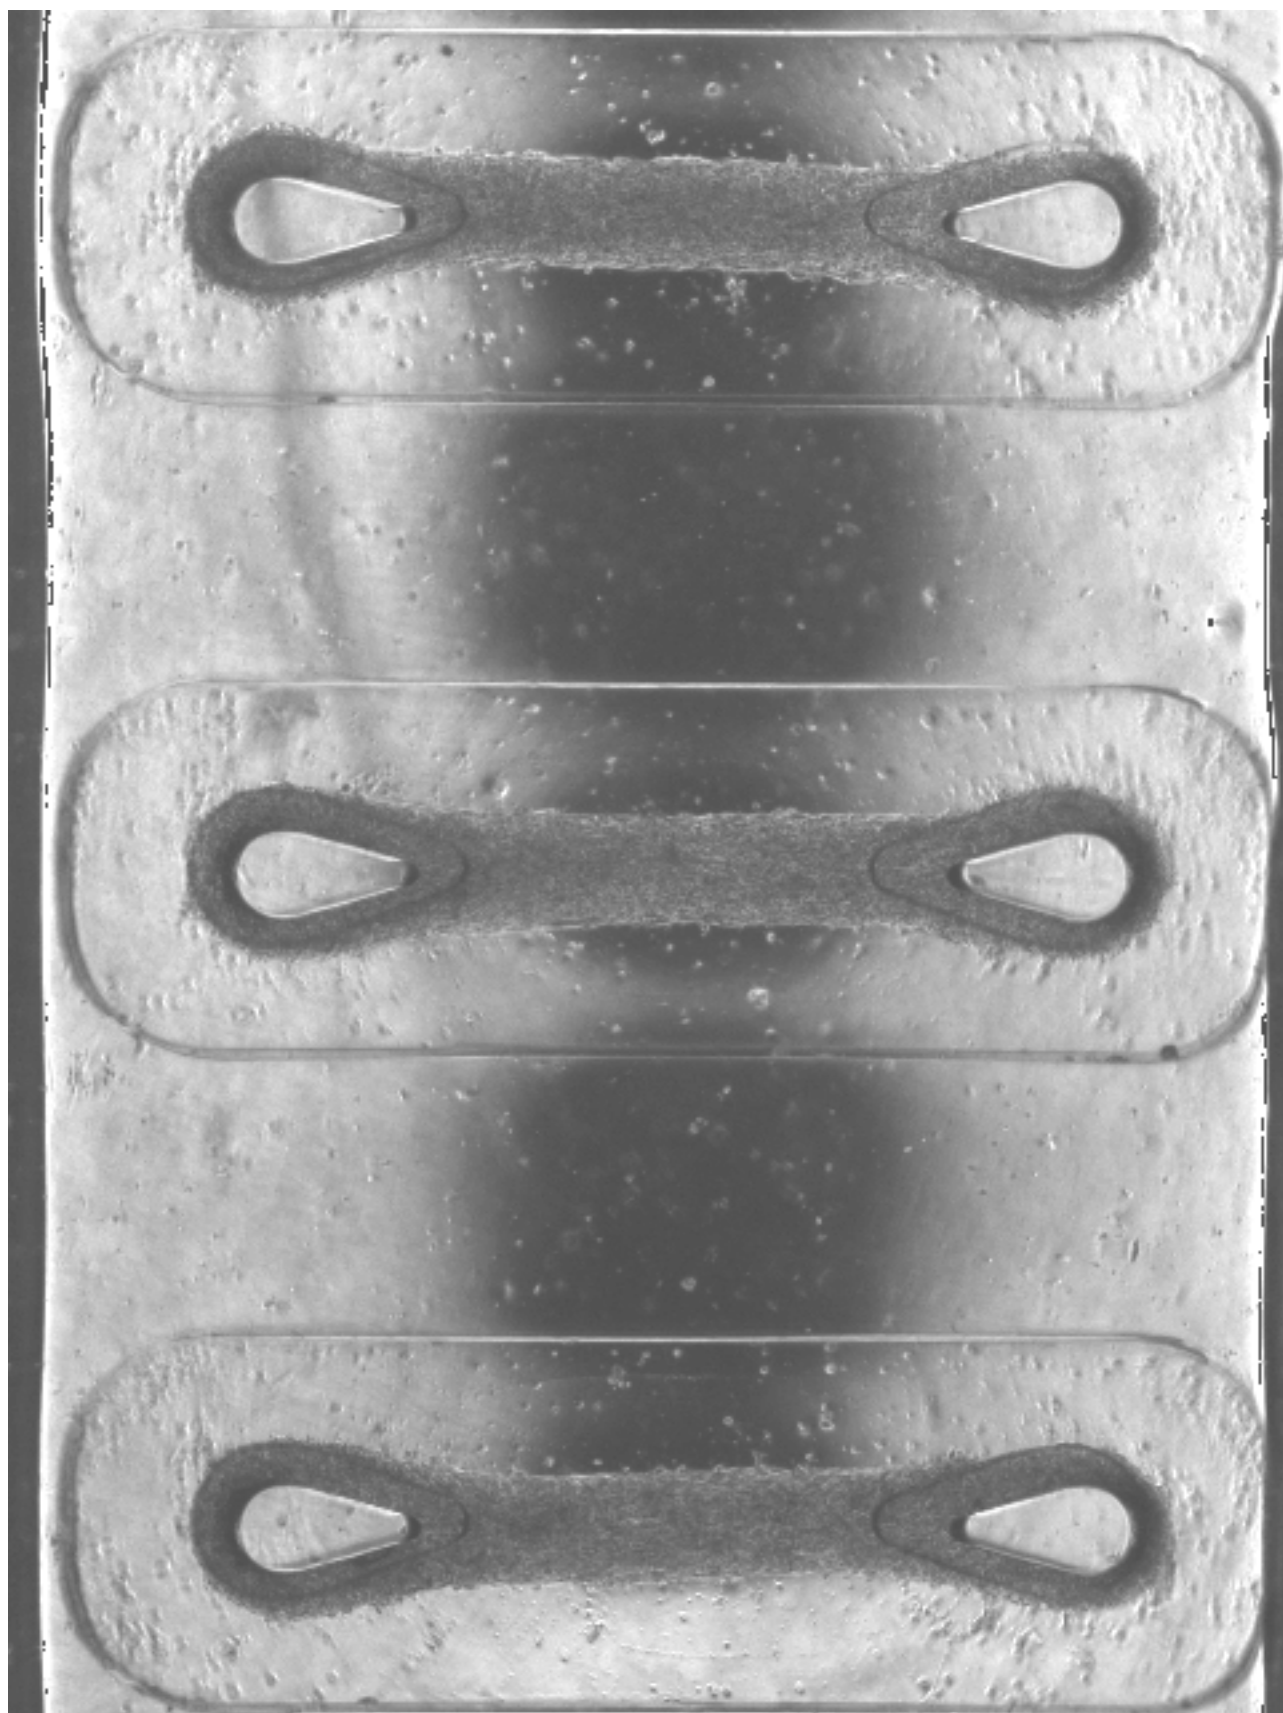

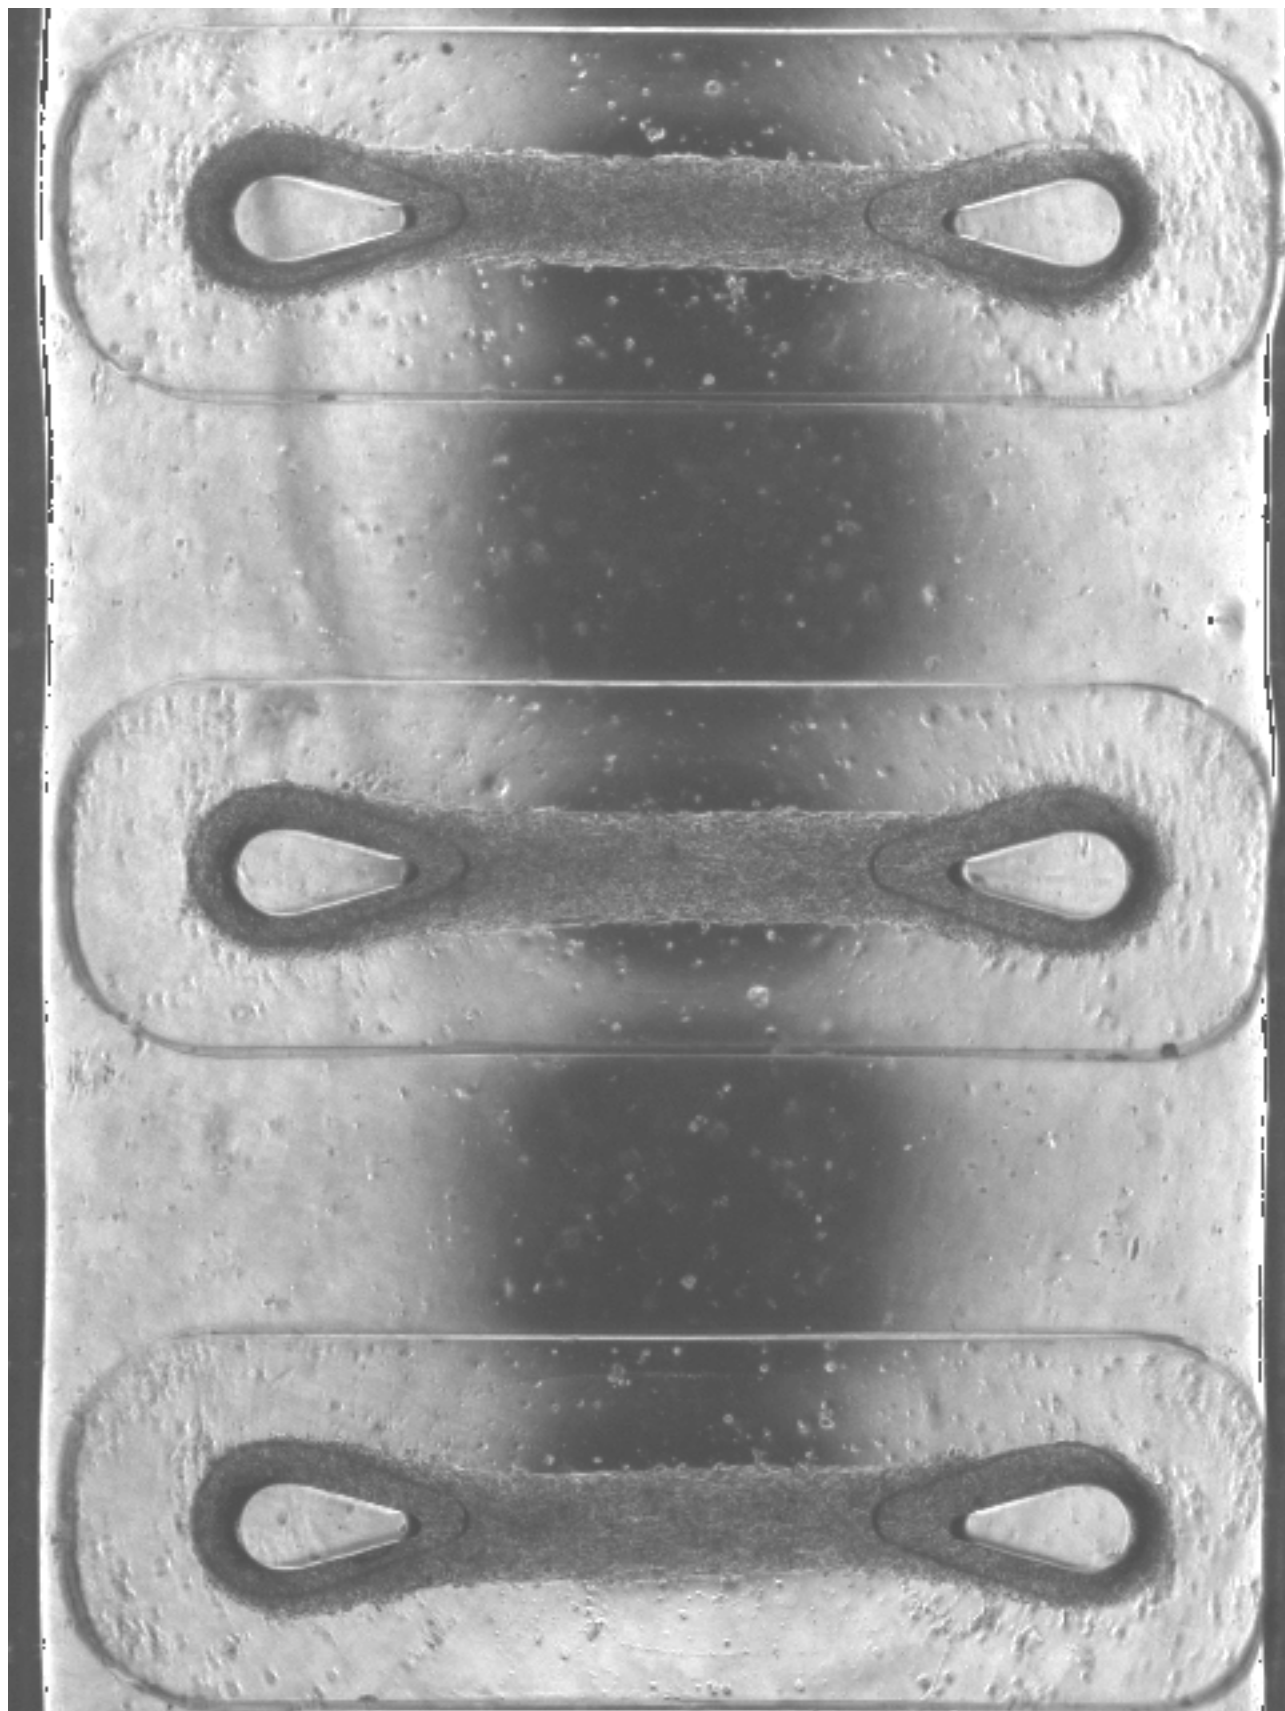

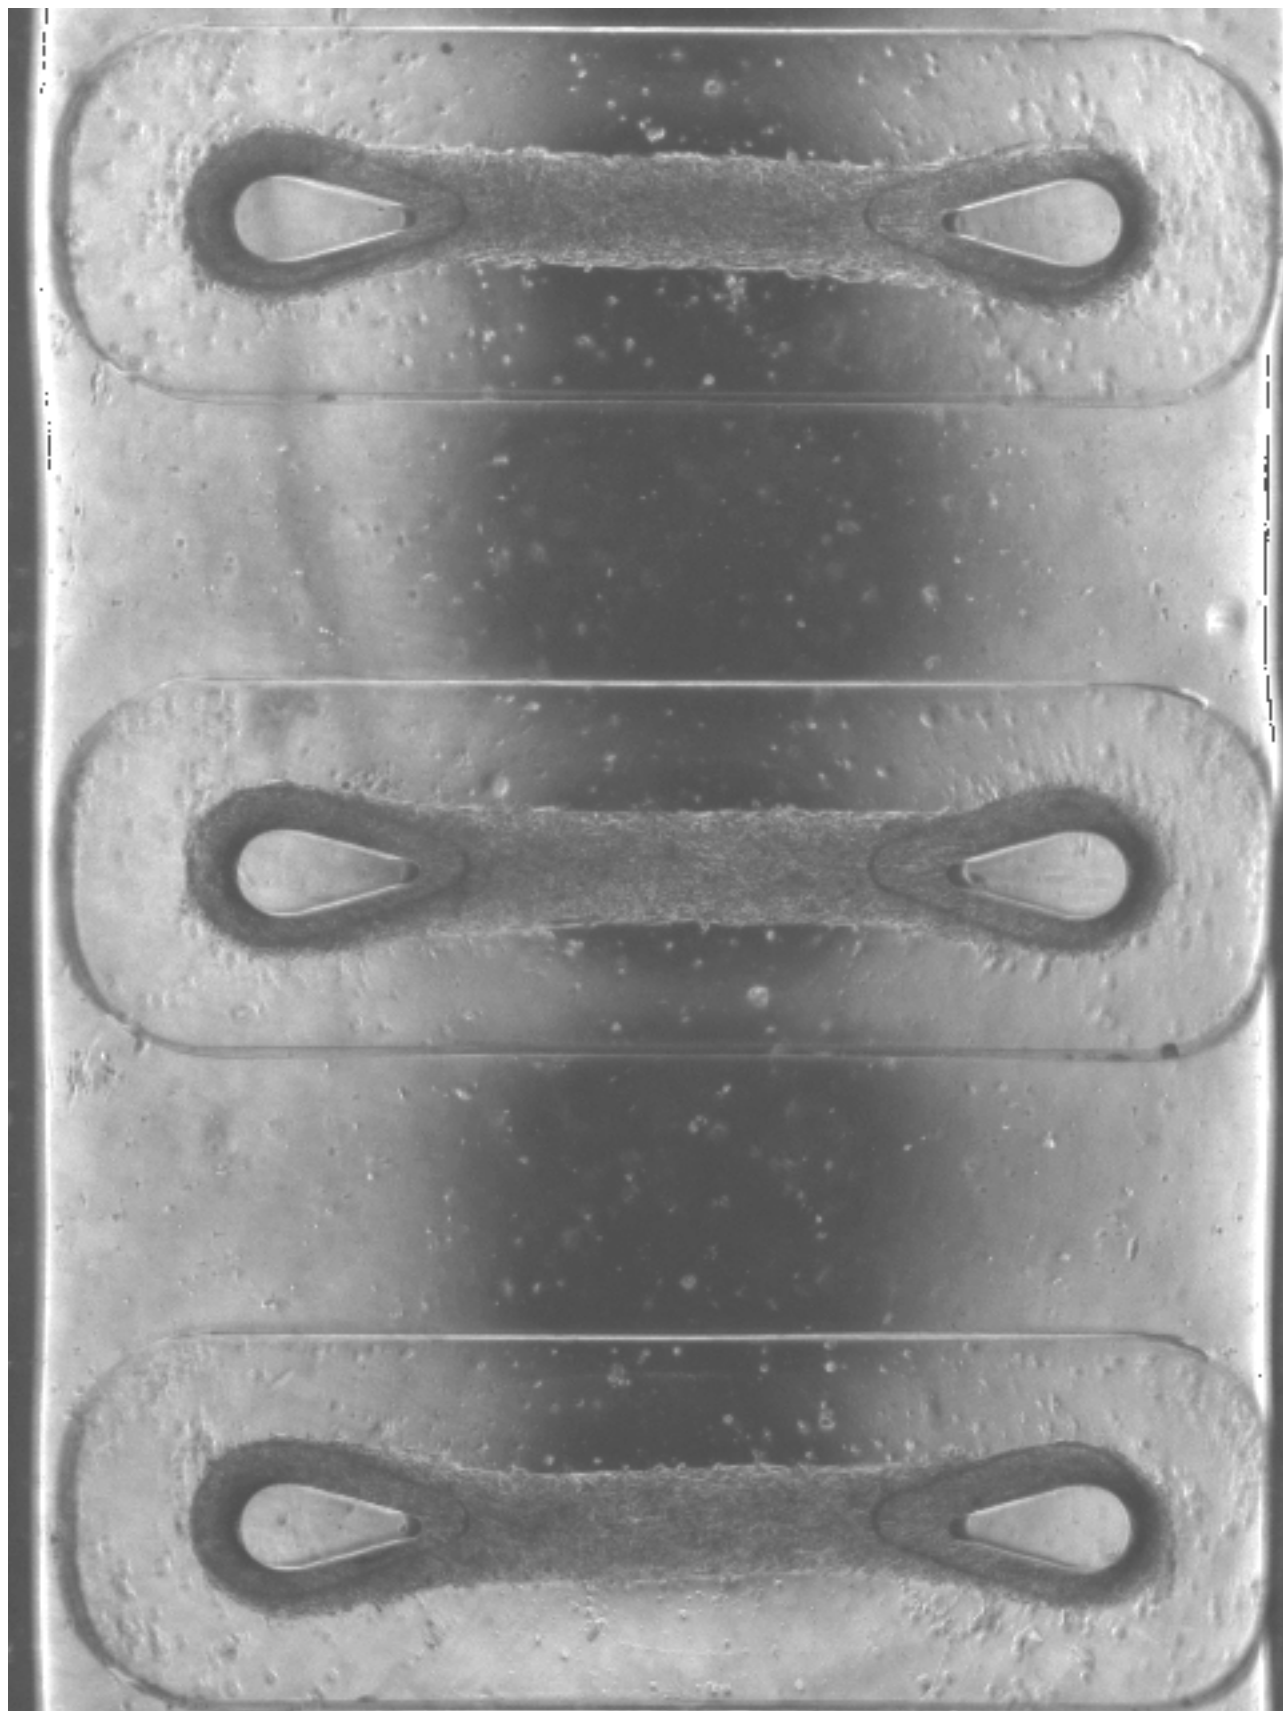

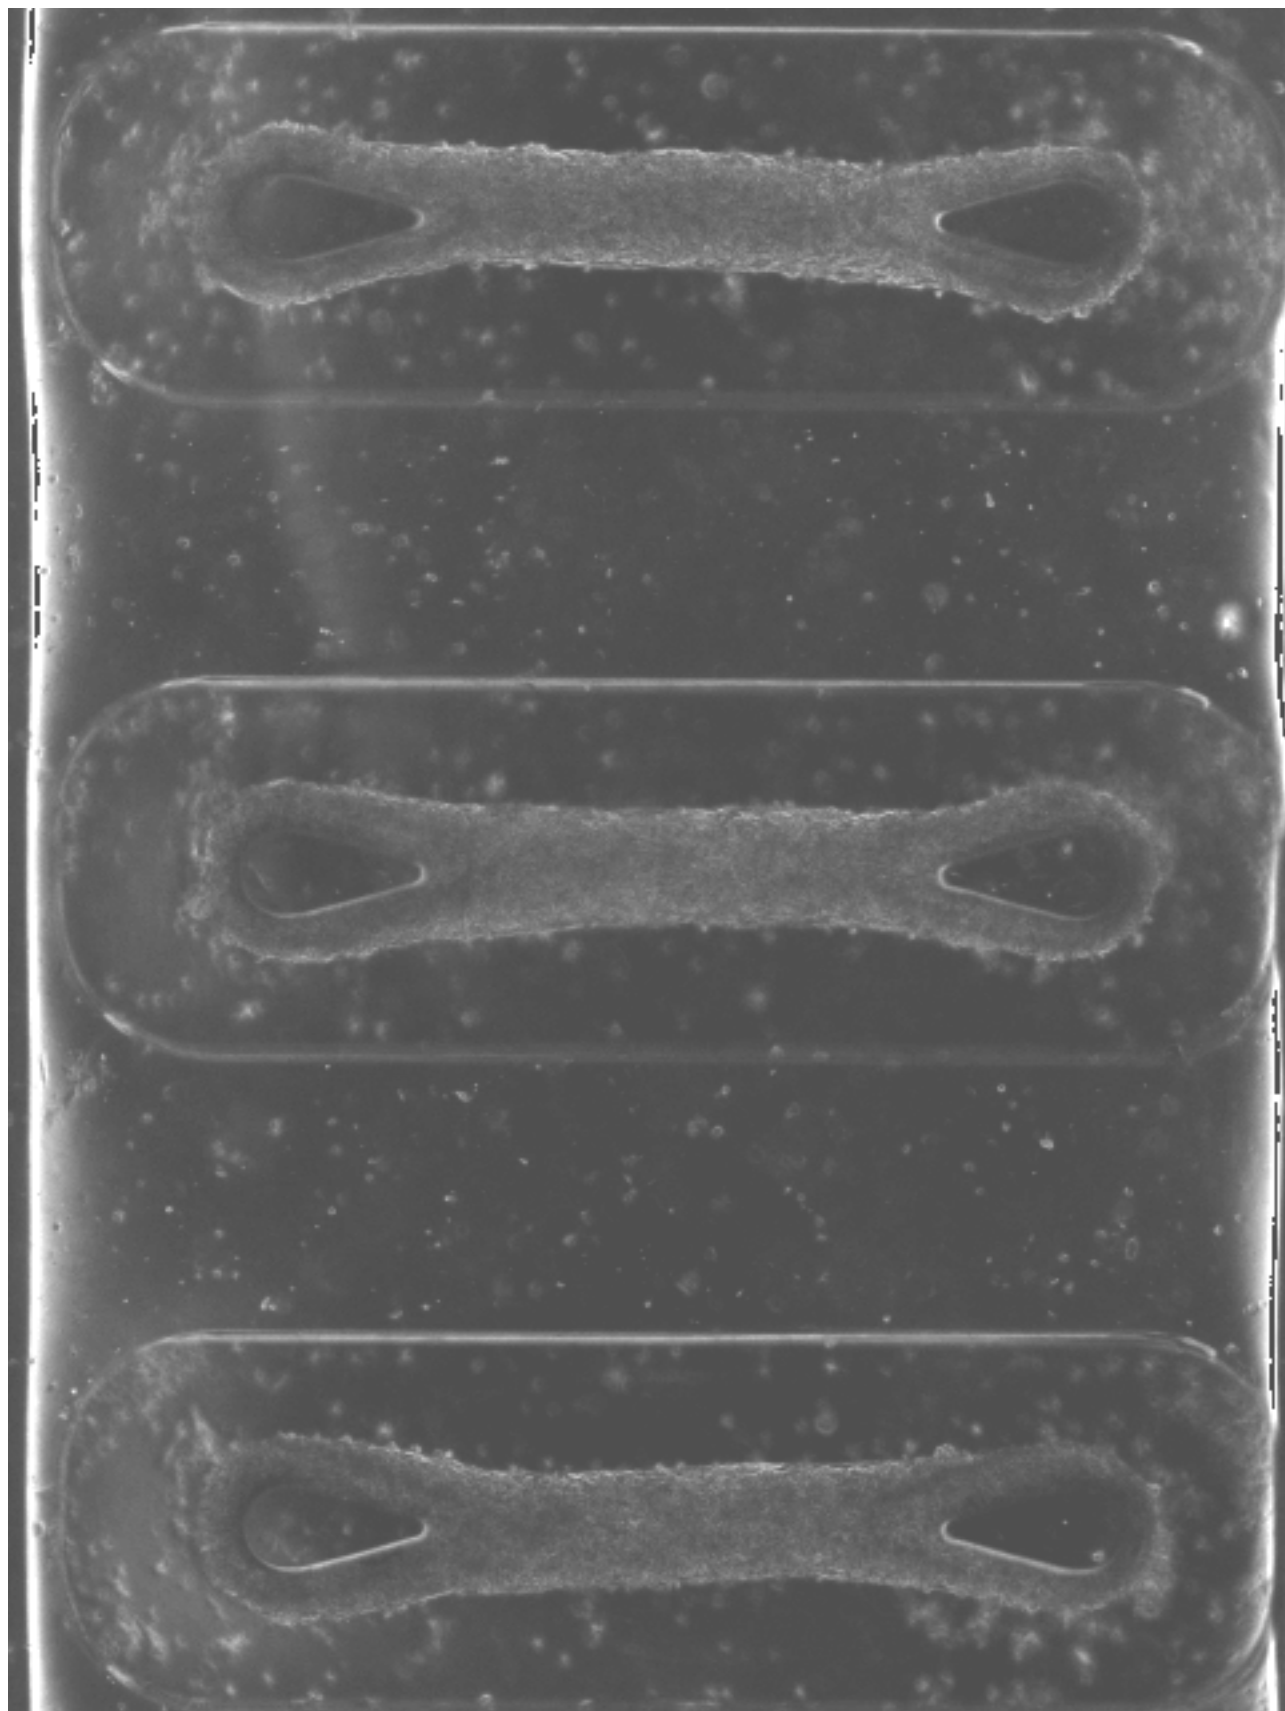



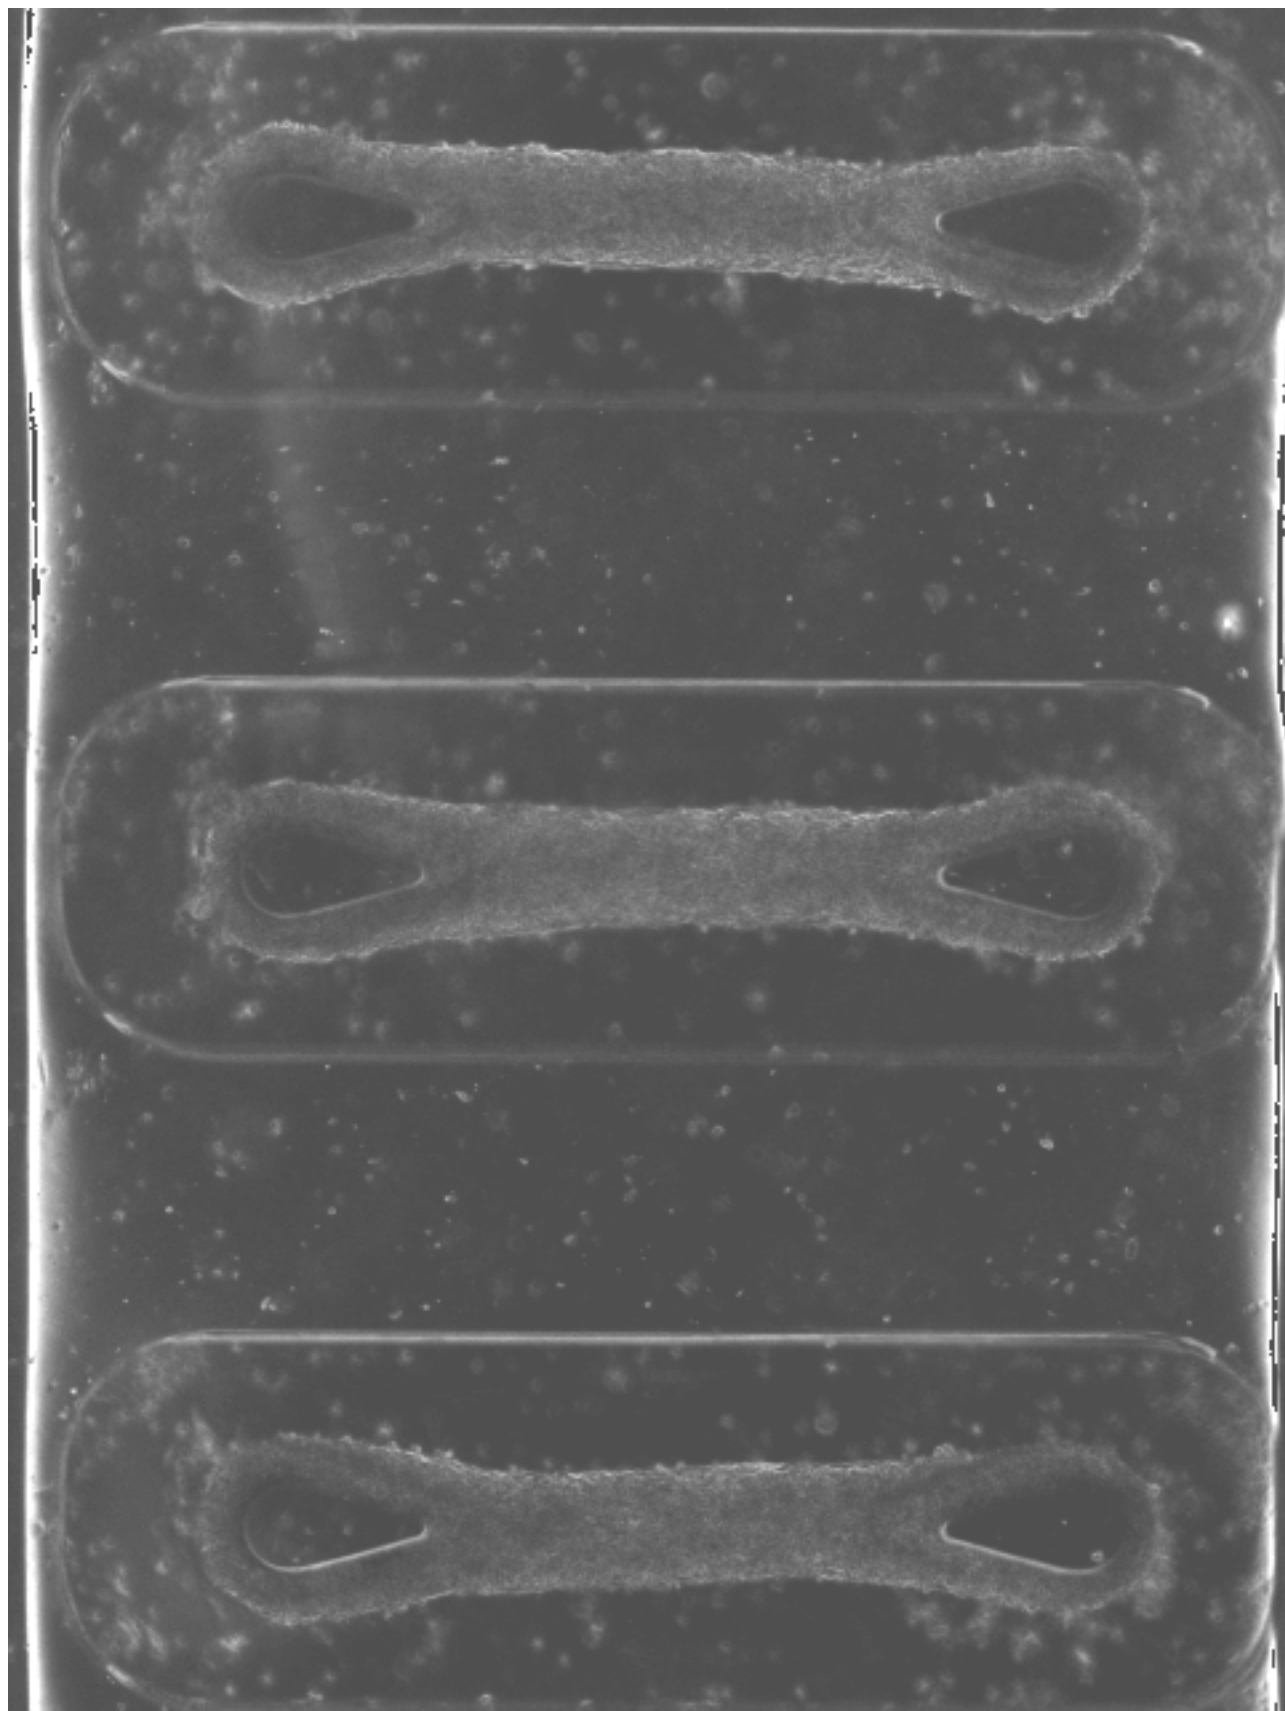

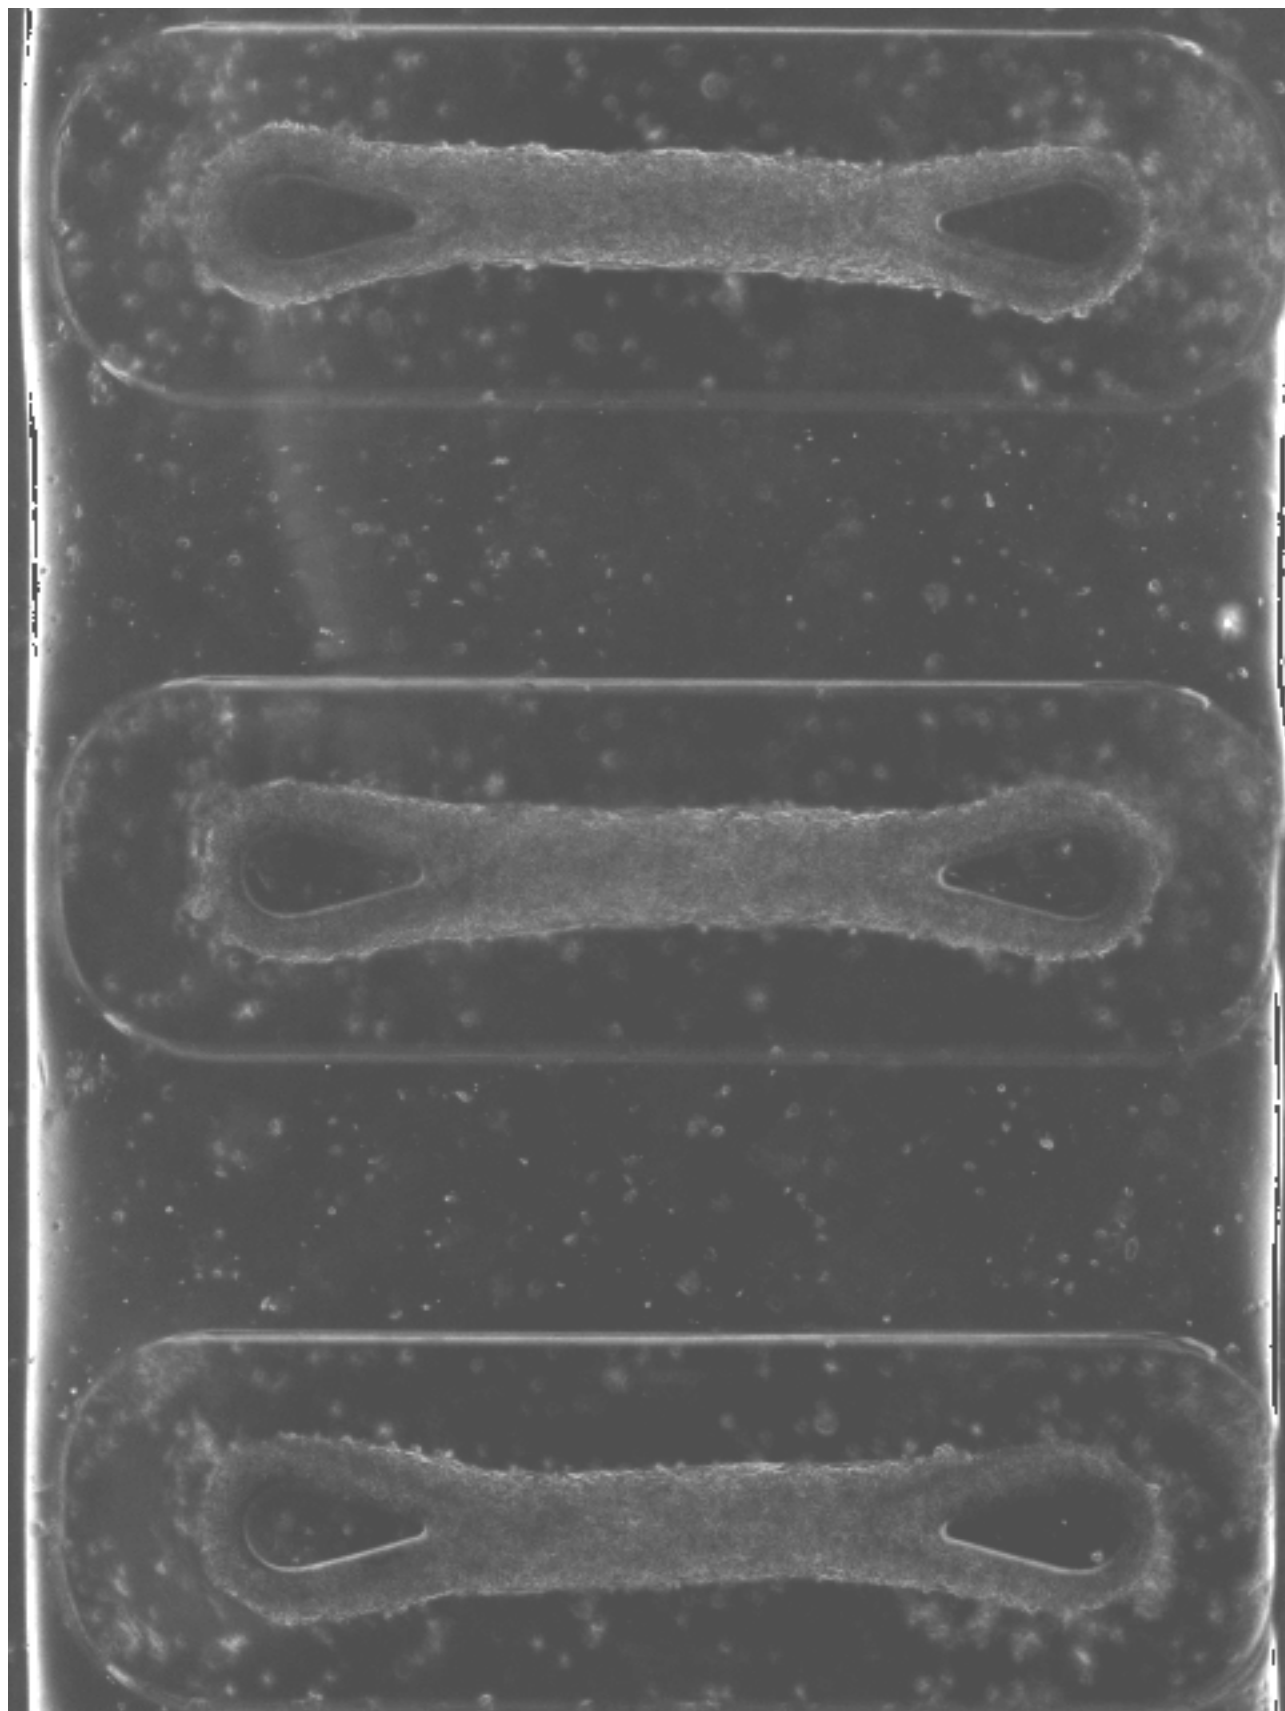



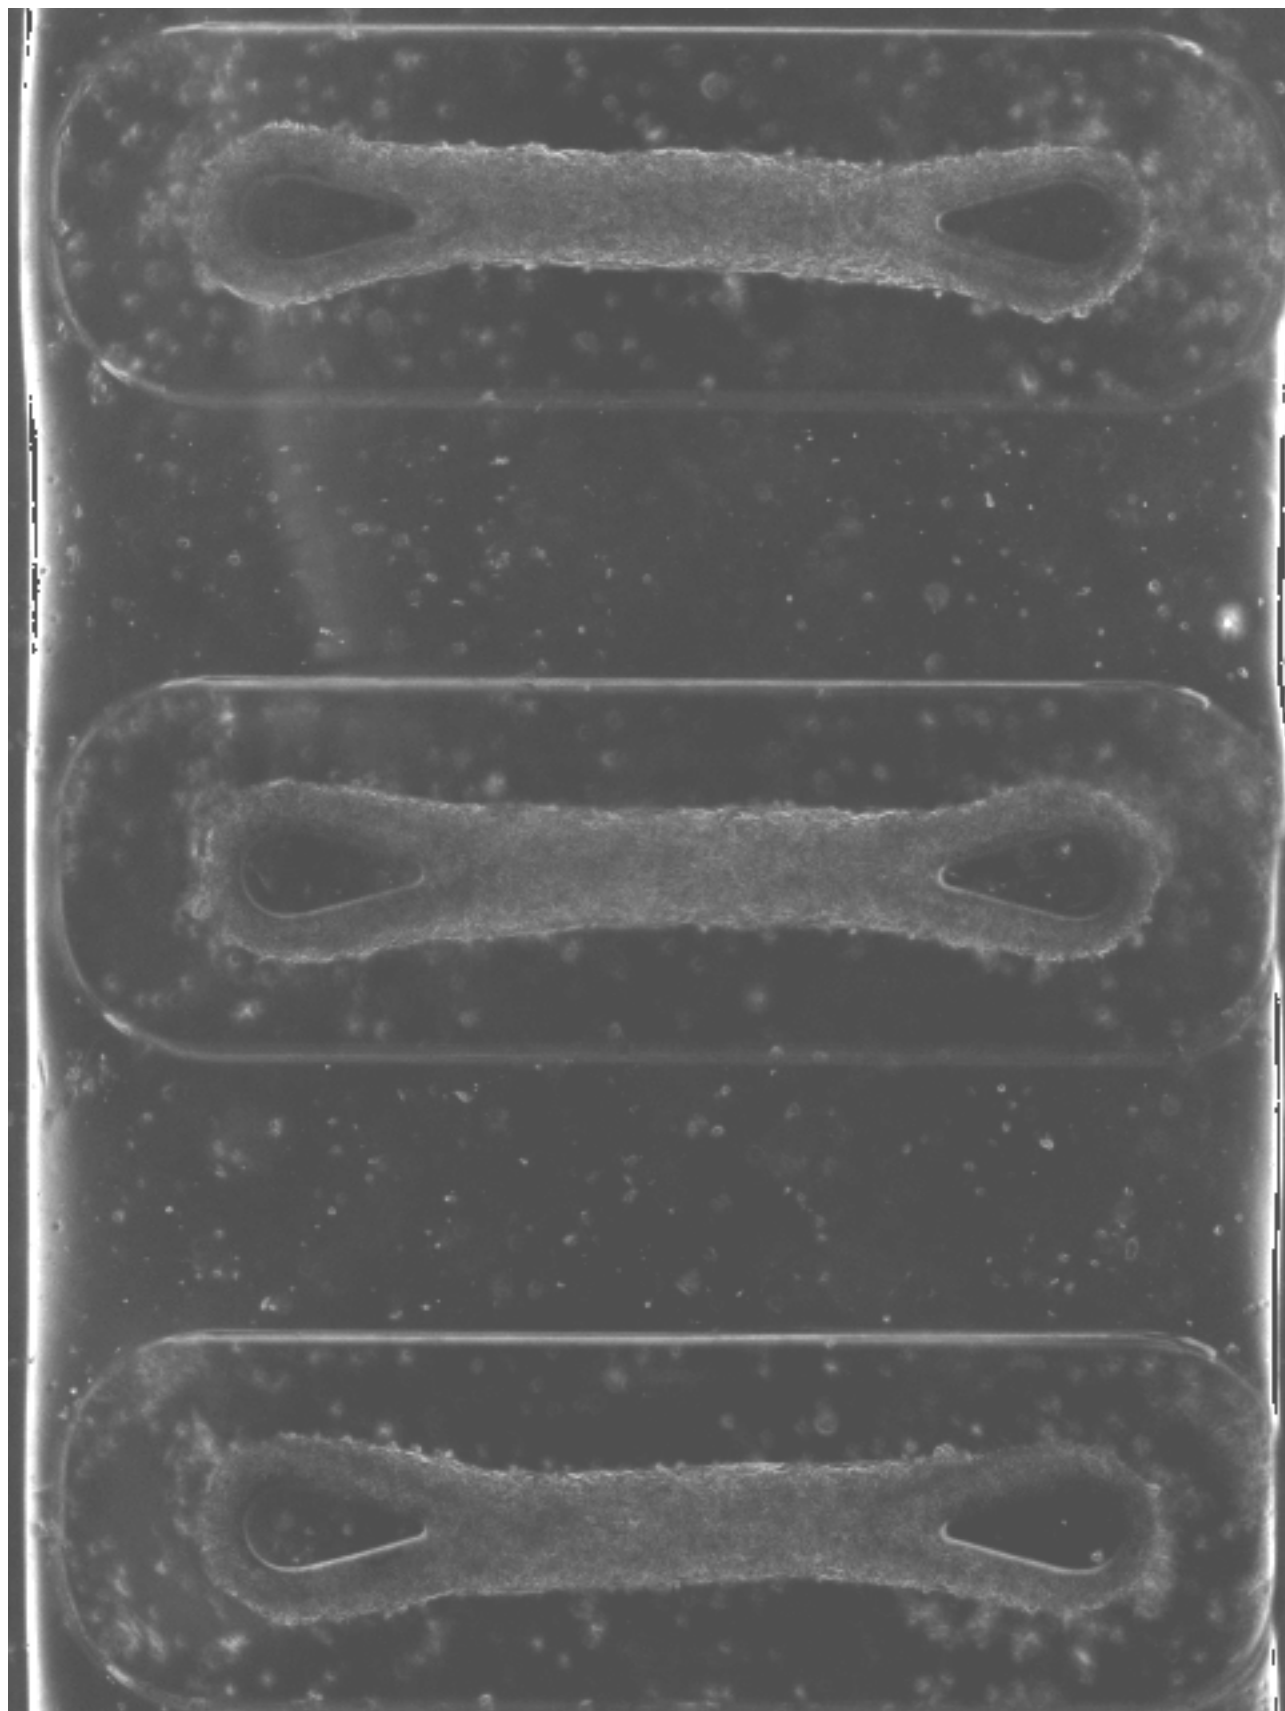

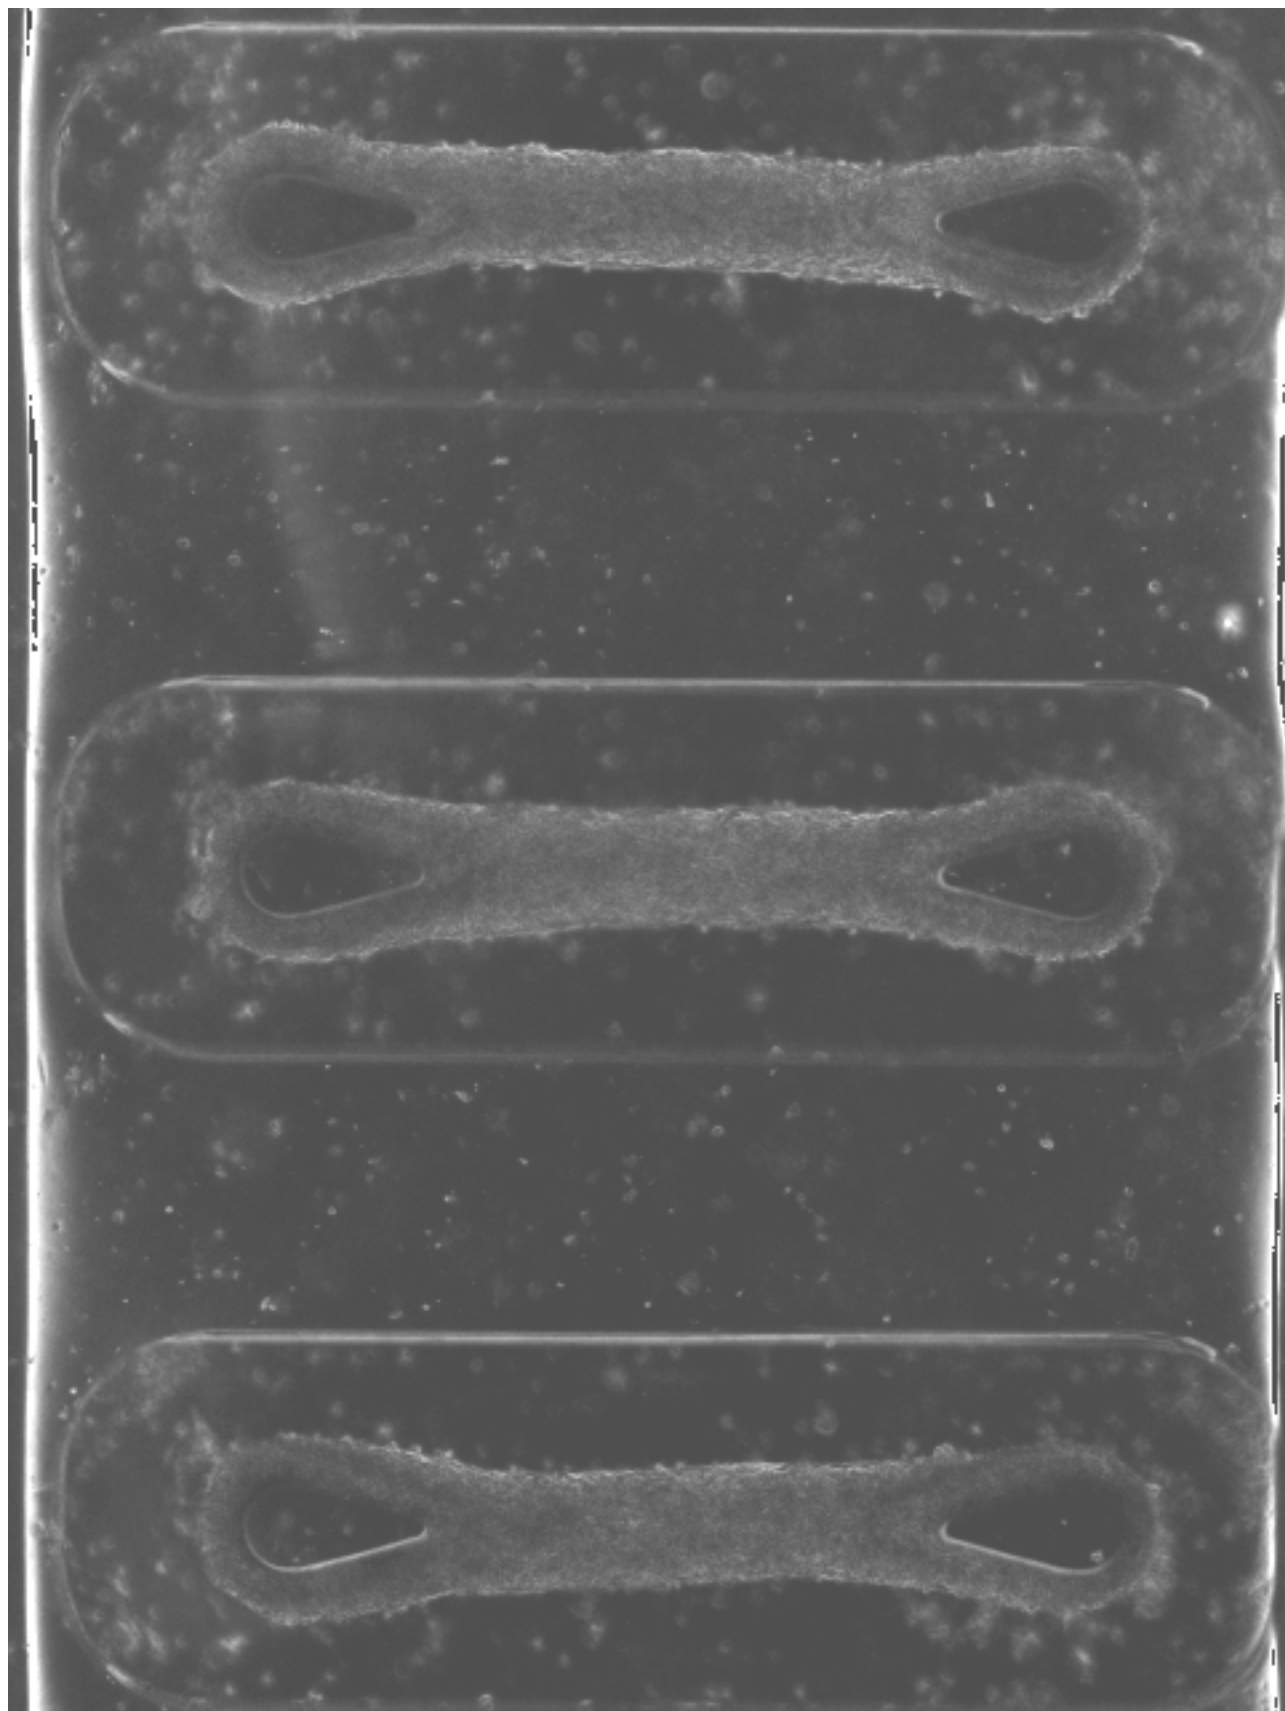

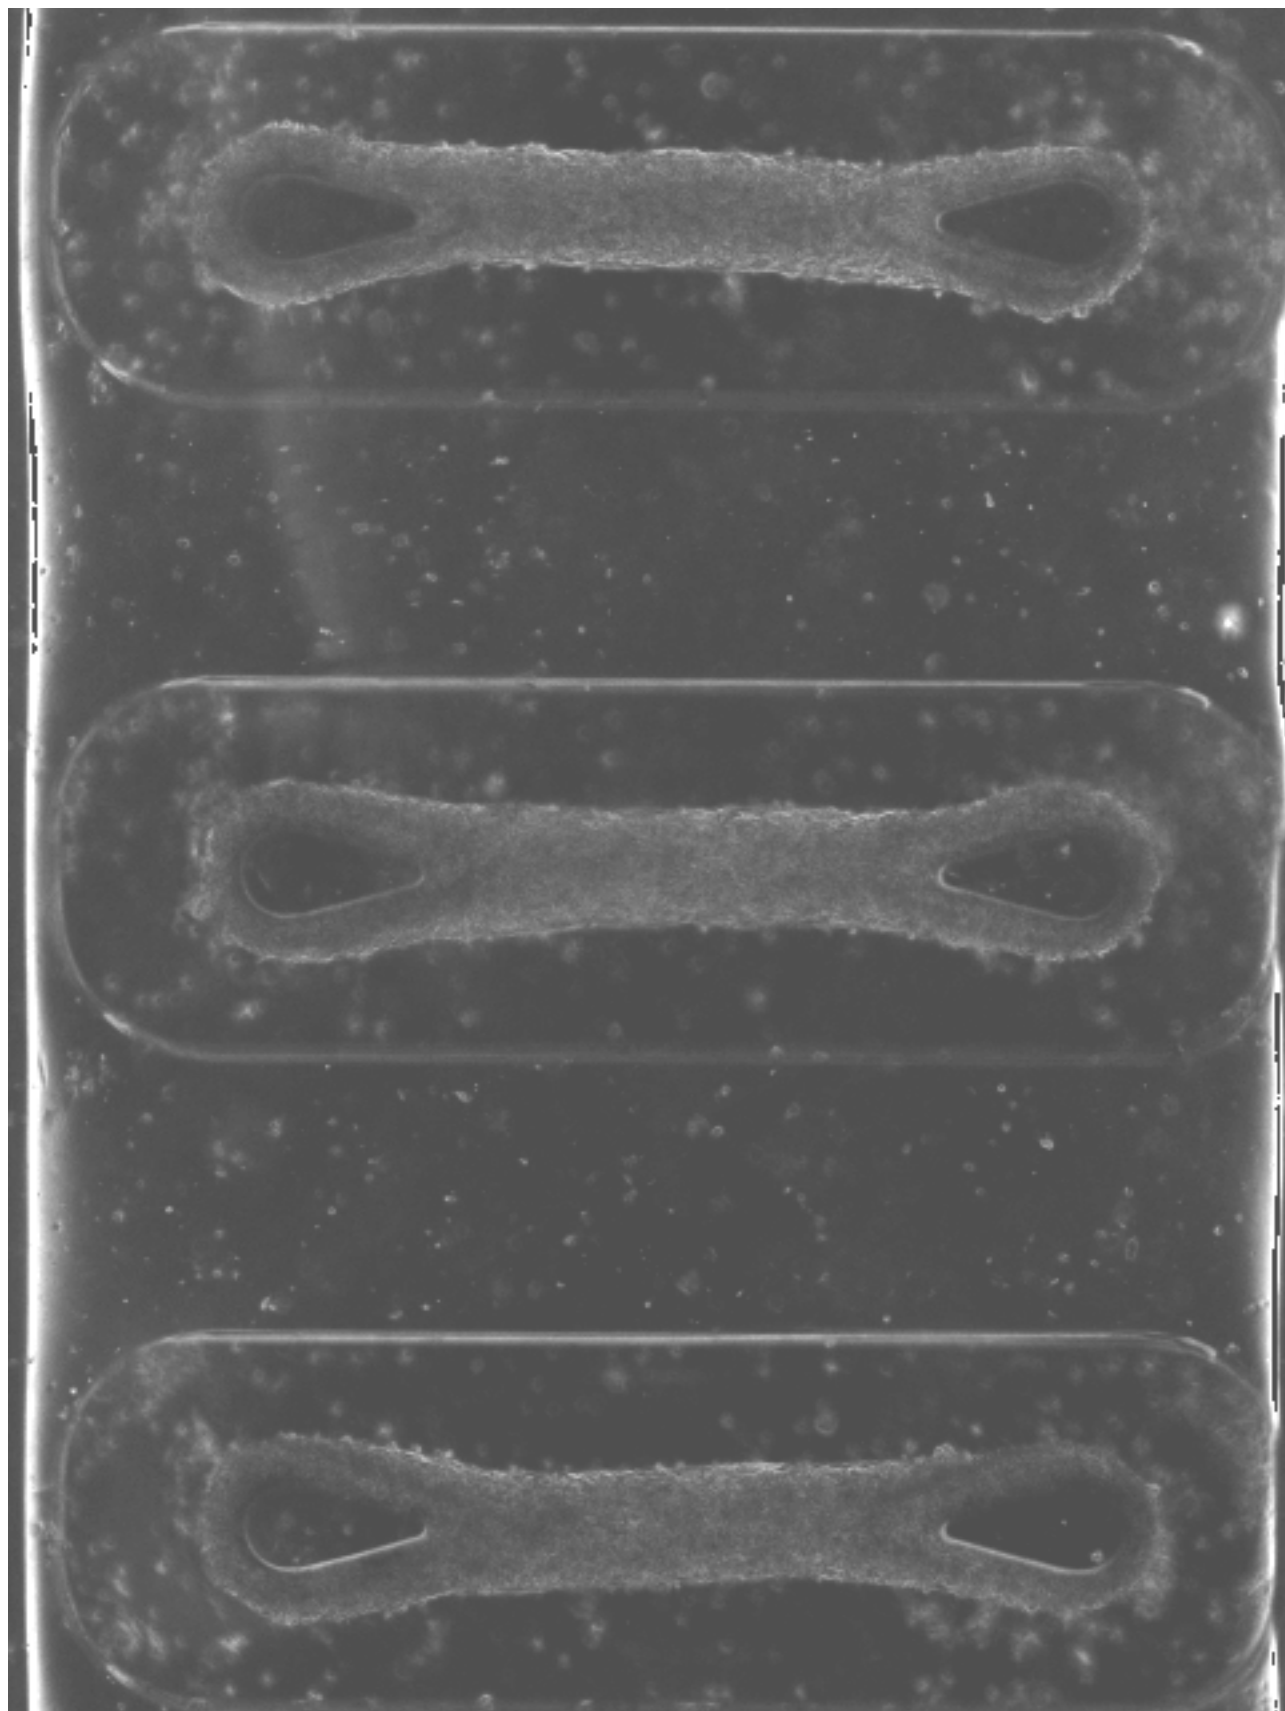

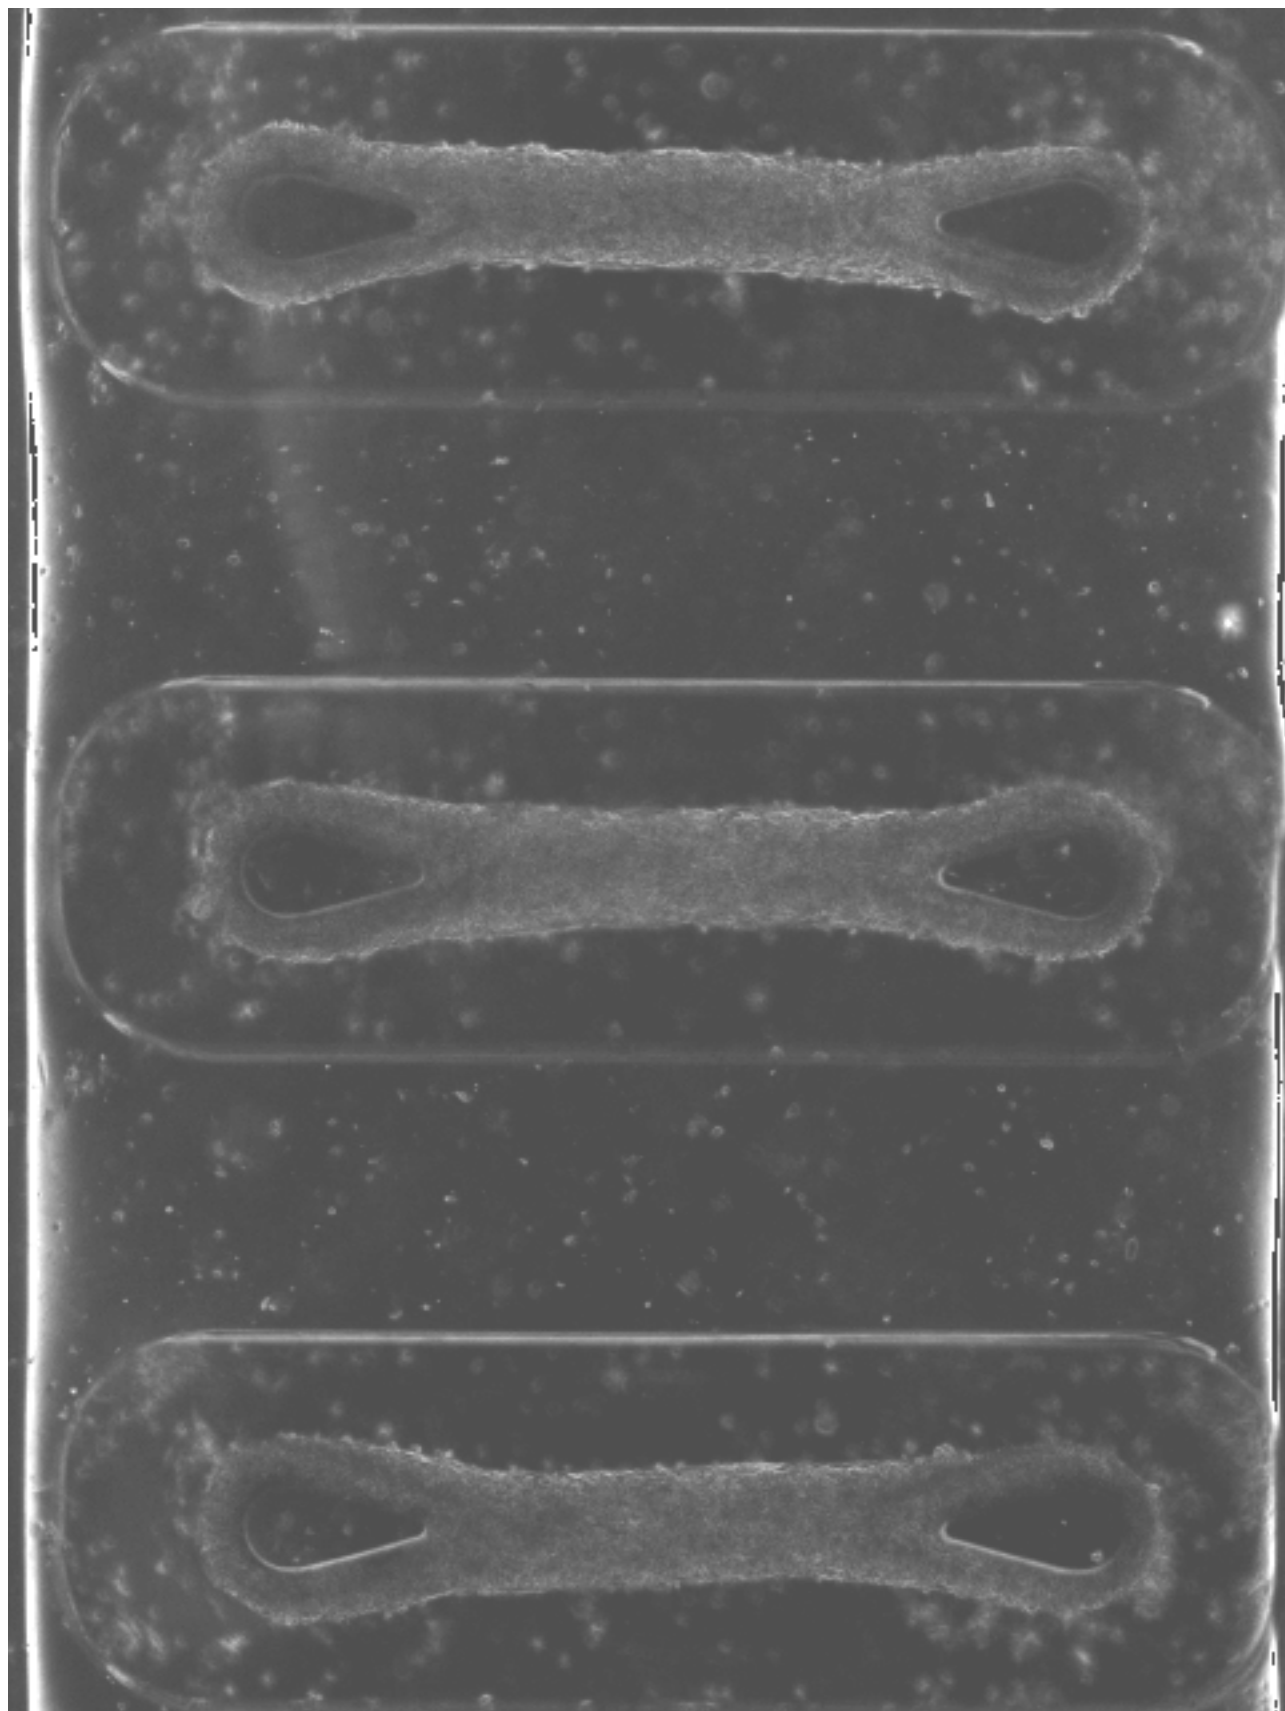

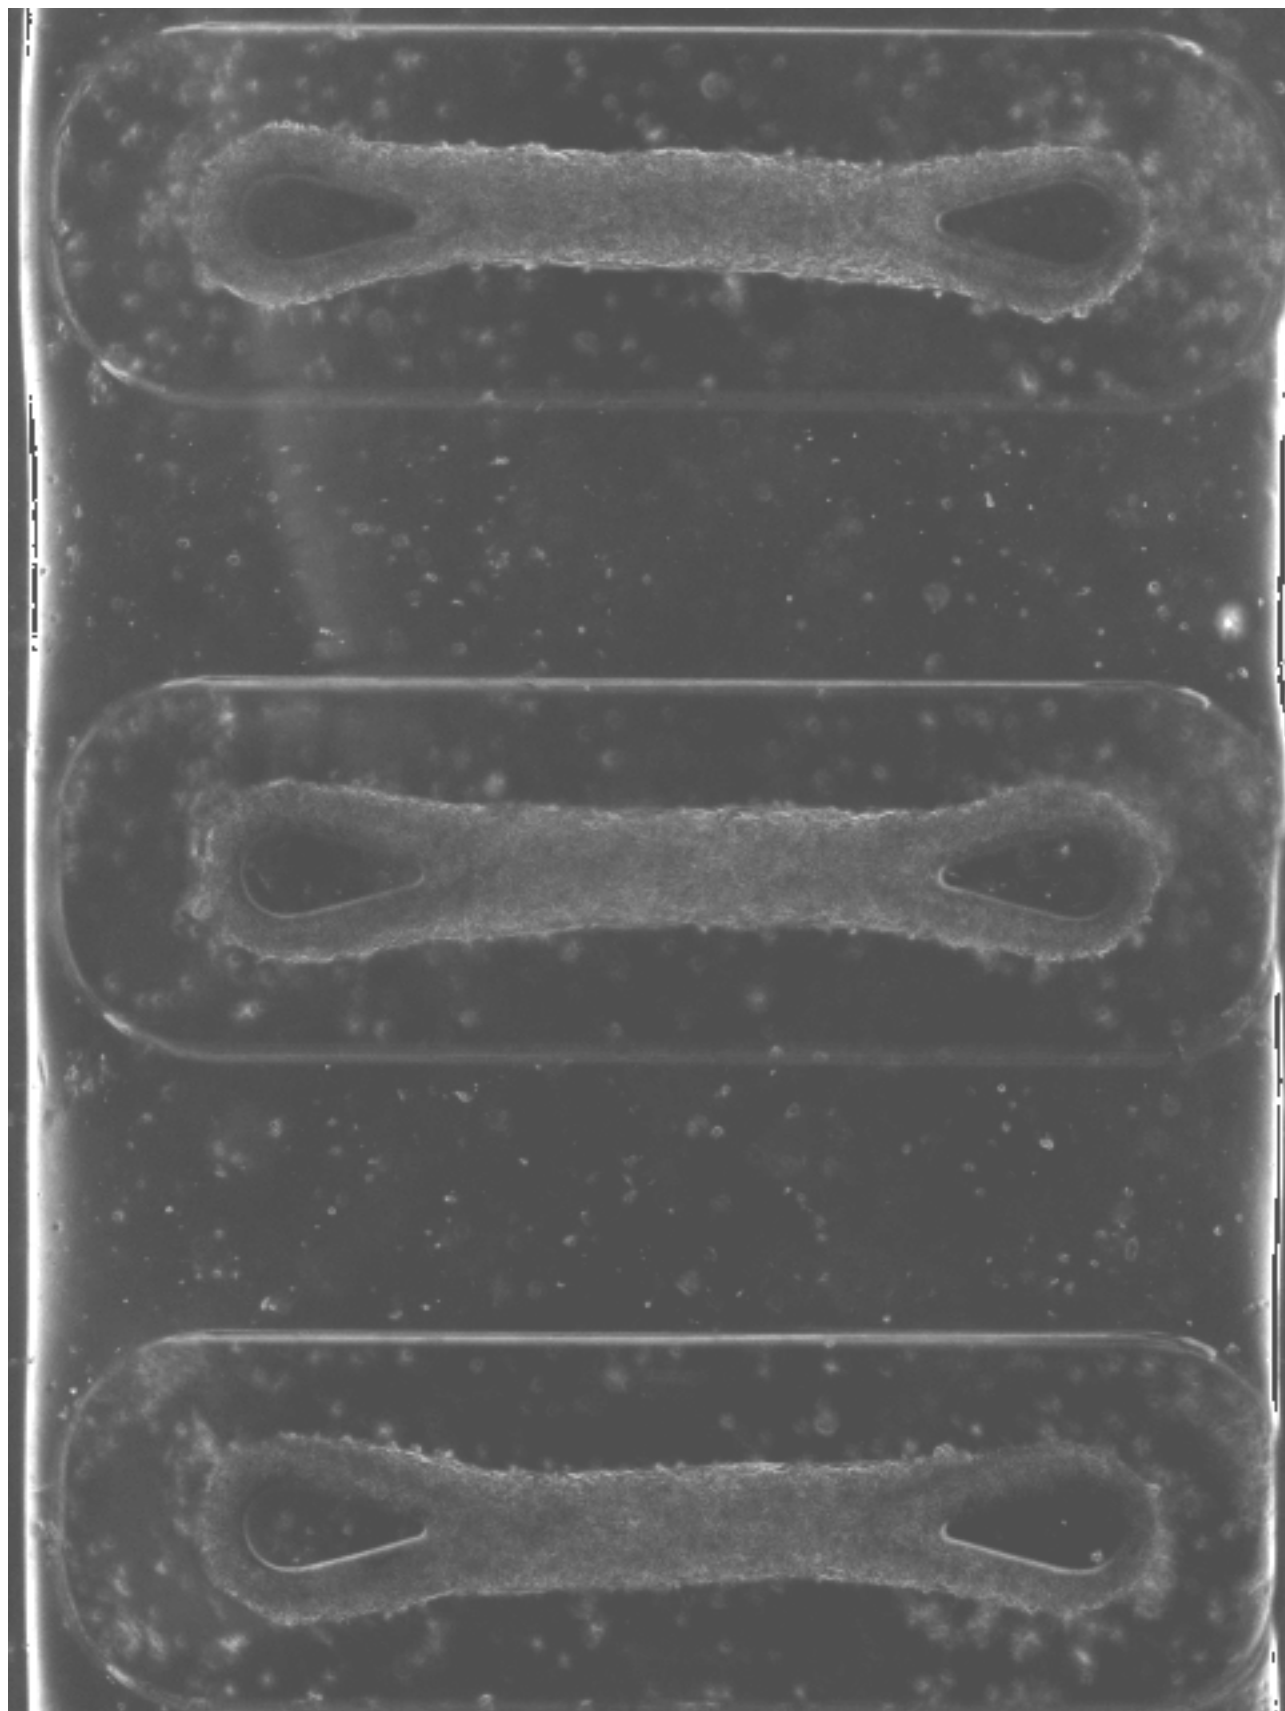

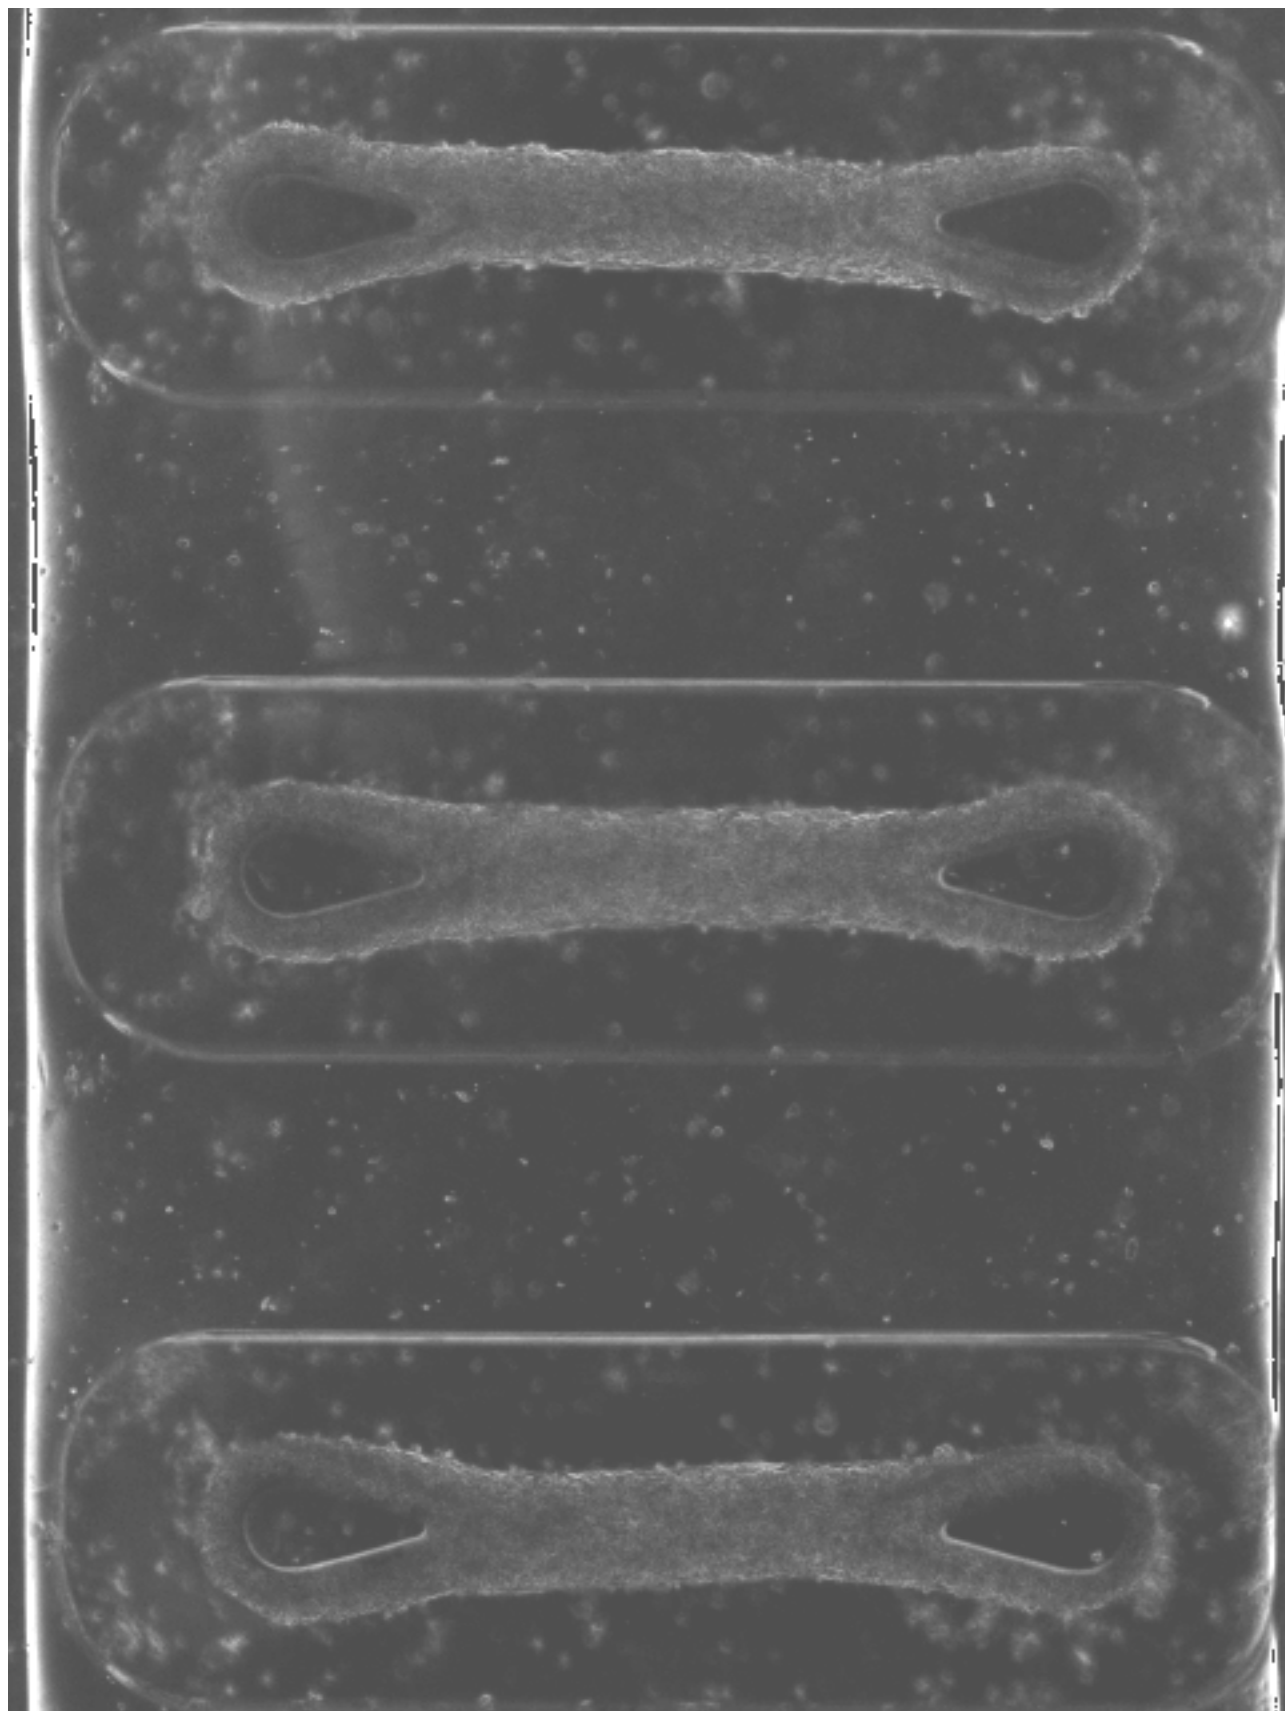

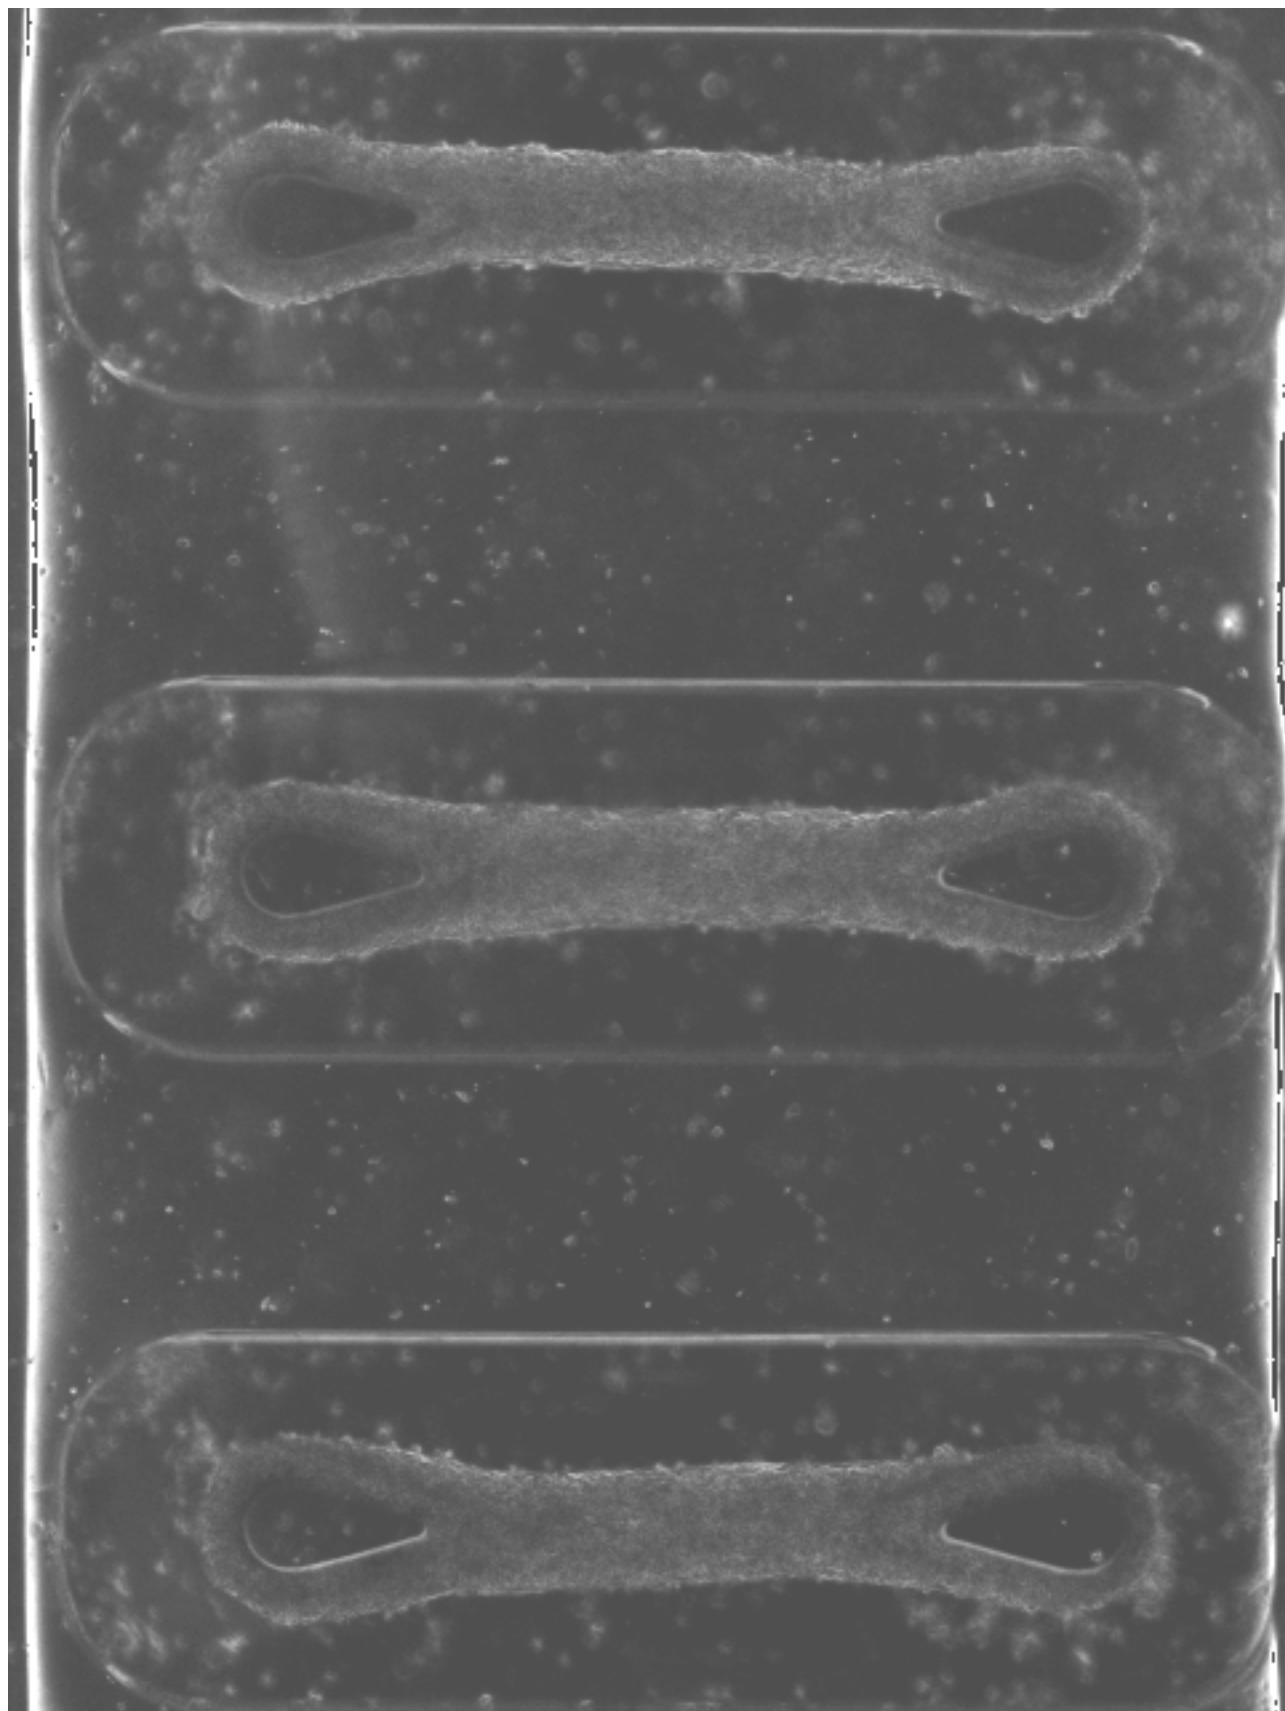



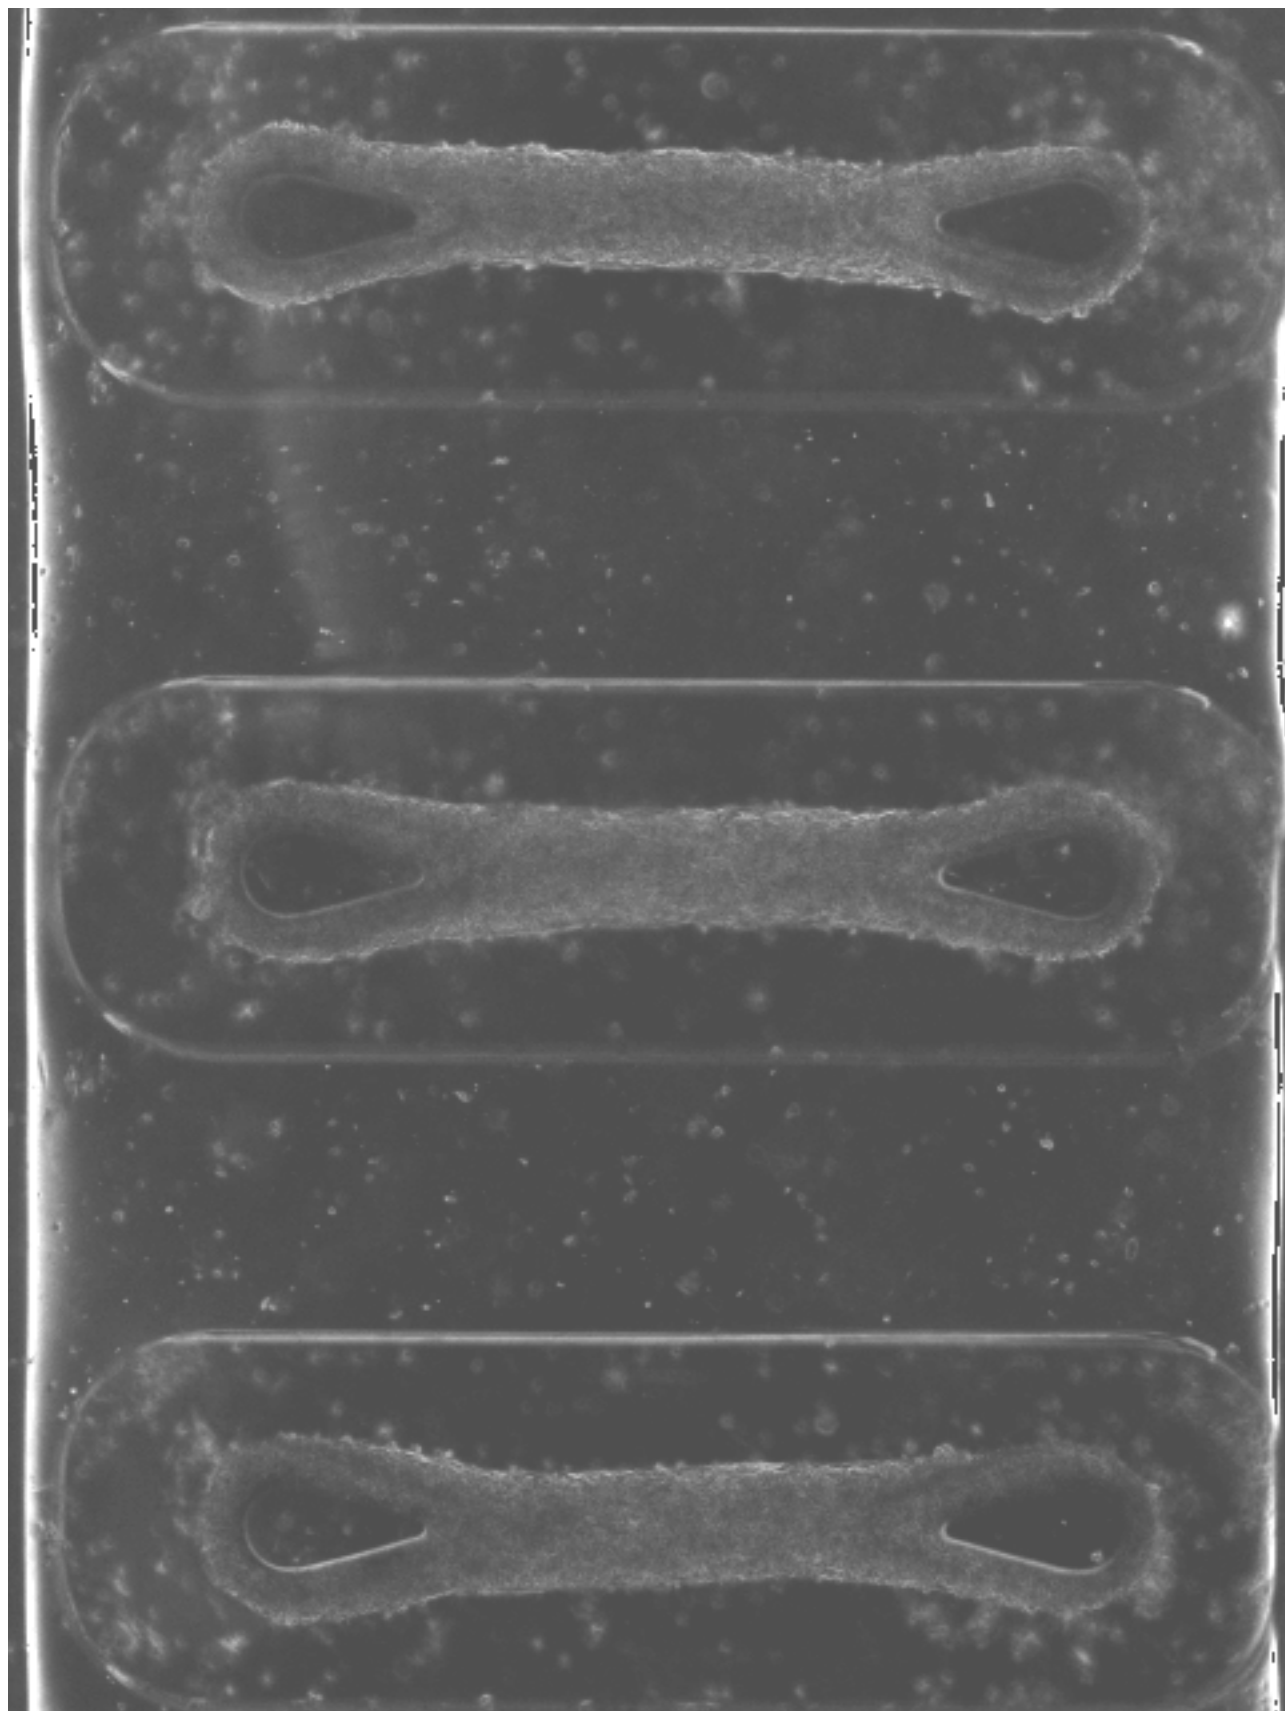

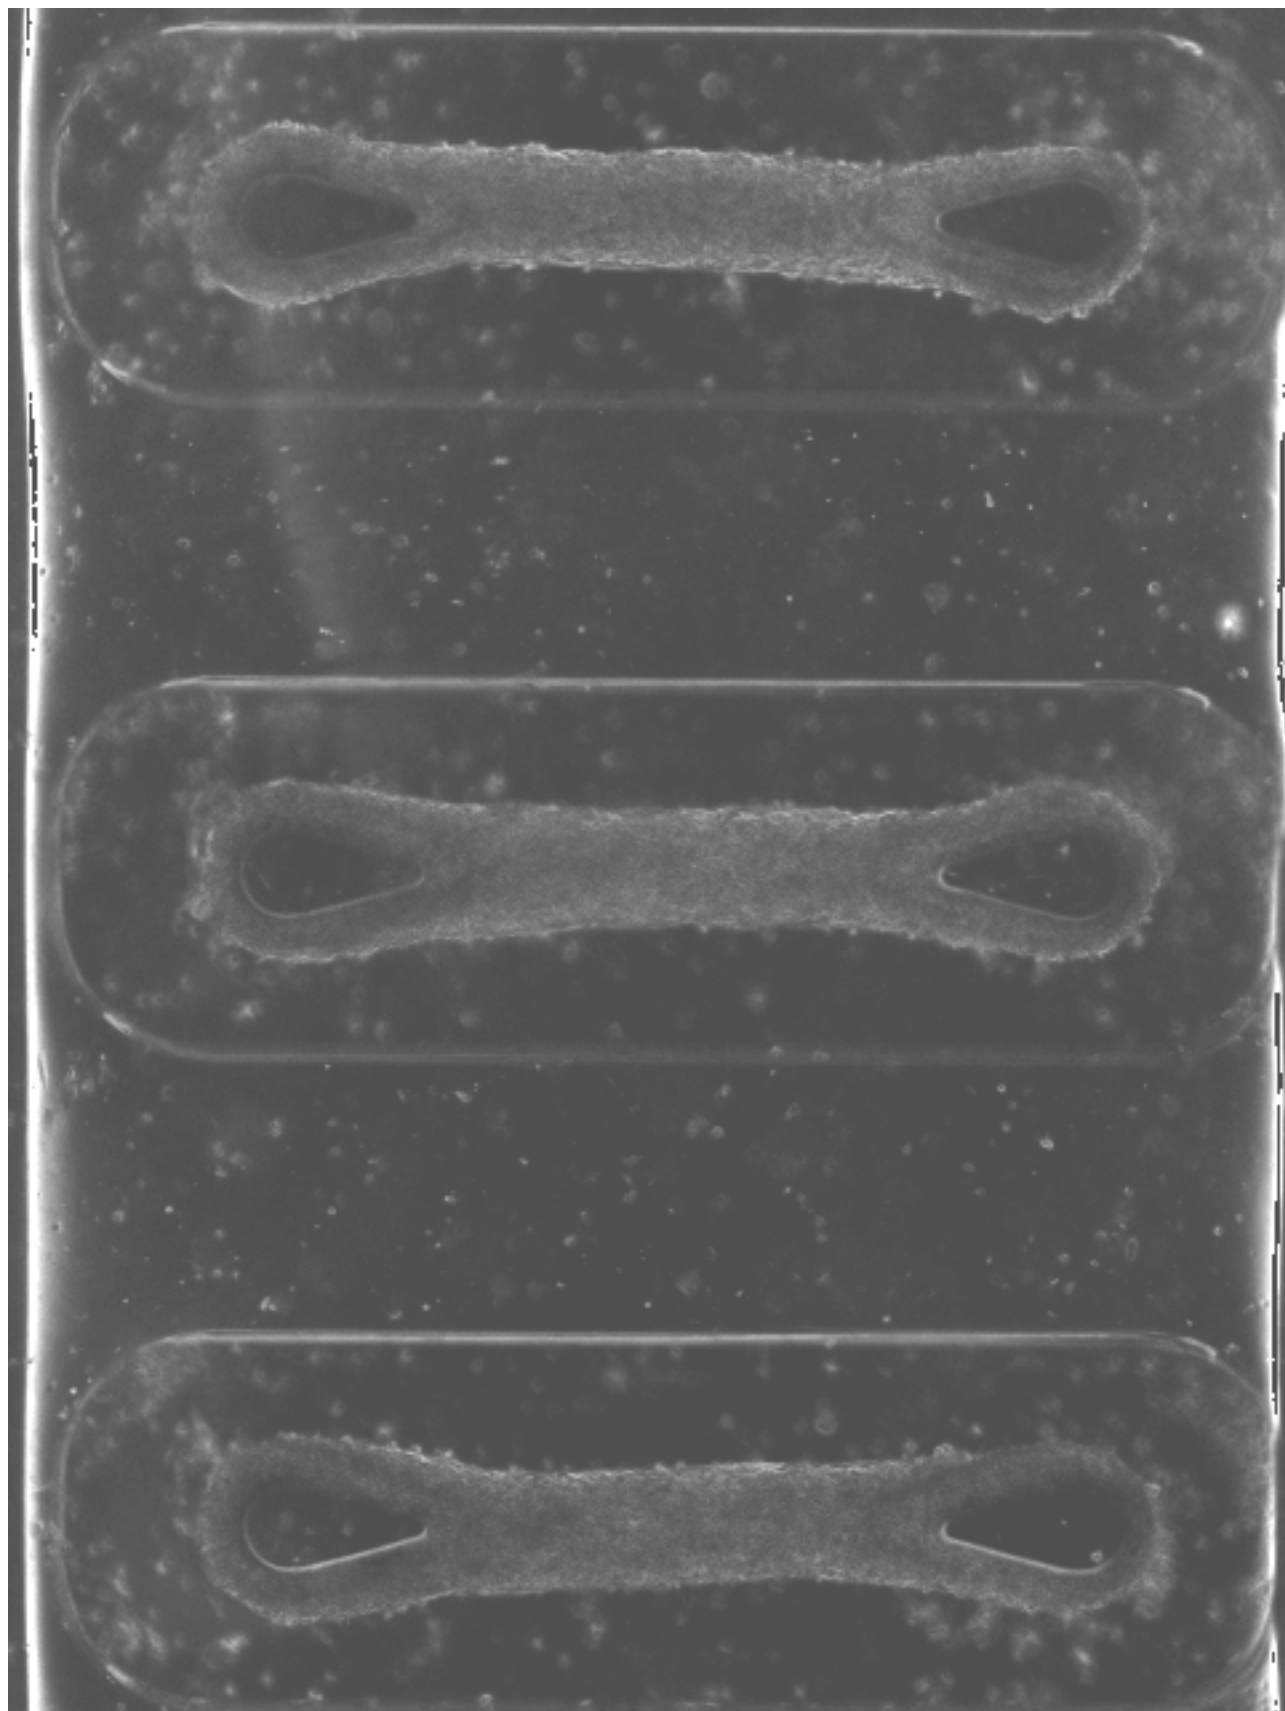

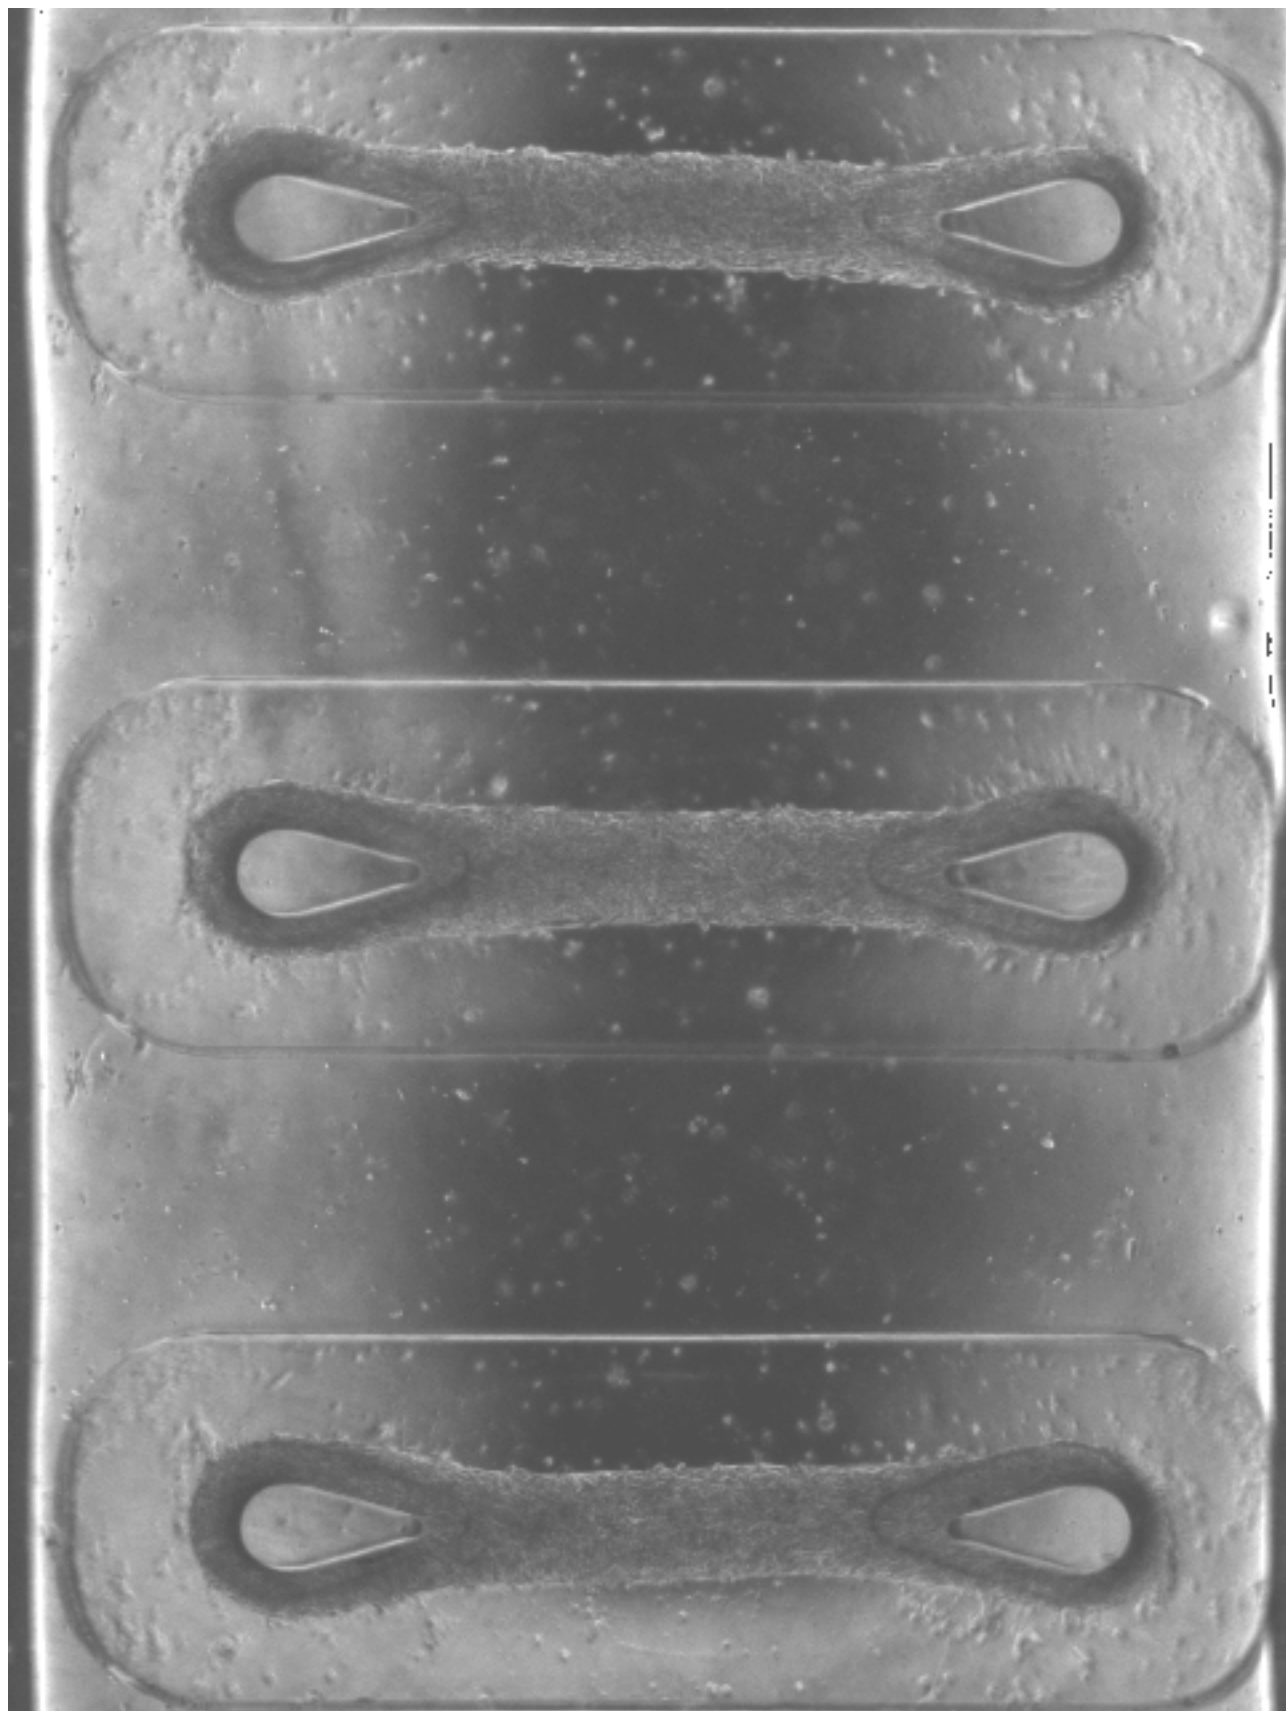

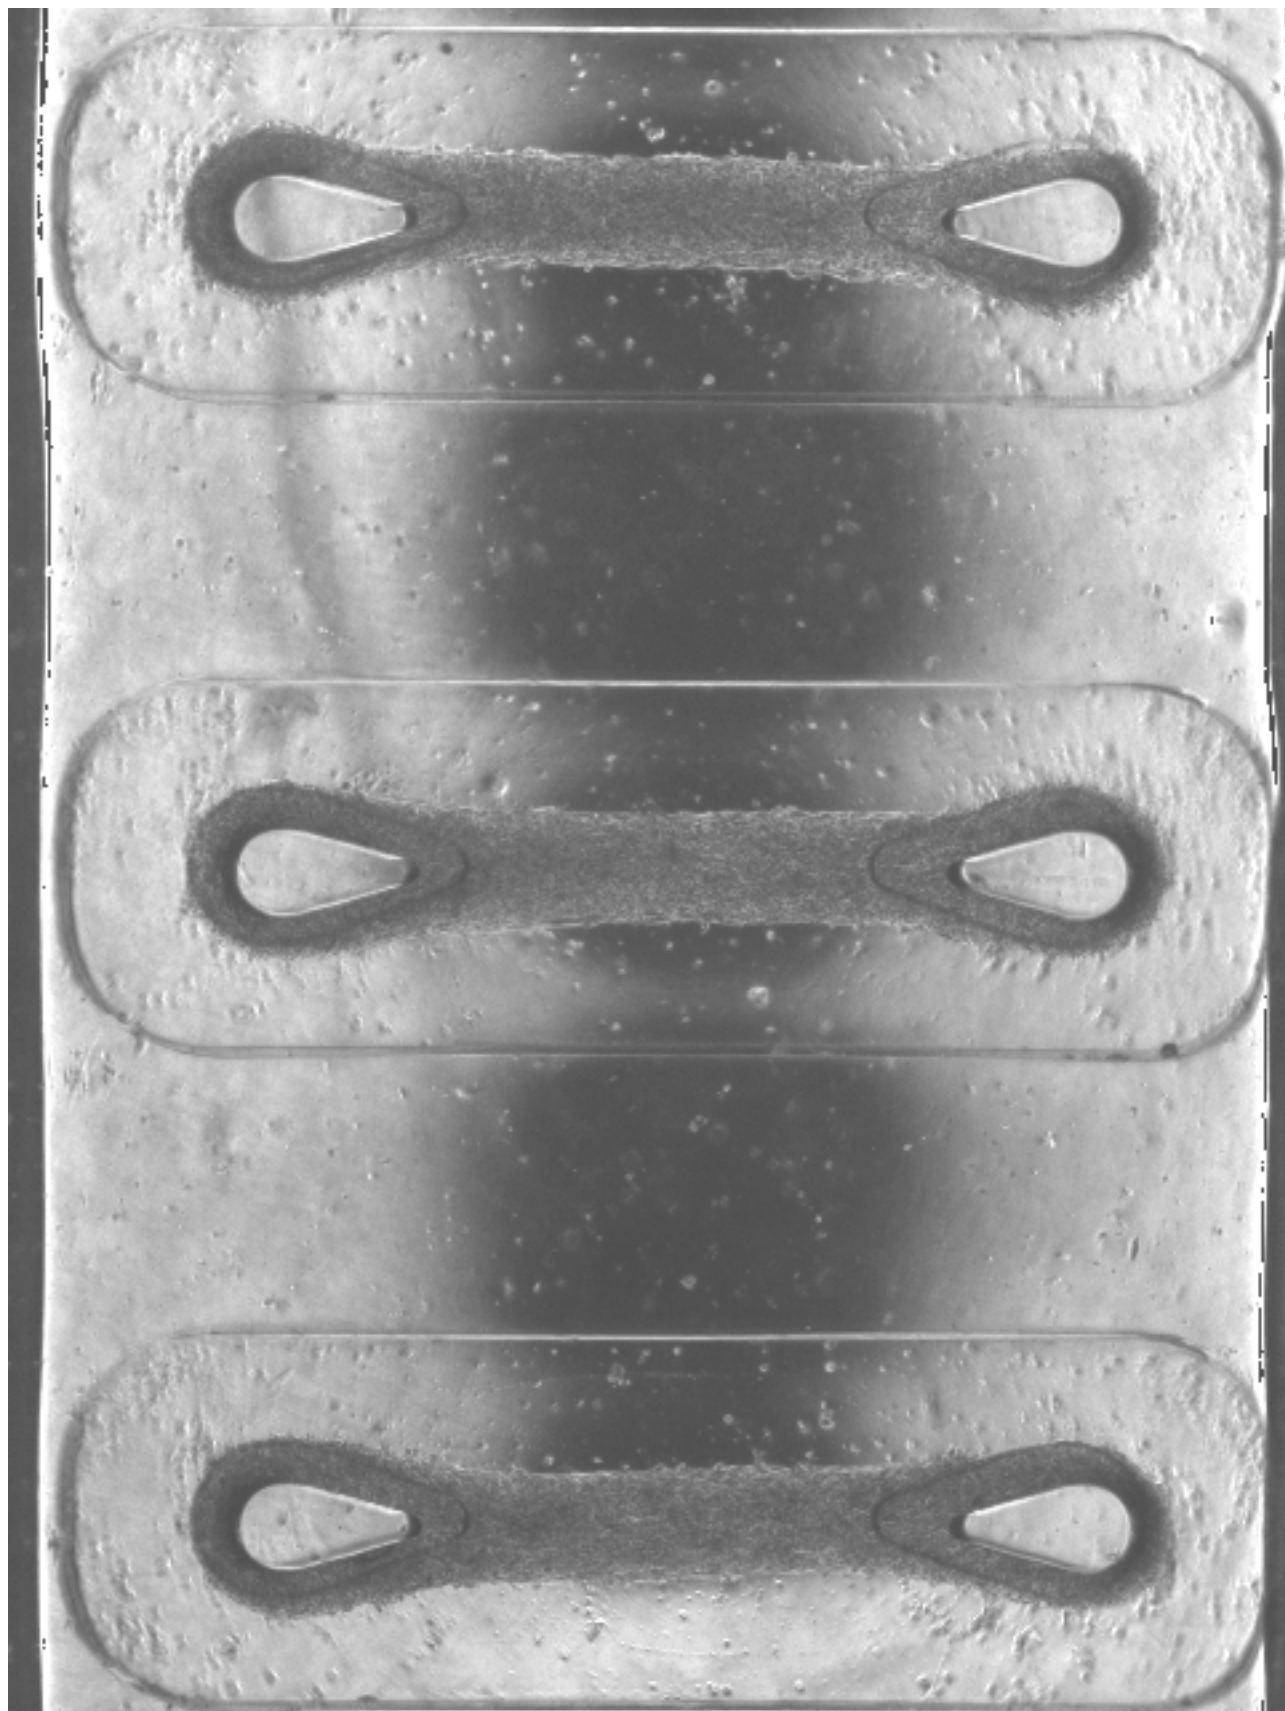

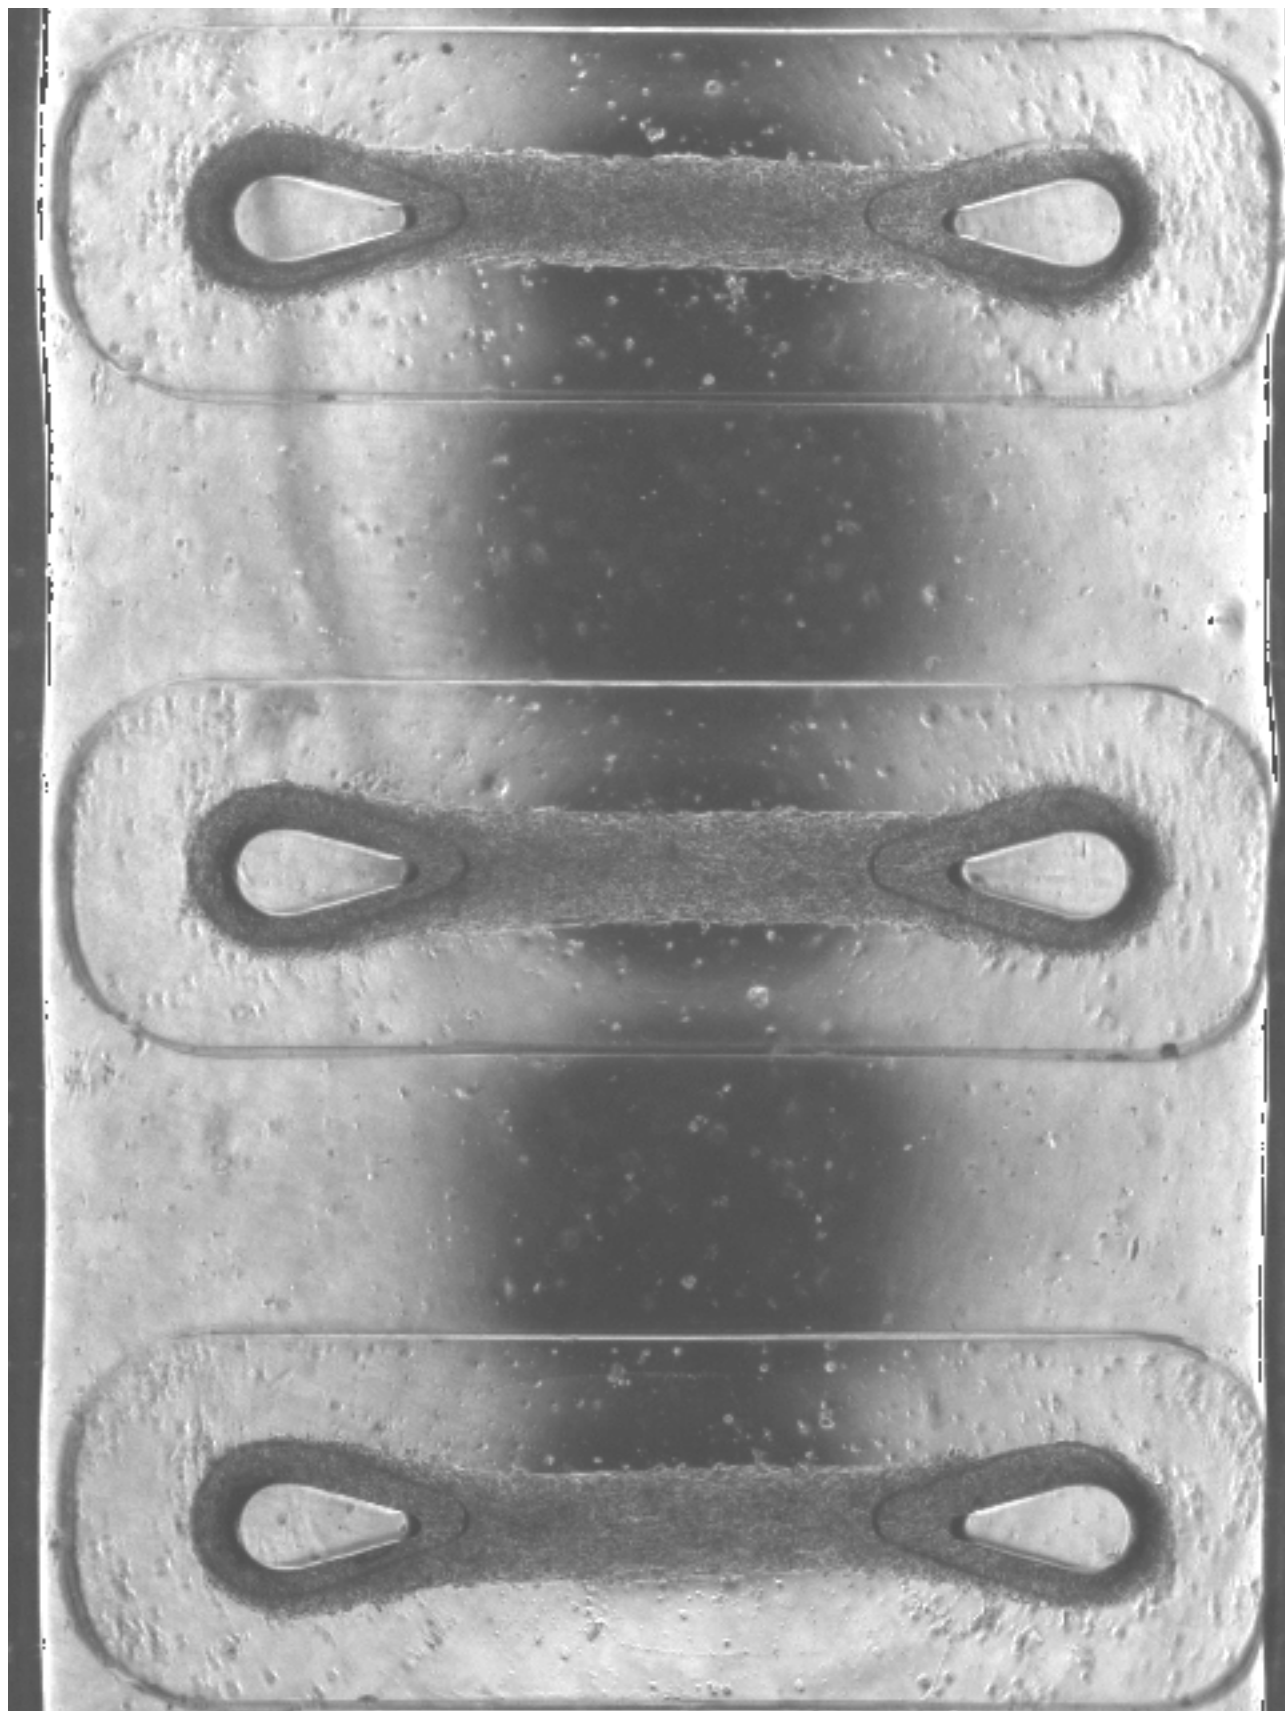

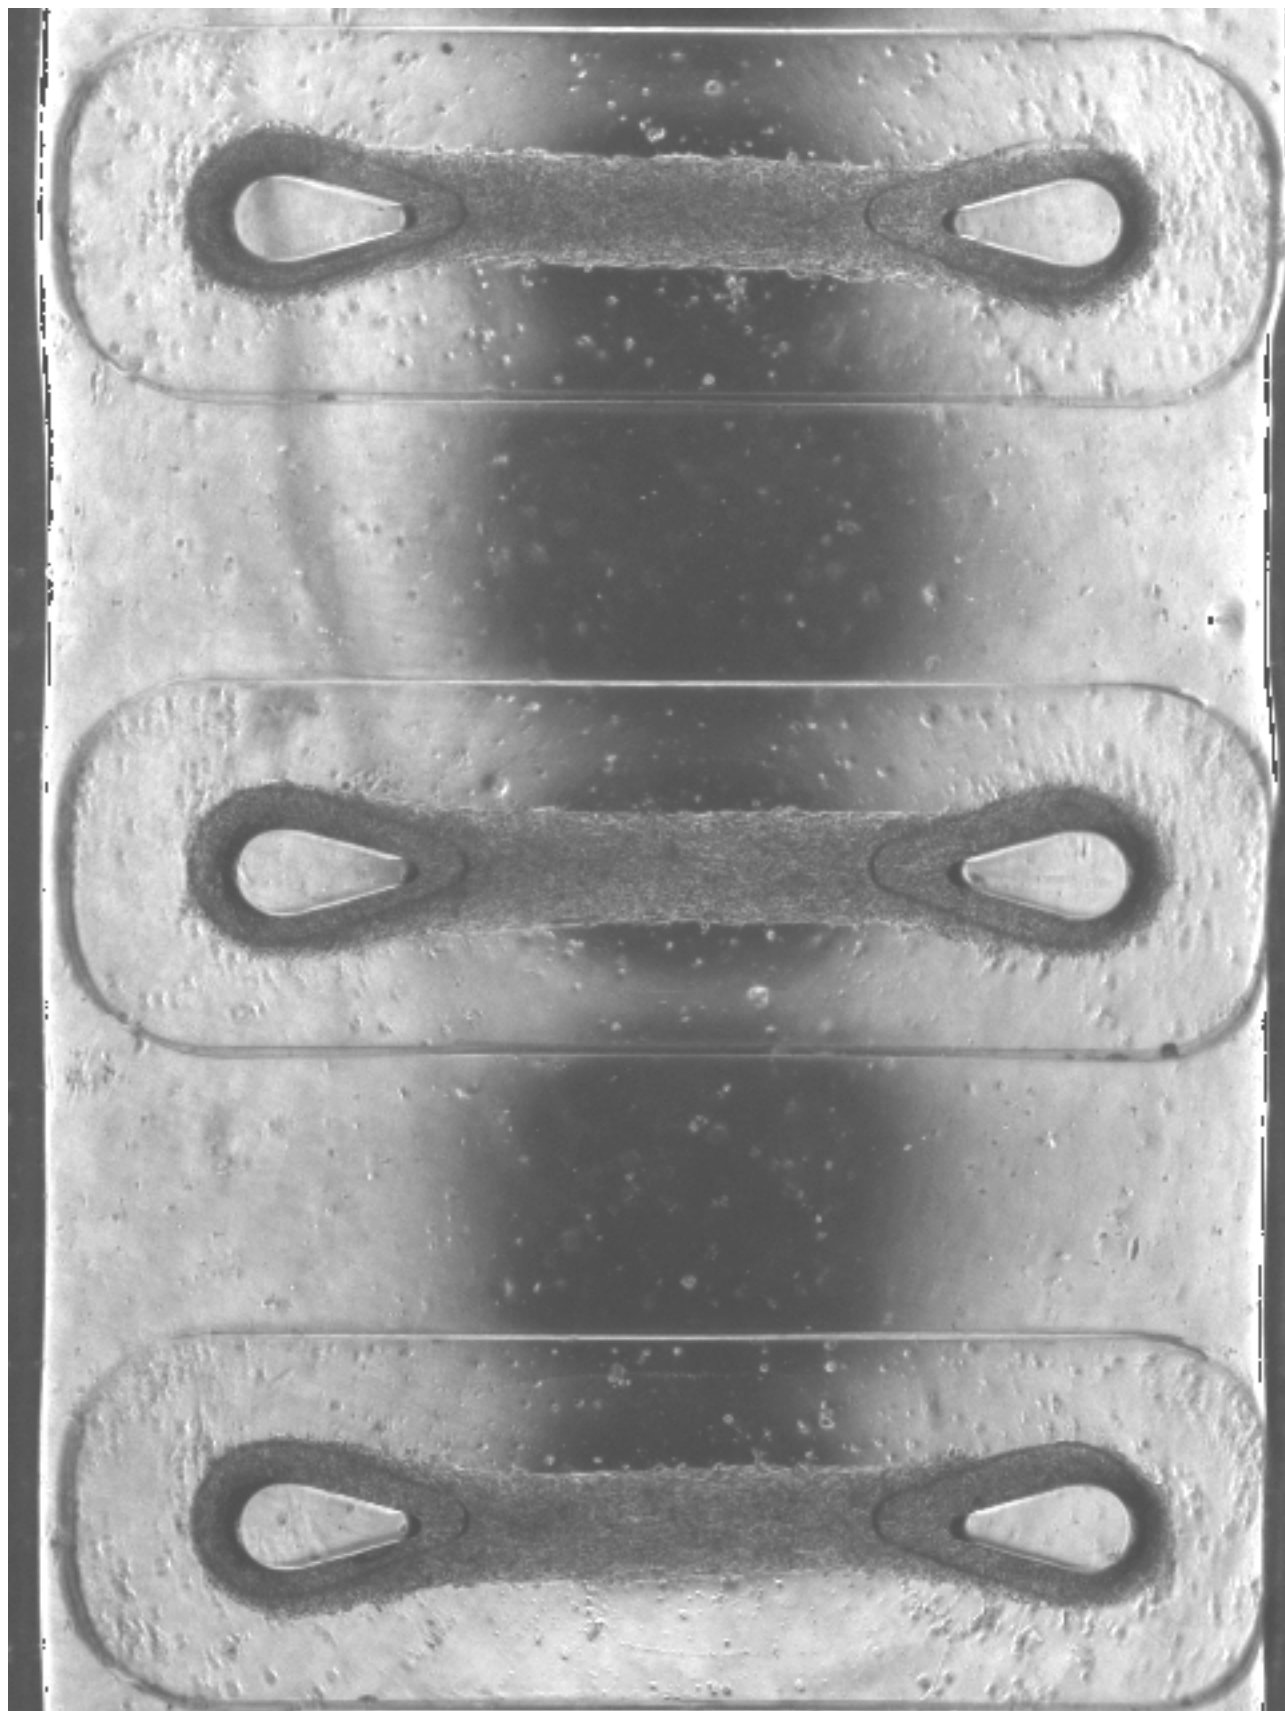



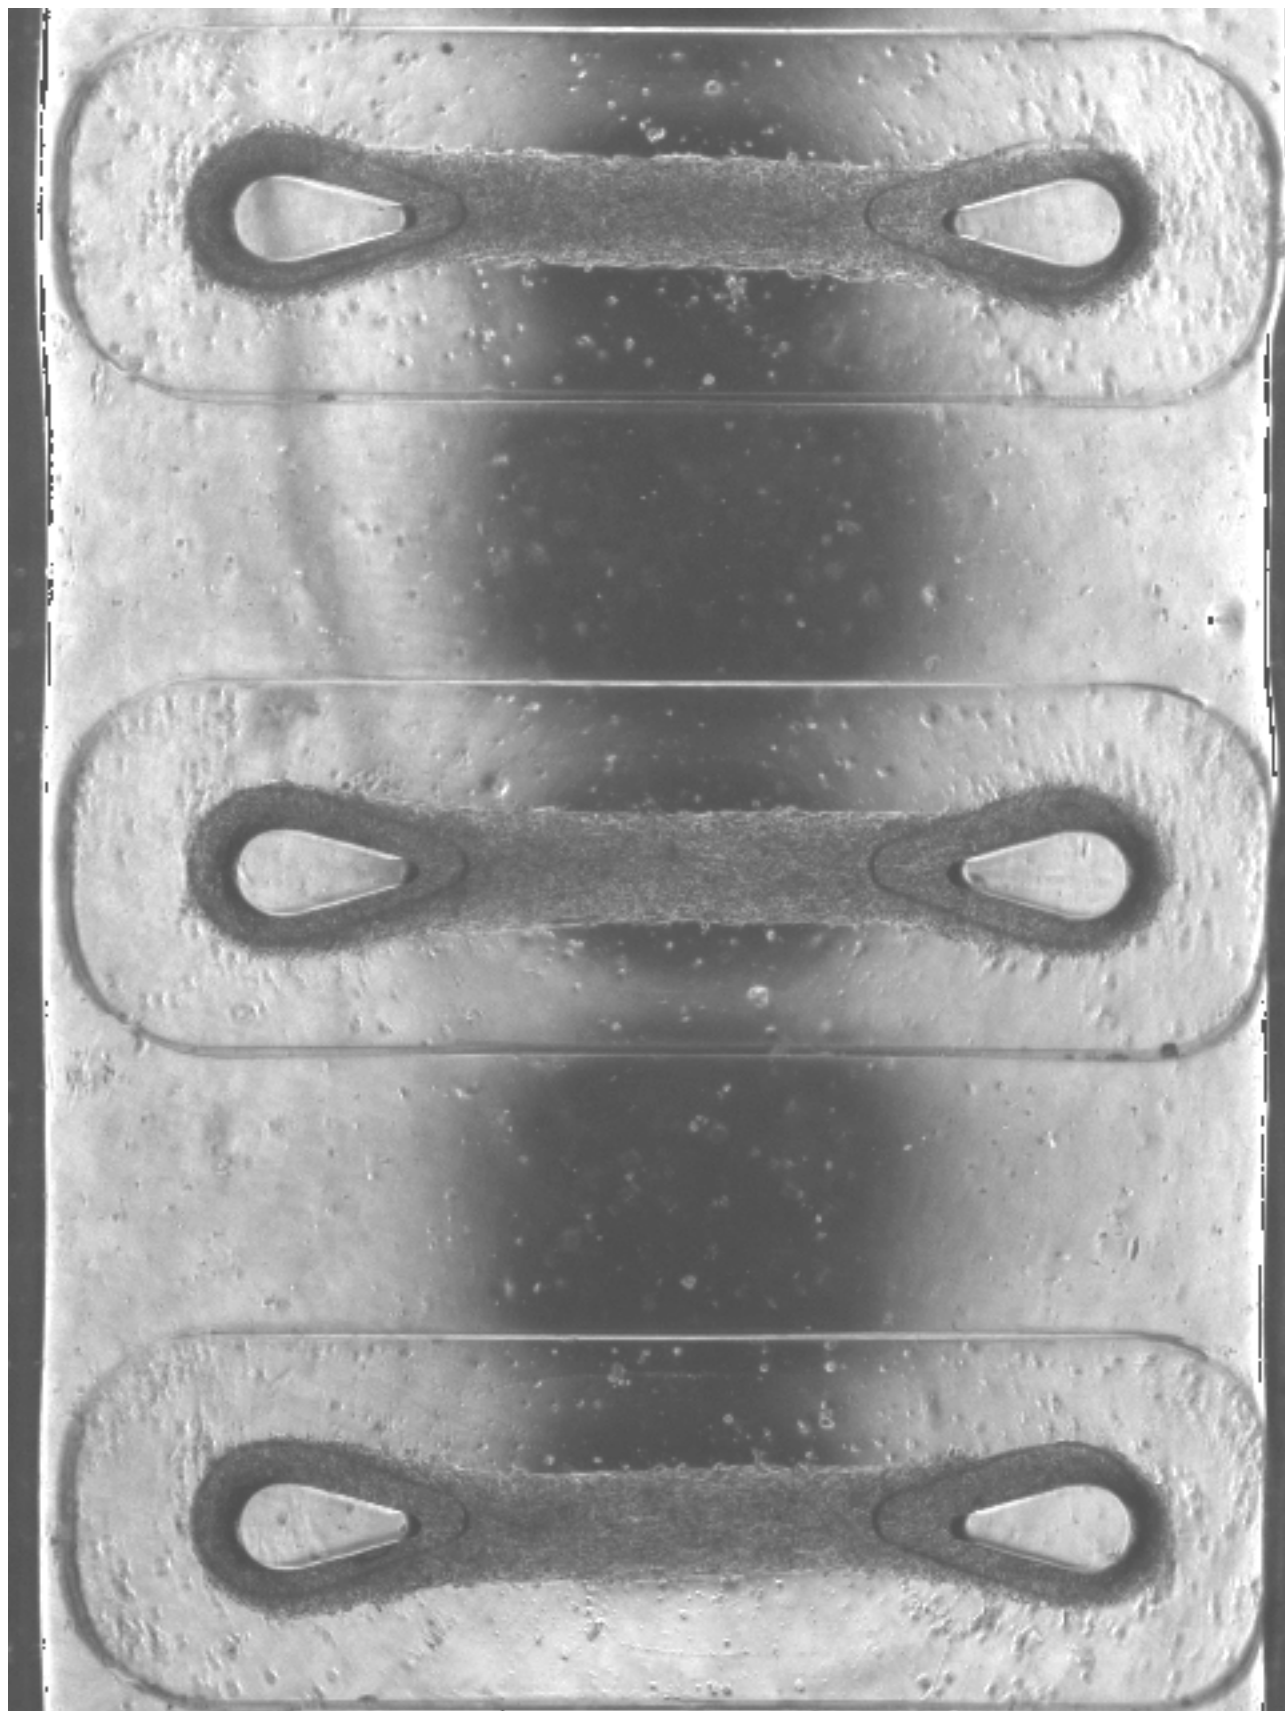

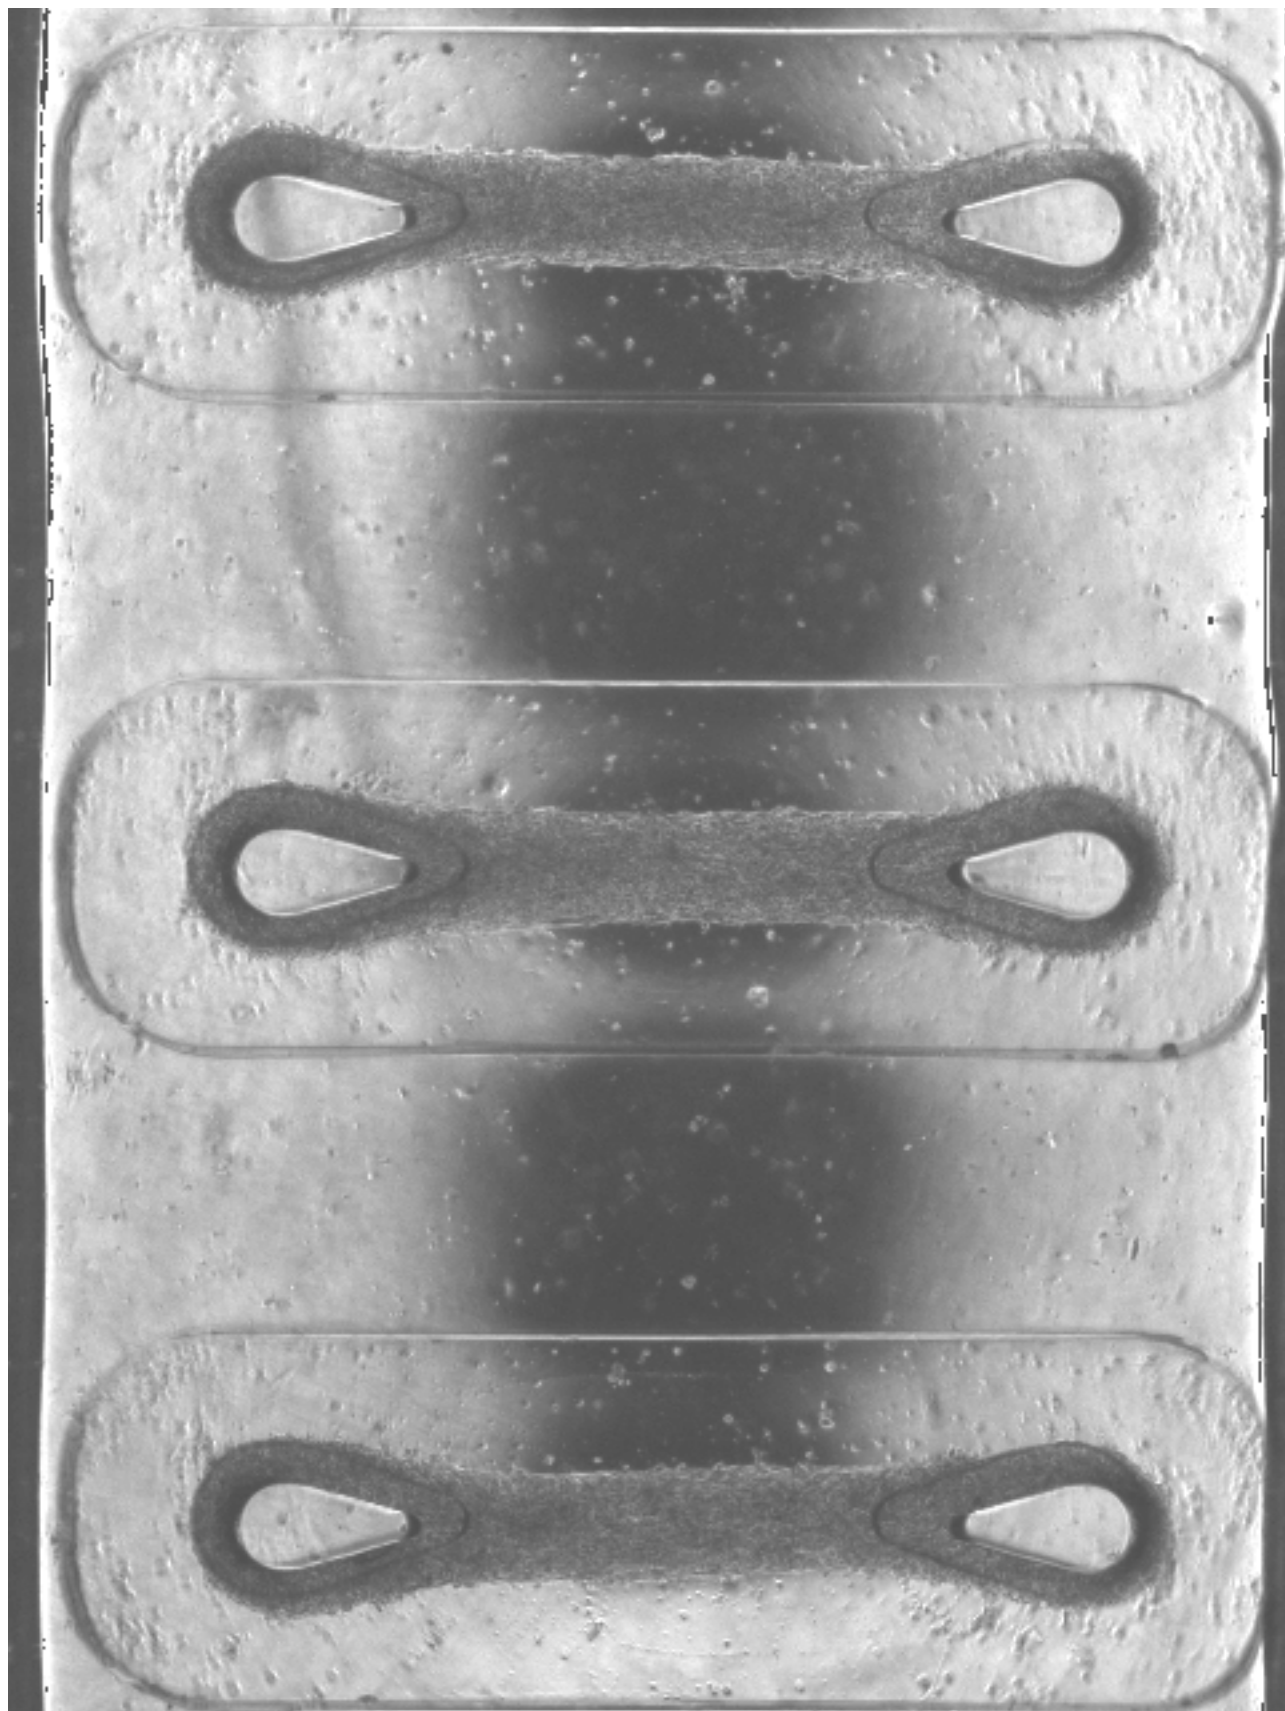

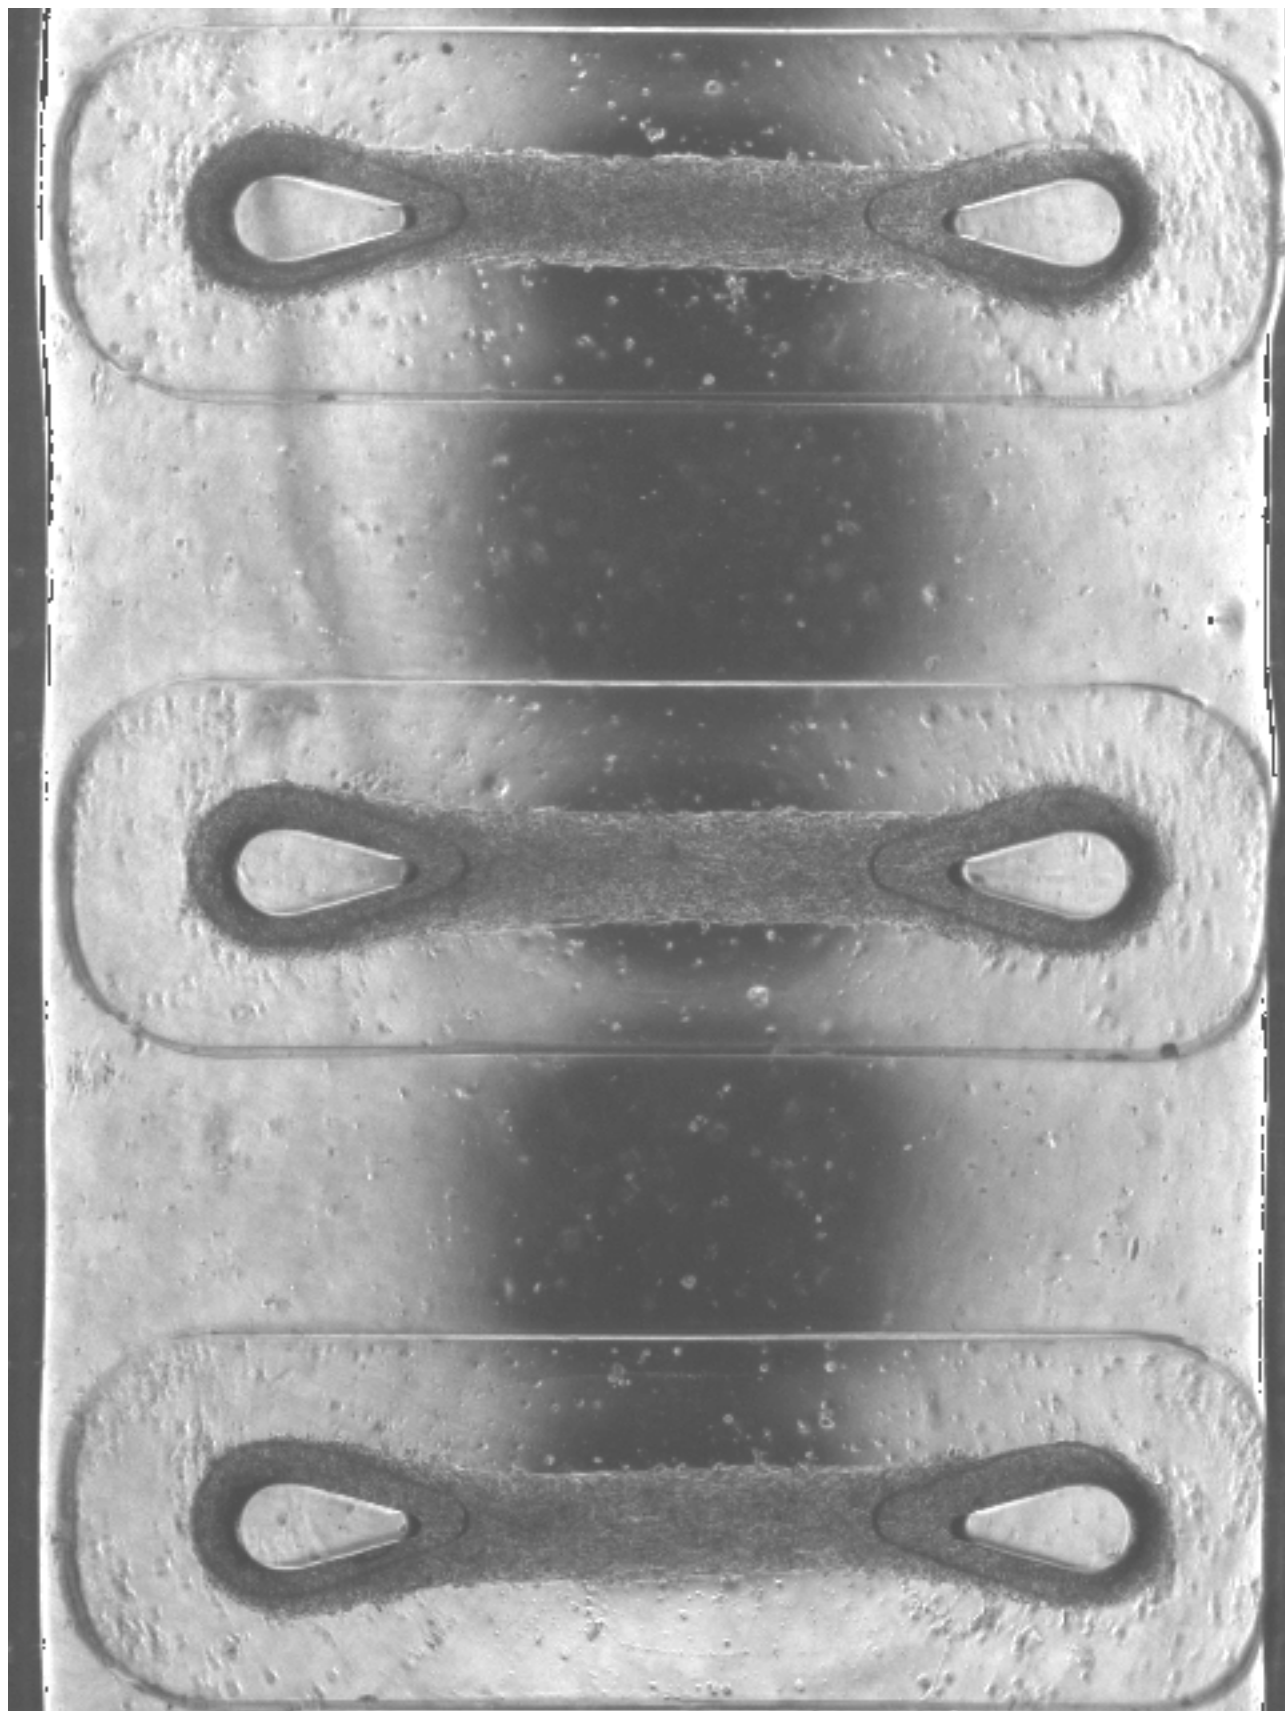

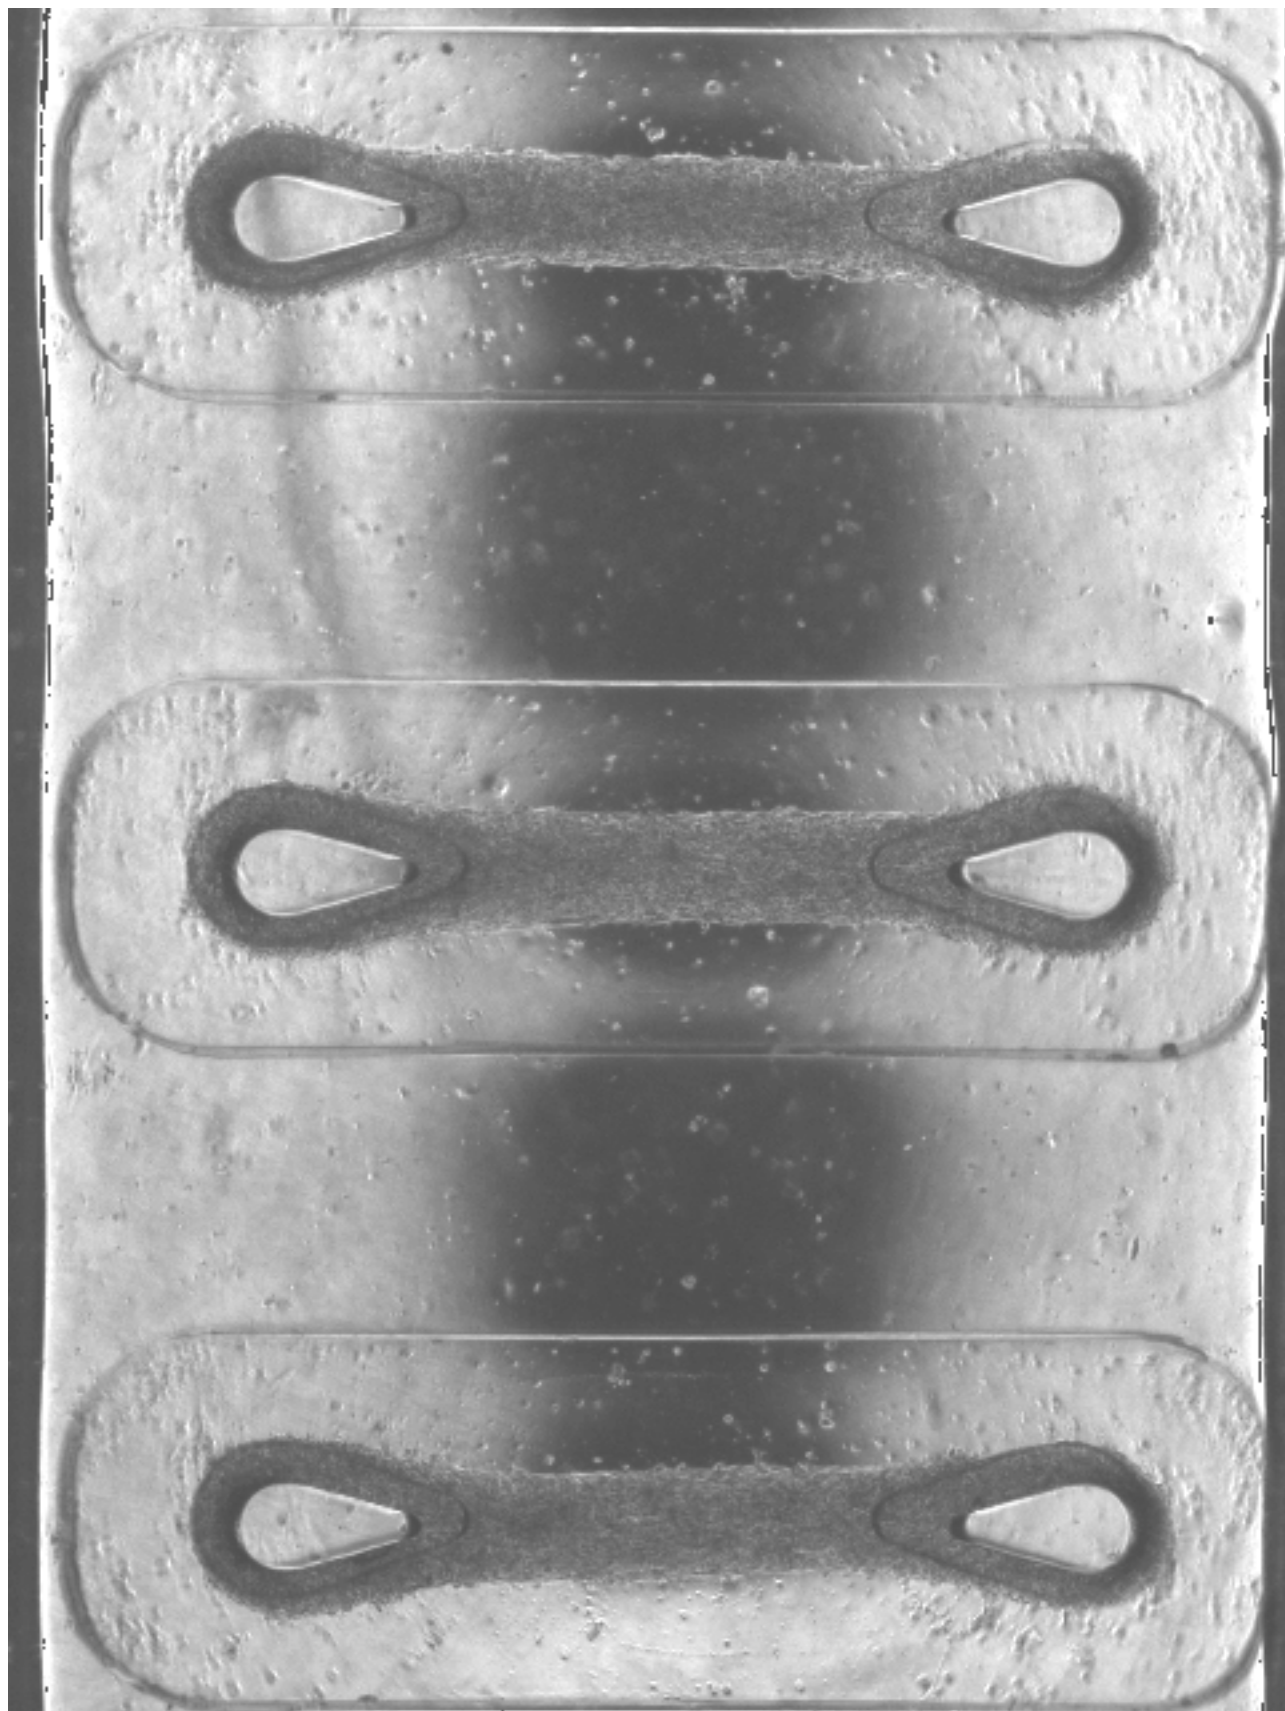

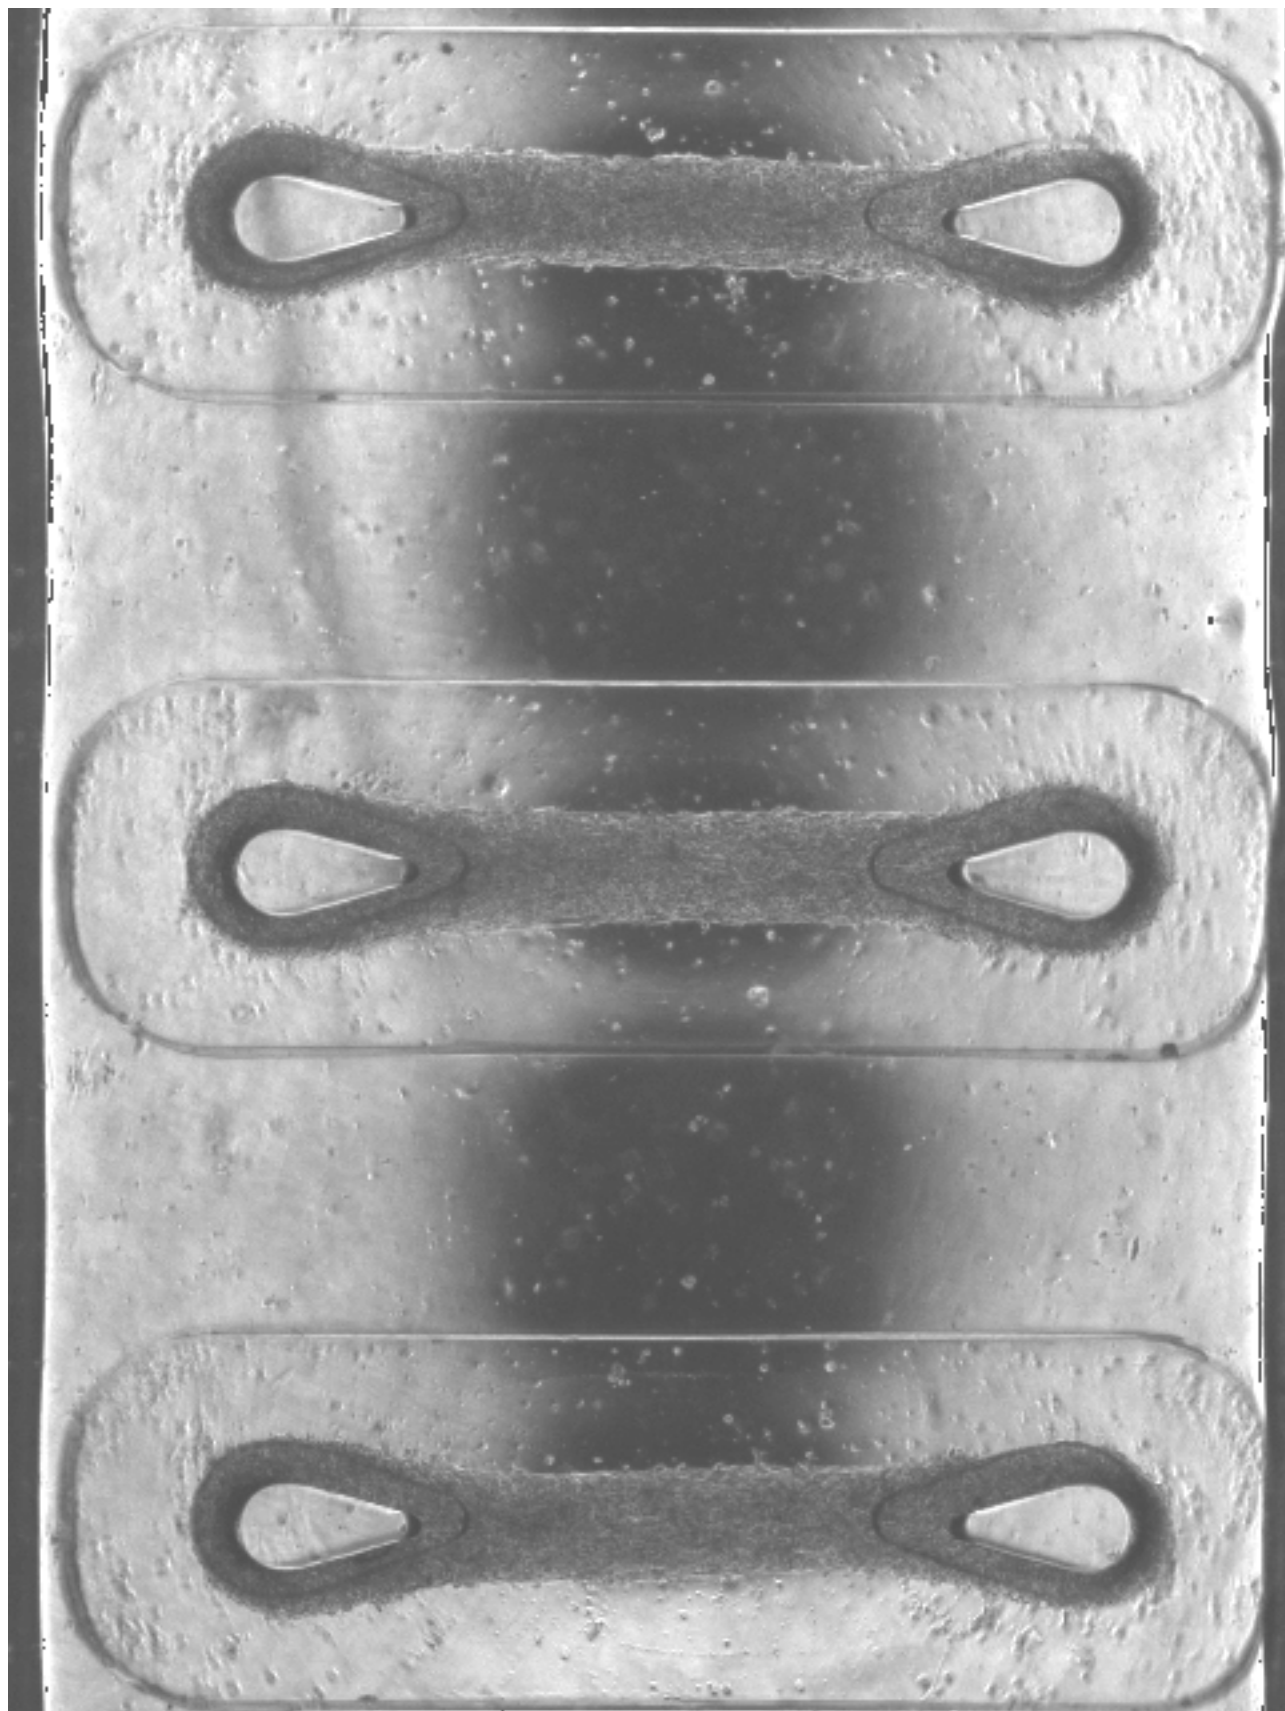



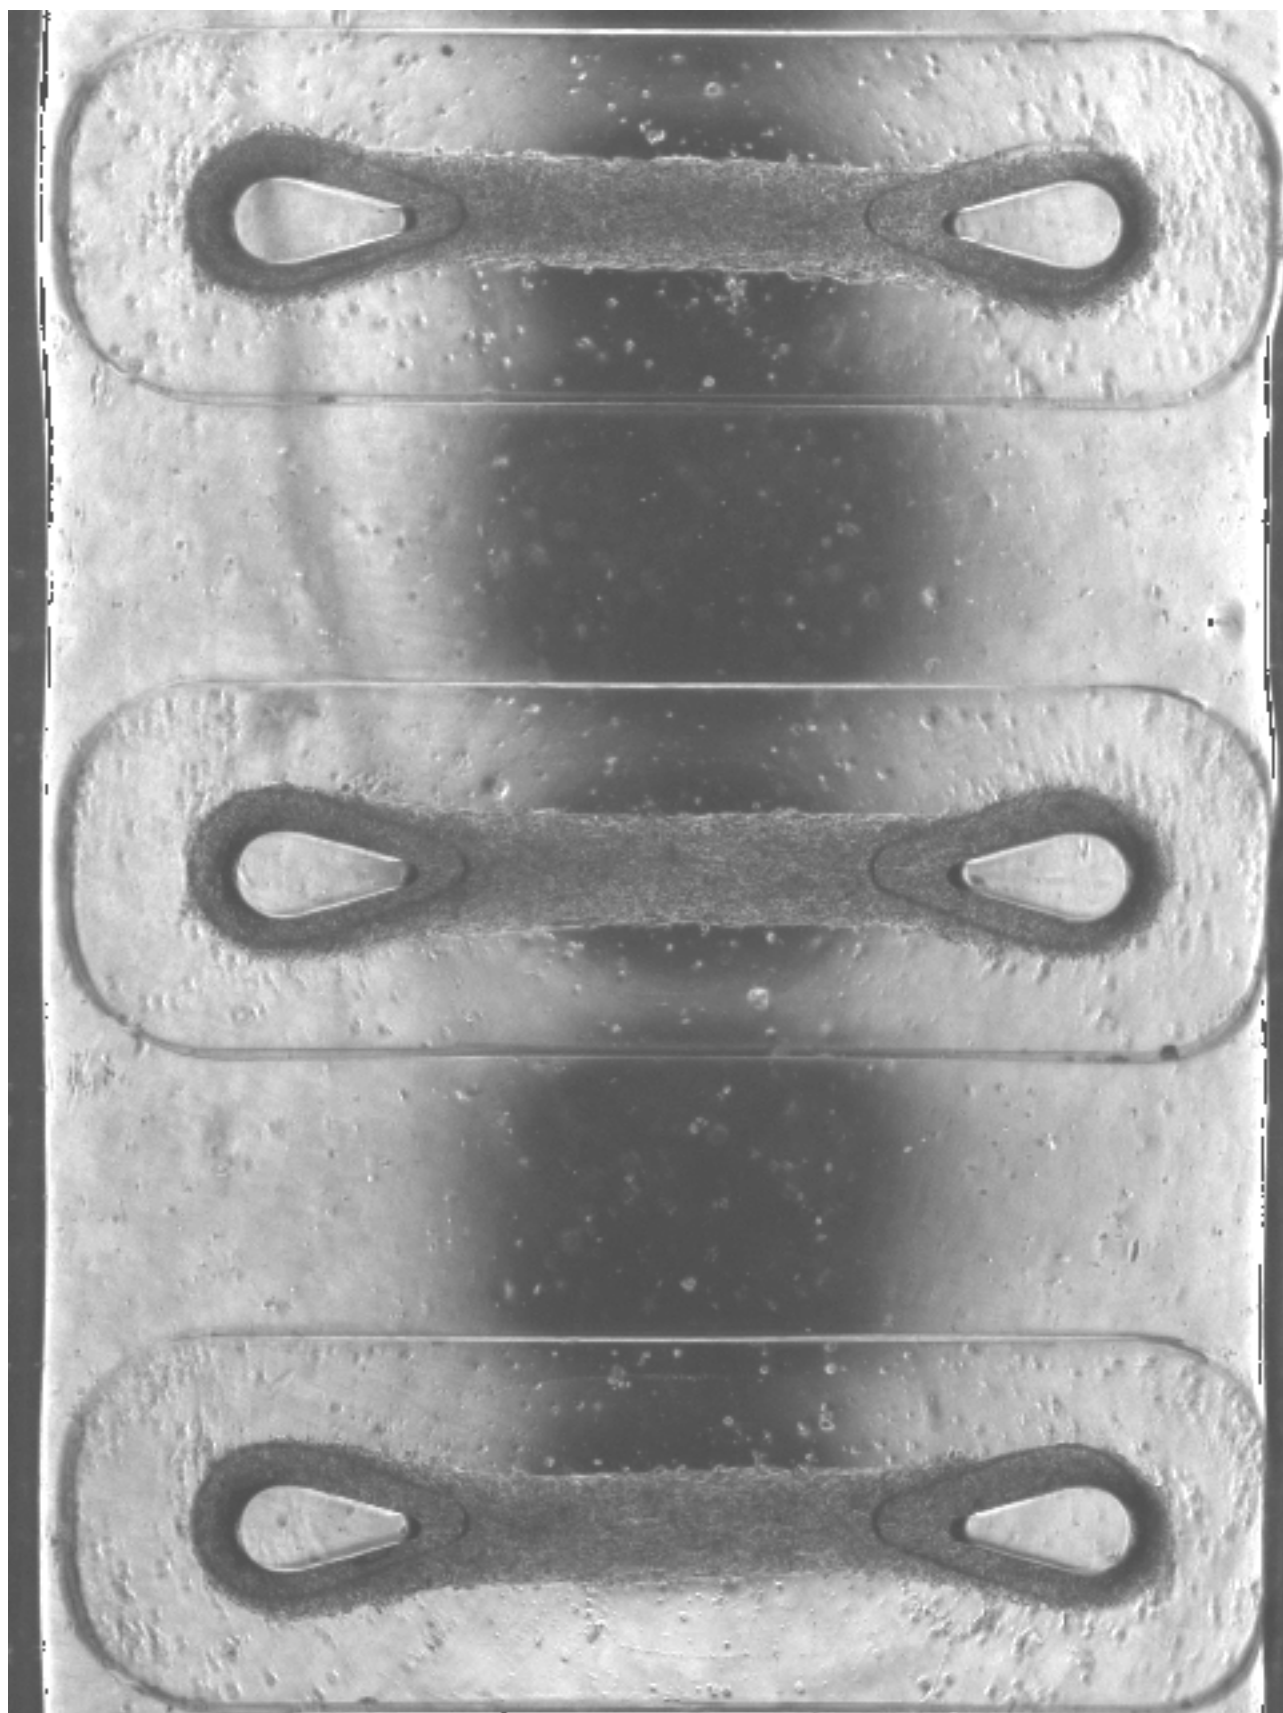



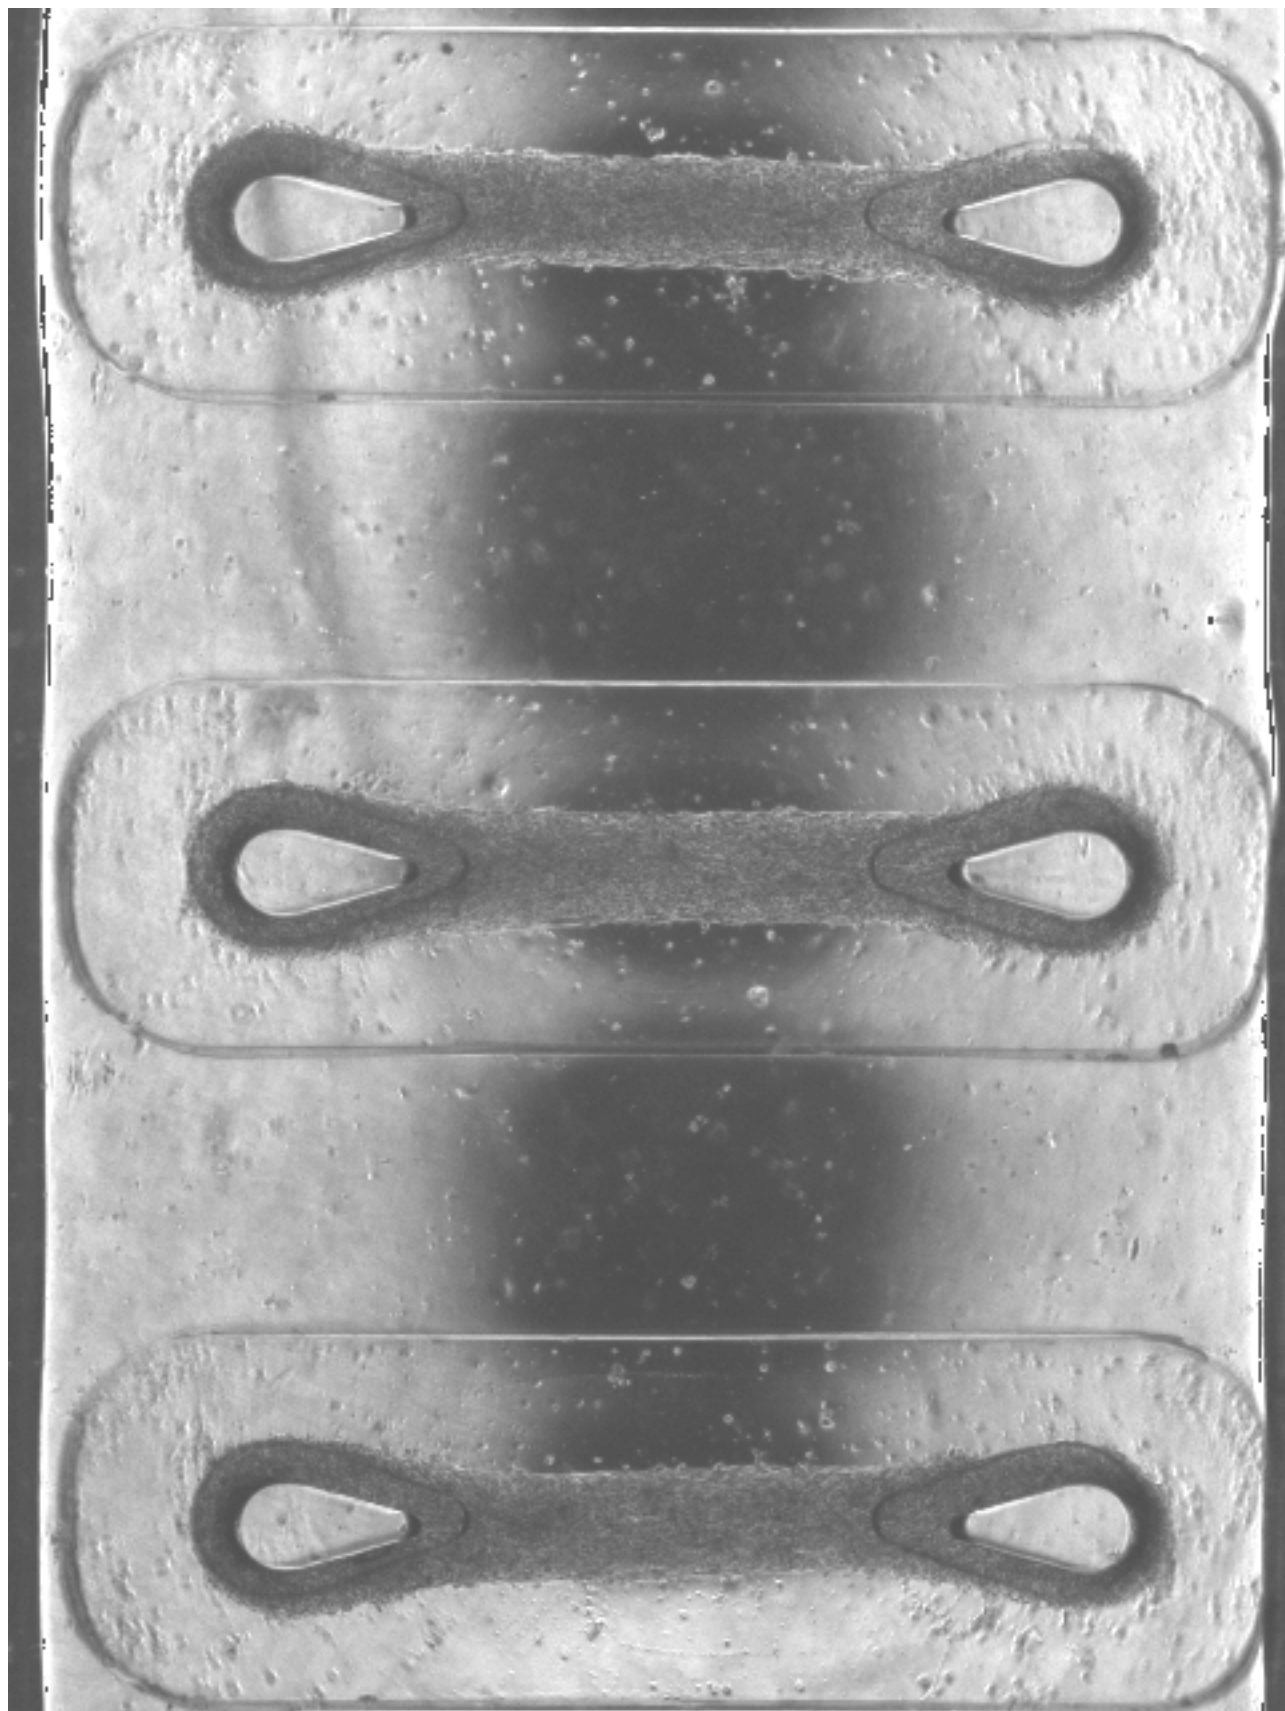

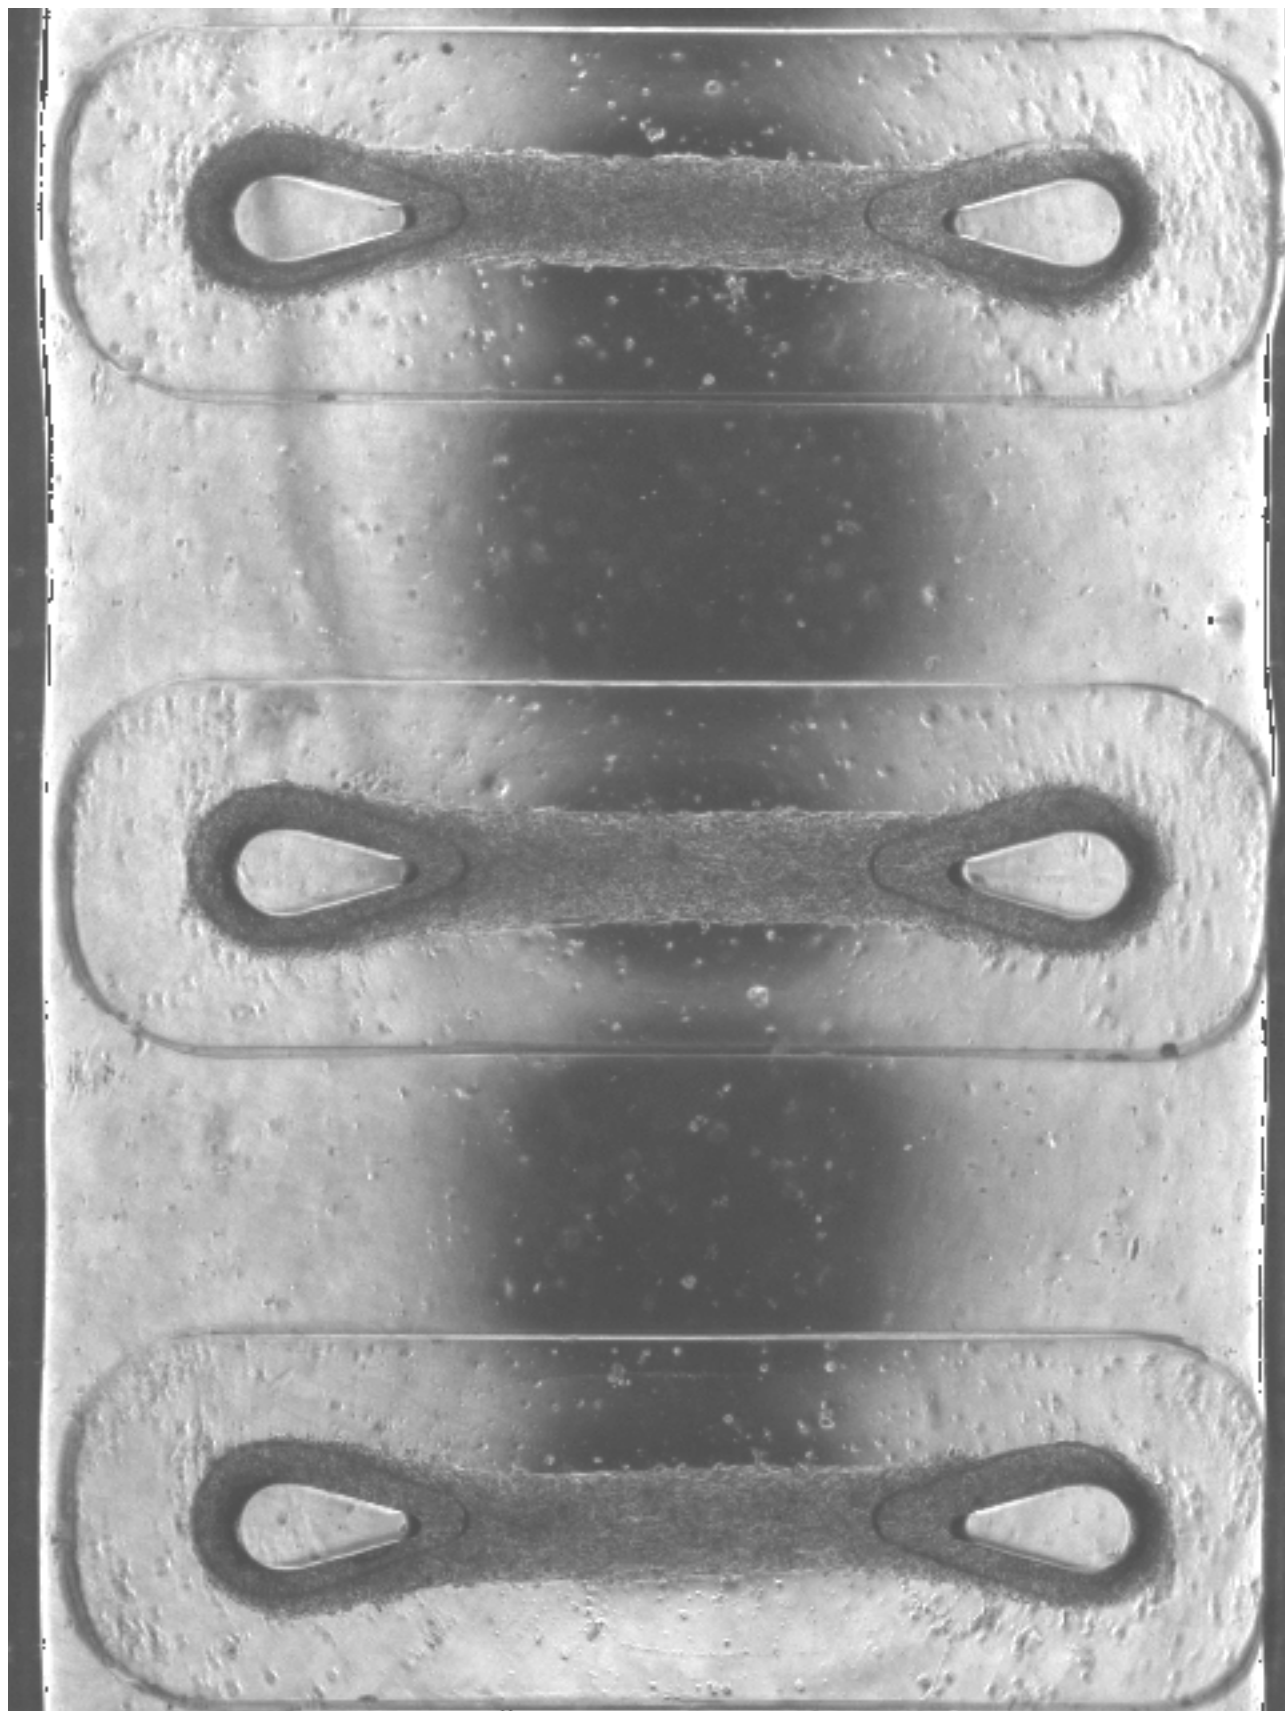

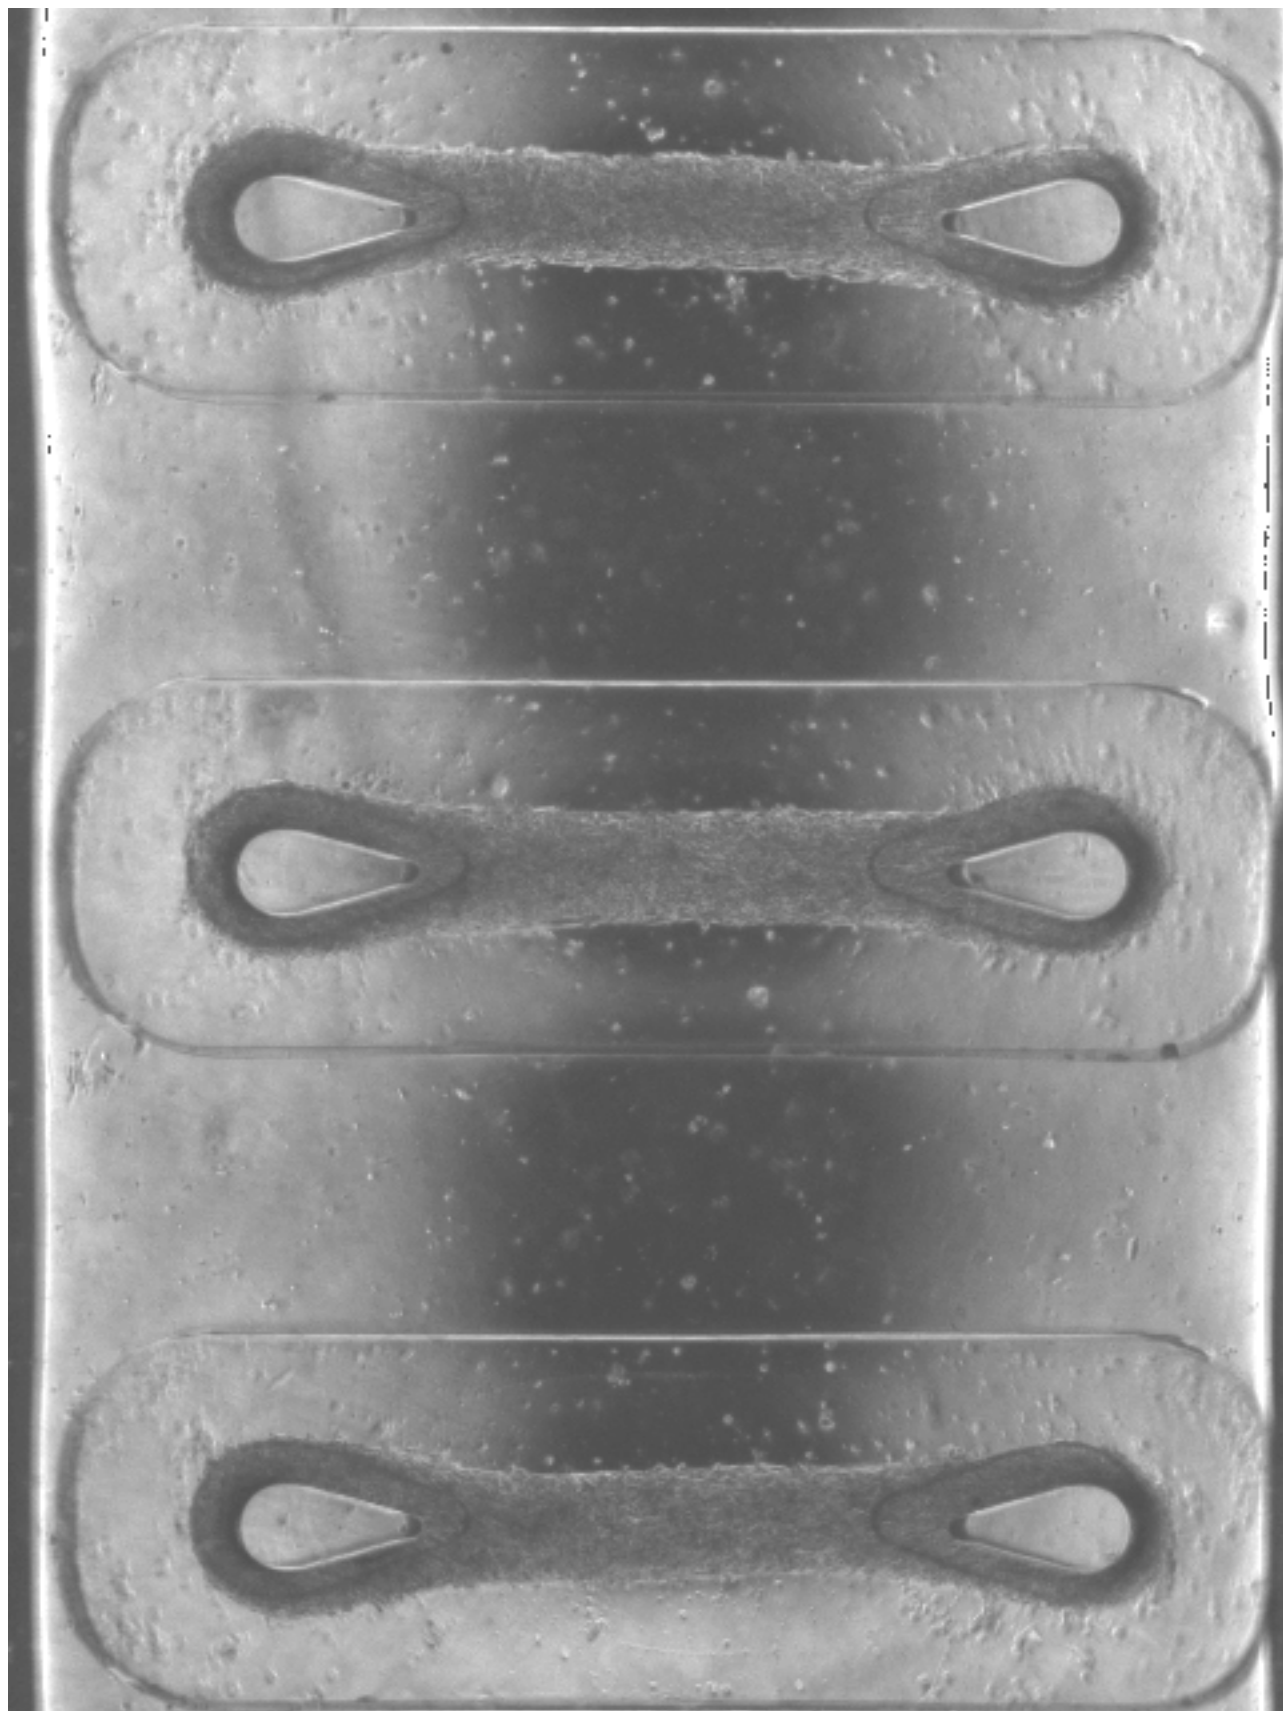

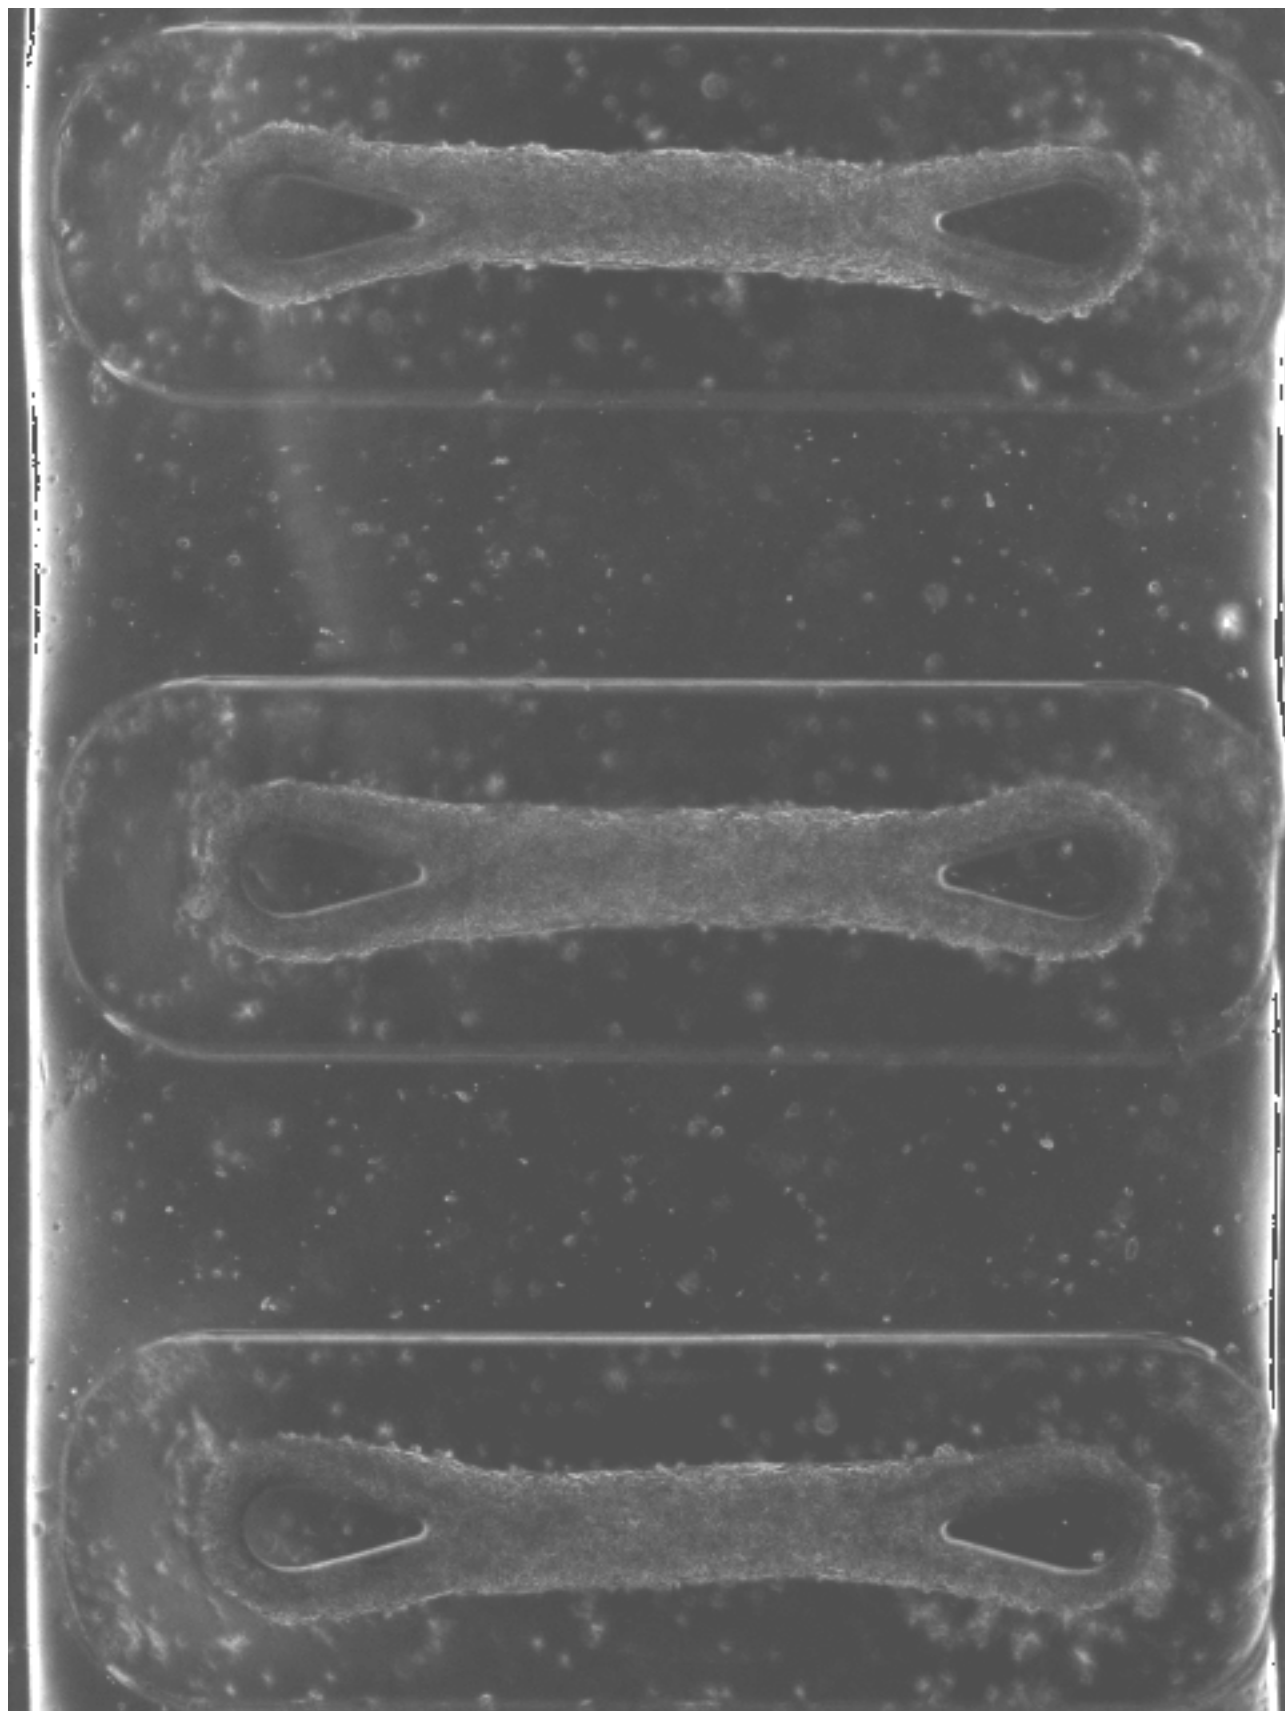

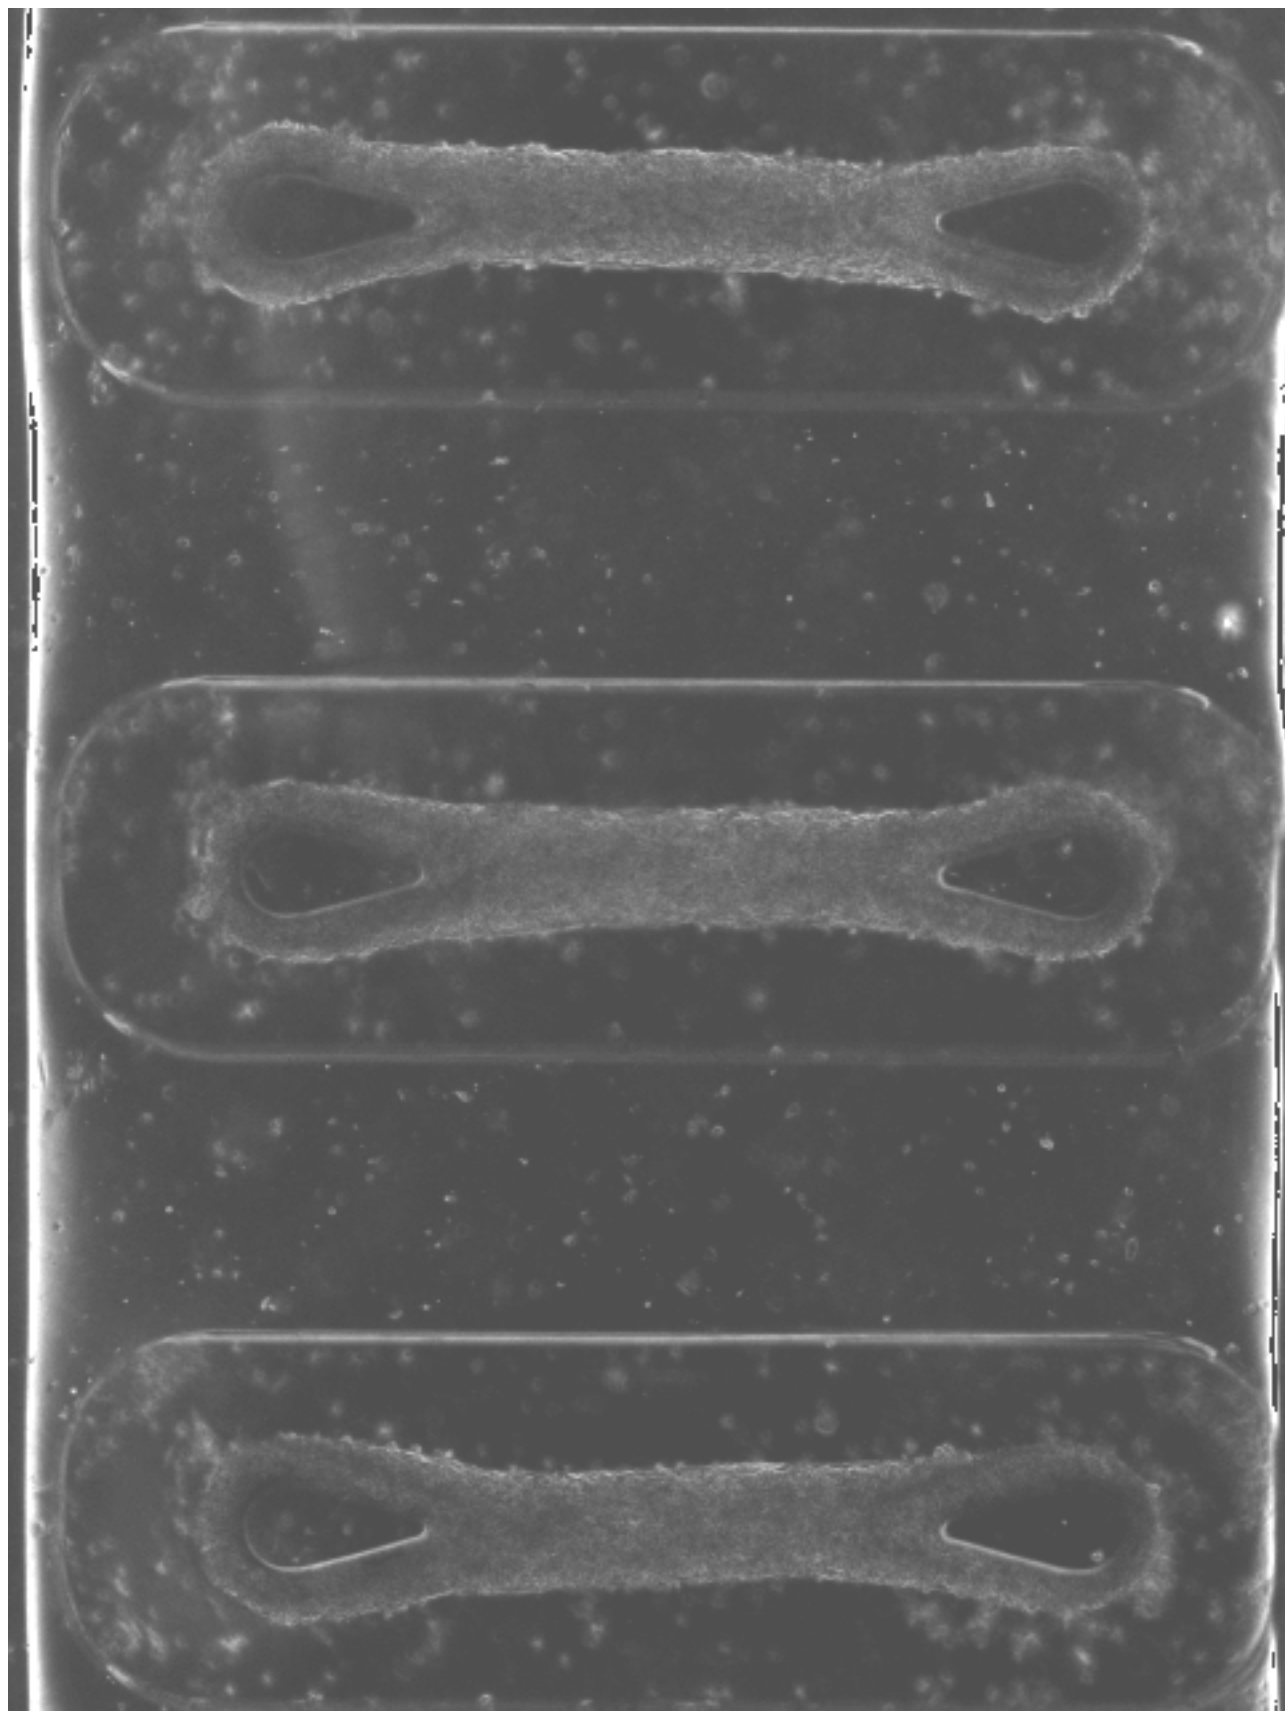

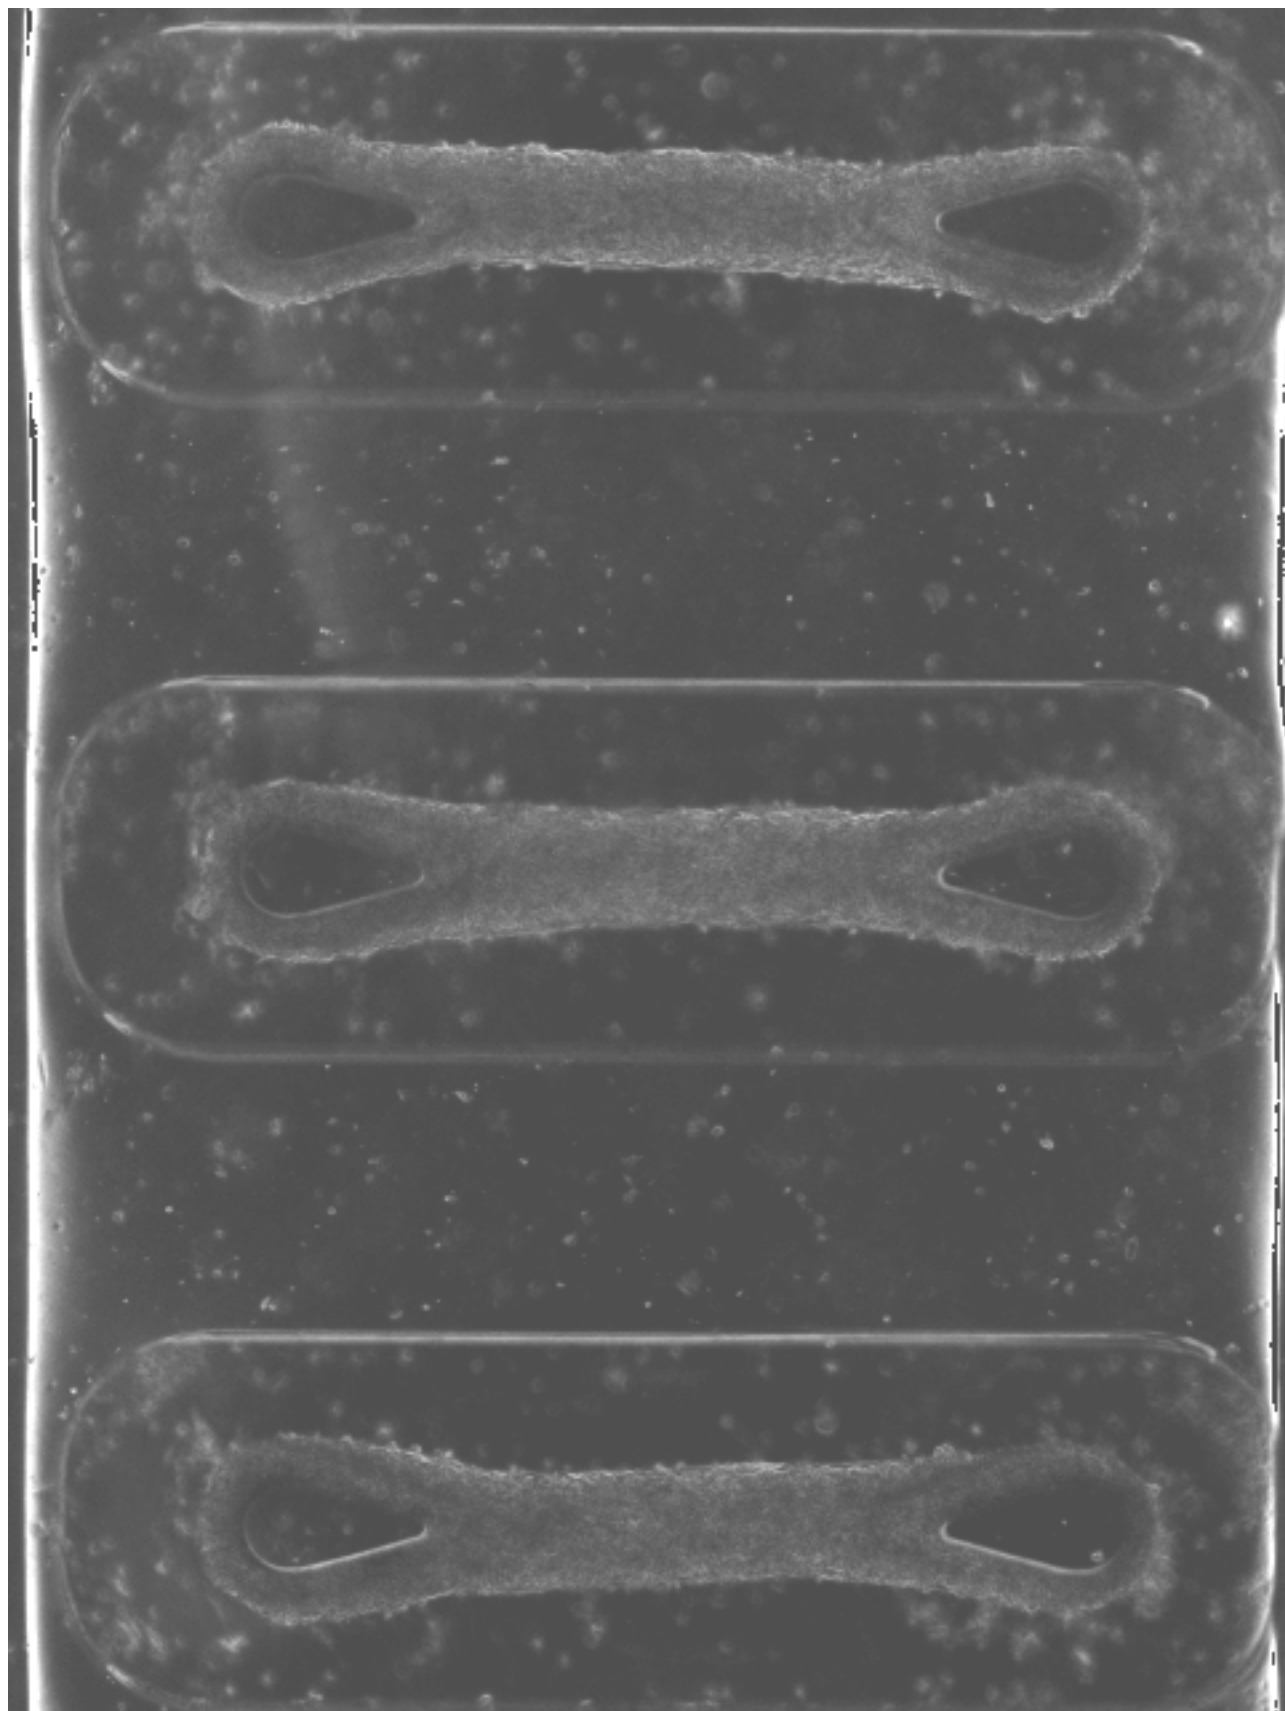

Supplement: c7lc00415j1.pdf [file c7lc00415j1.pdf]
